# Supplementary material for: Digging deeper into the immunopeptidome: characterization of post-translationally modified peptides presented by MHC I
Source: PubMed Central journal article supplement (PMC9807509; doi:10.1007/s42485-021-00066-x), 2021-06-04

# ILNGSDIRSLY – Deamidated

Synthetic

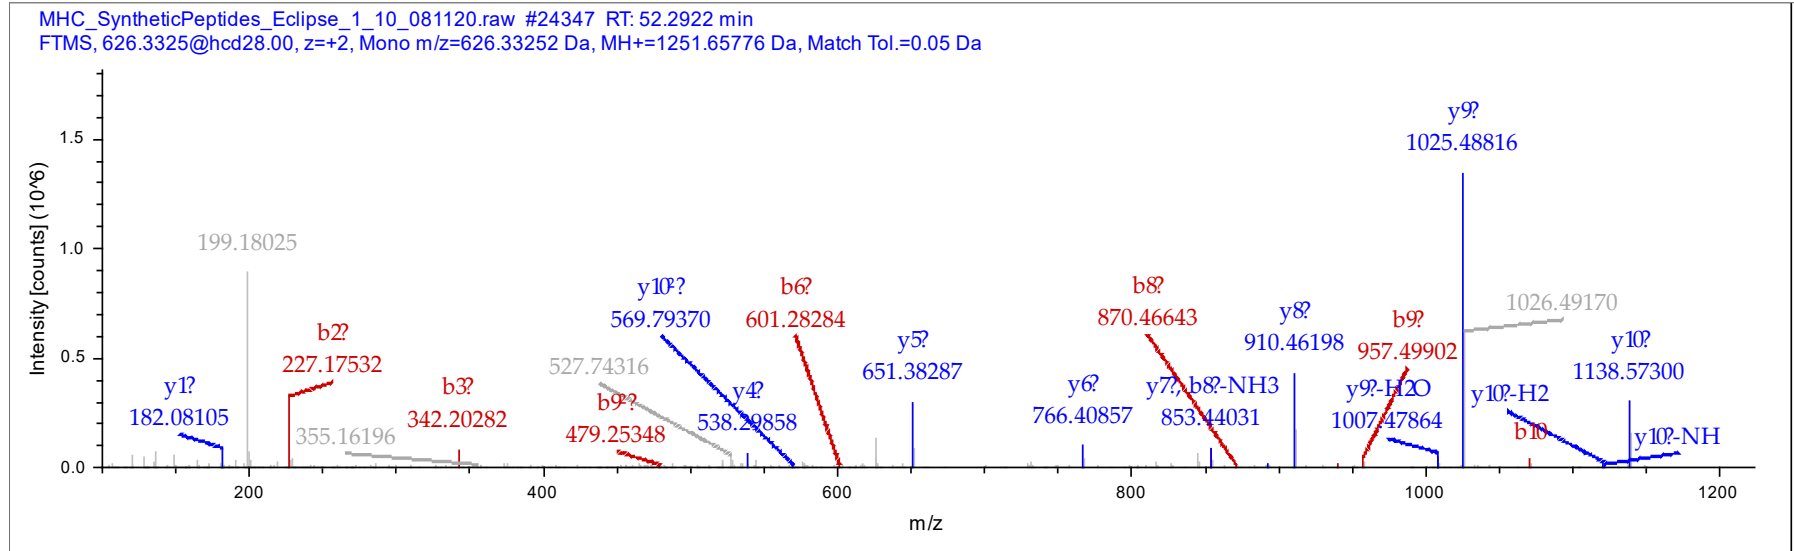

Experimental

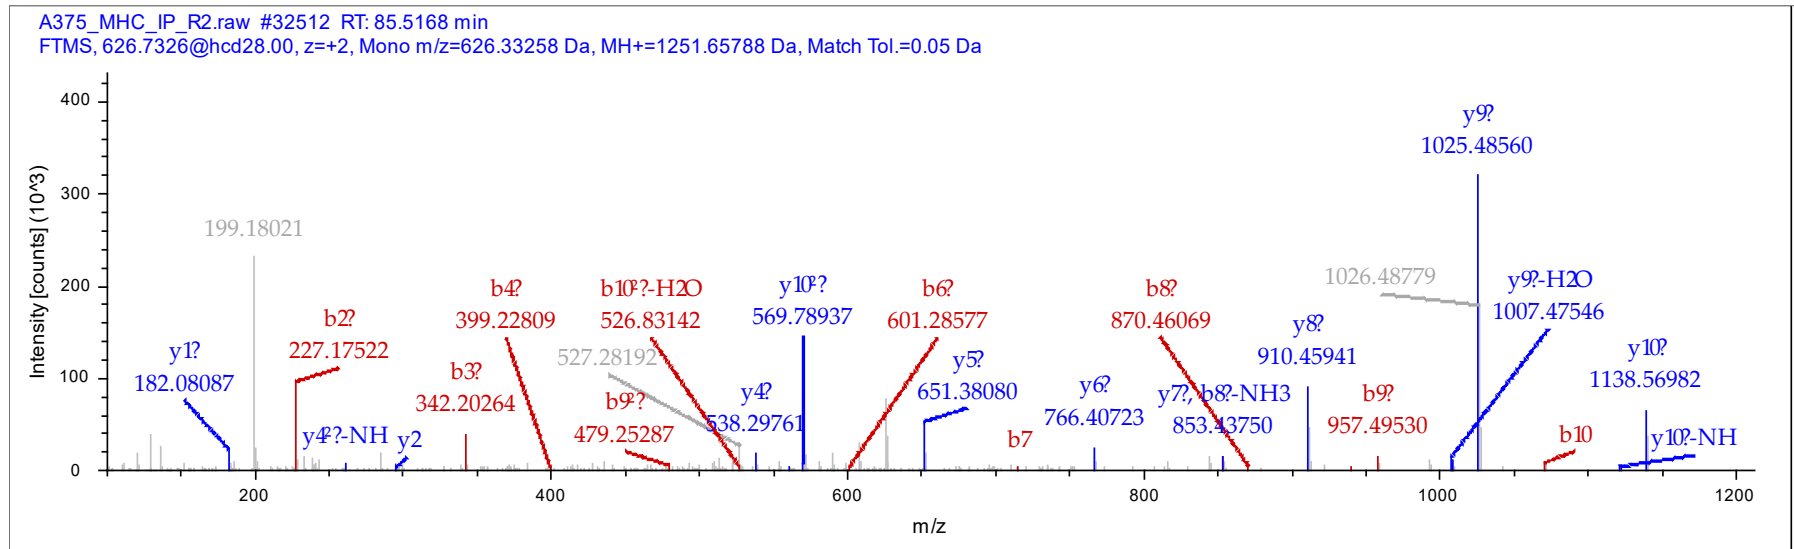

# KLNDTYVNV – Deamidated

Synthetic

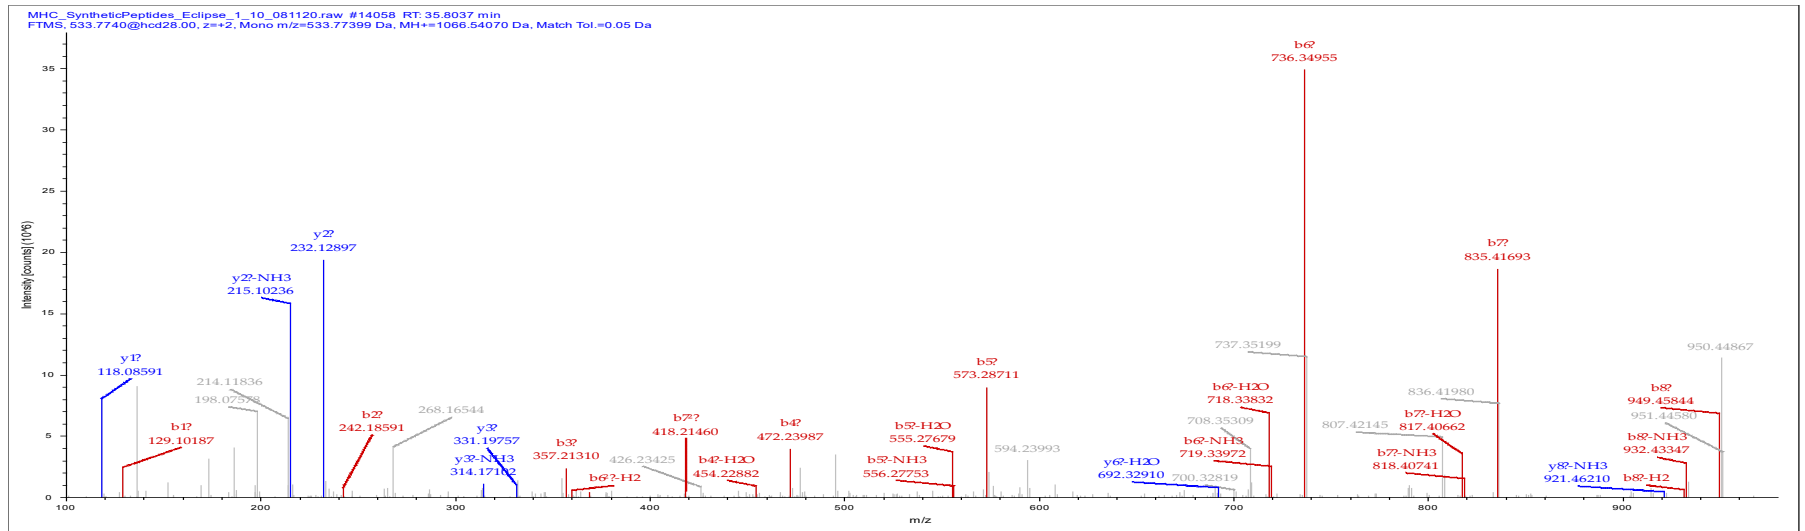

Experimental

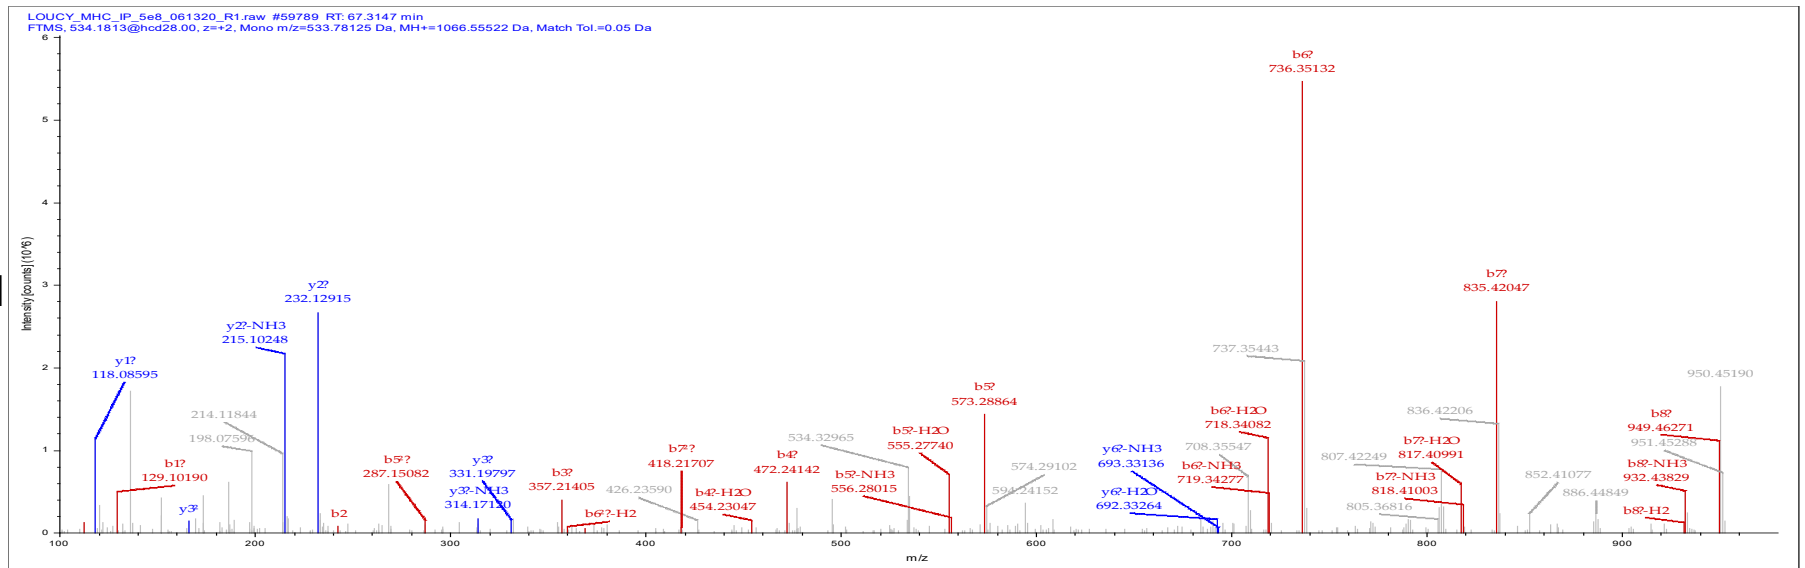

# NLAENISRV – Deamidated

Synthetic

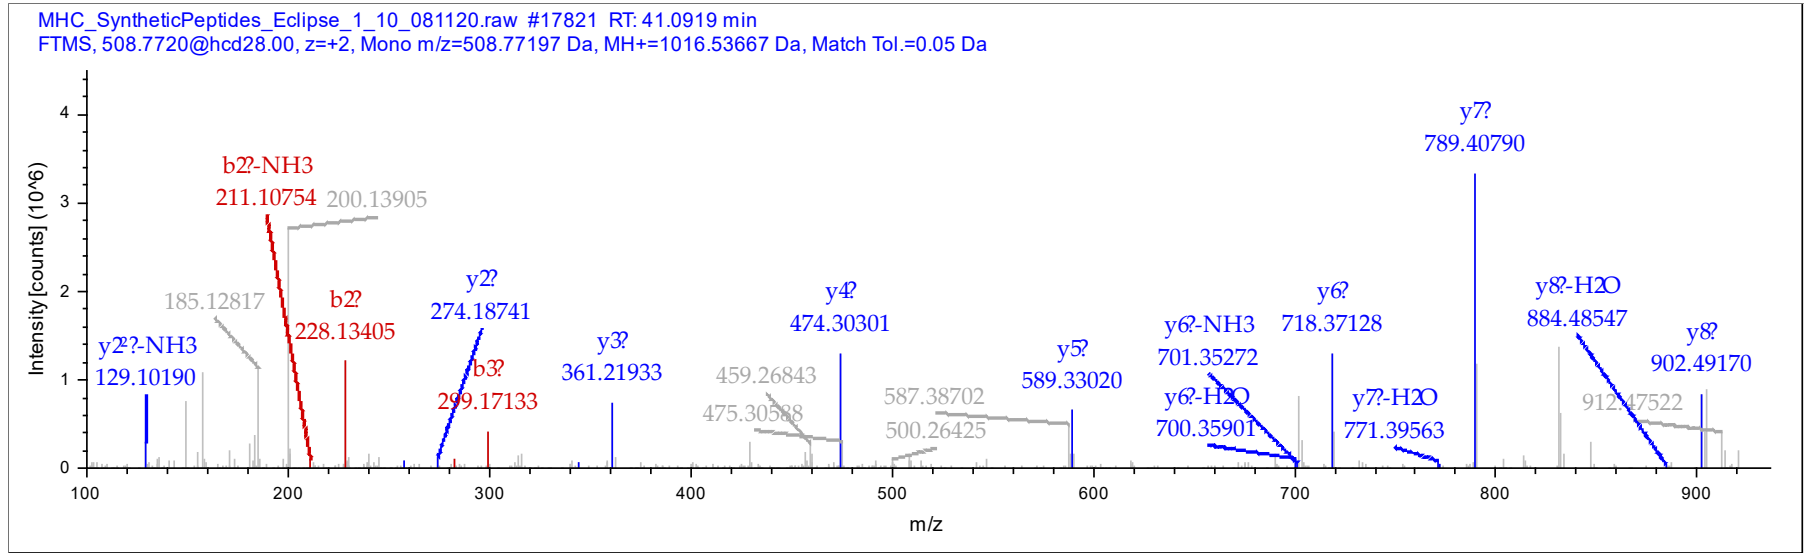

Experimental

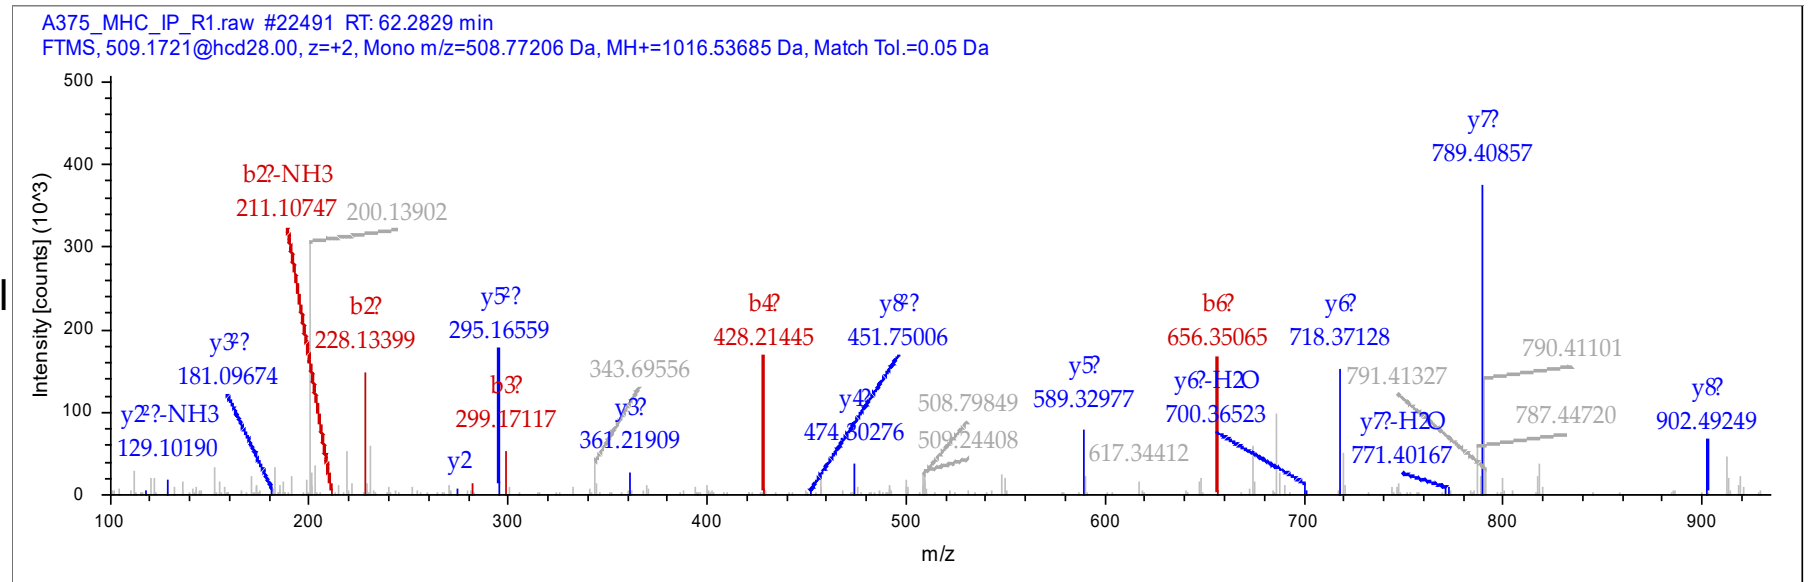

# TSFK**N**STKSW – Deamidated

Synthetic

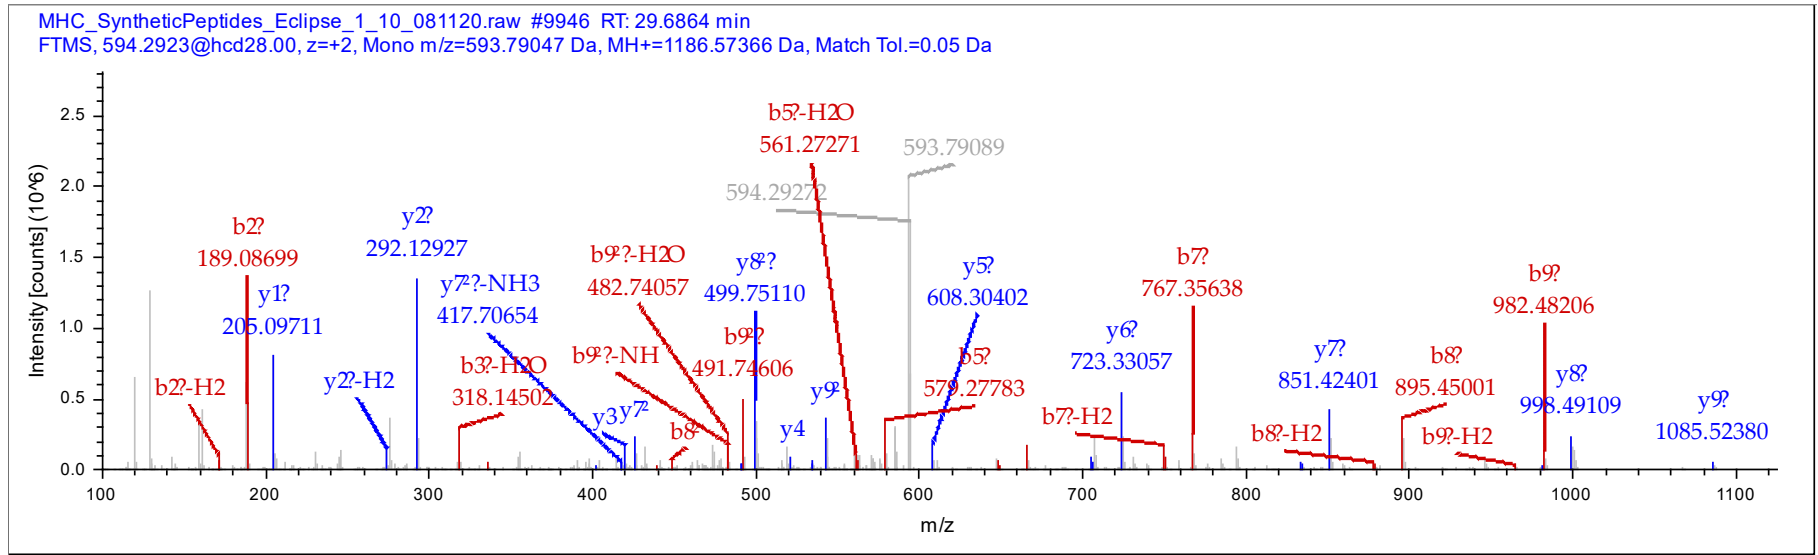

Experimental

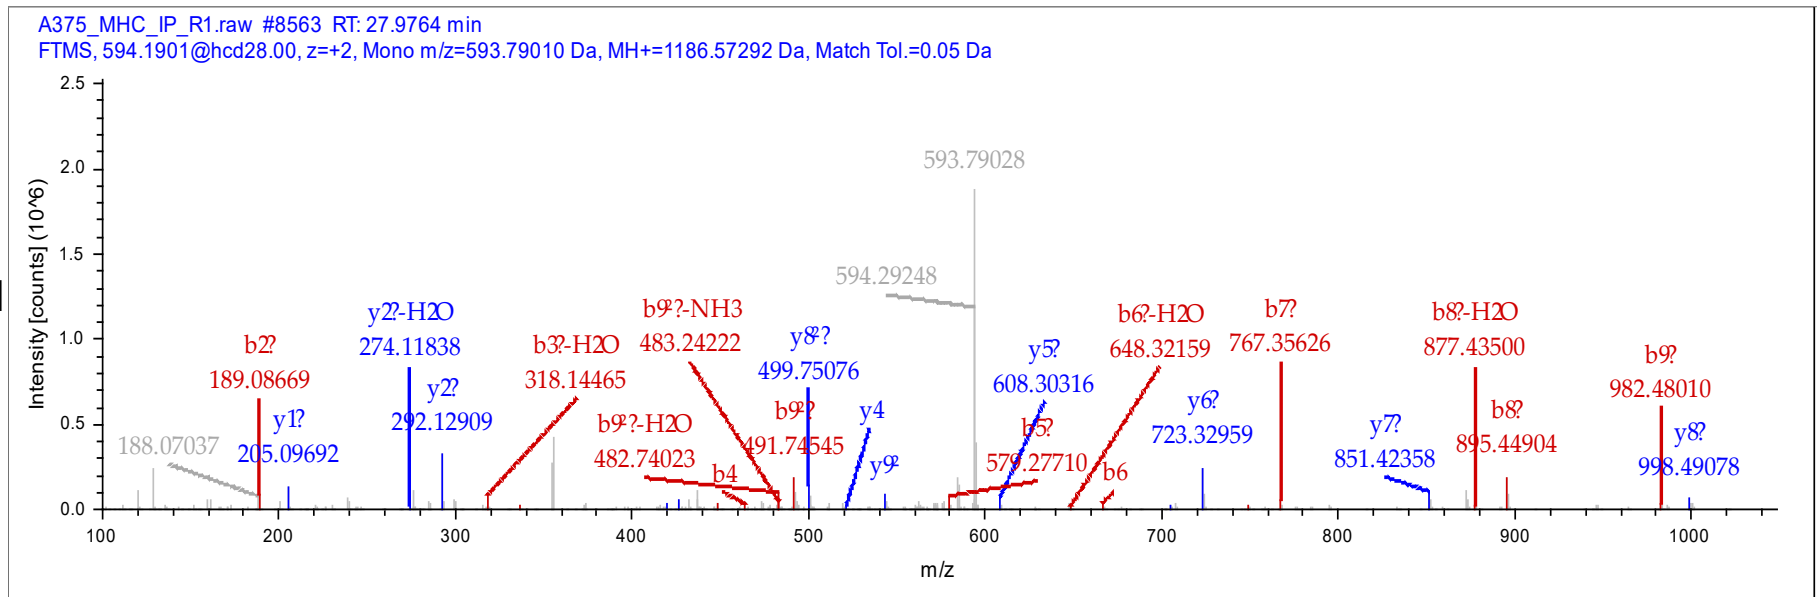

# TTD**T**NITKY – Deamidated

Synthetic

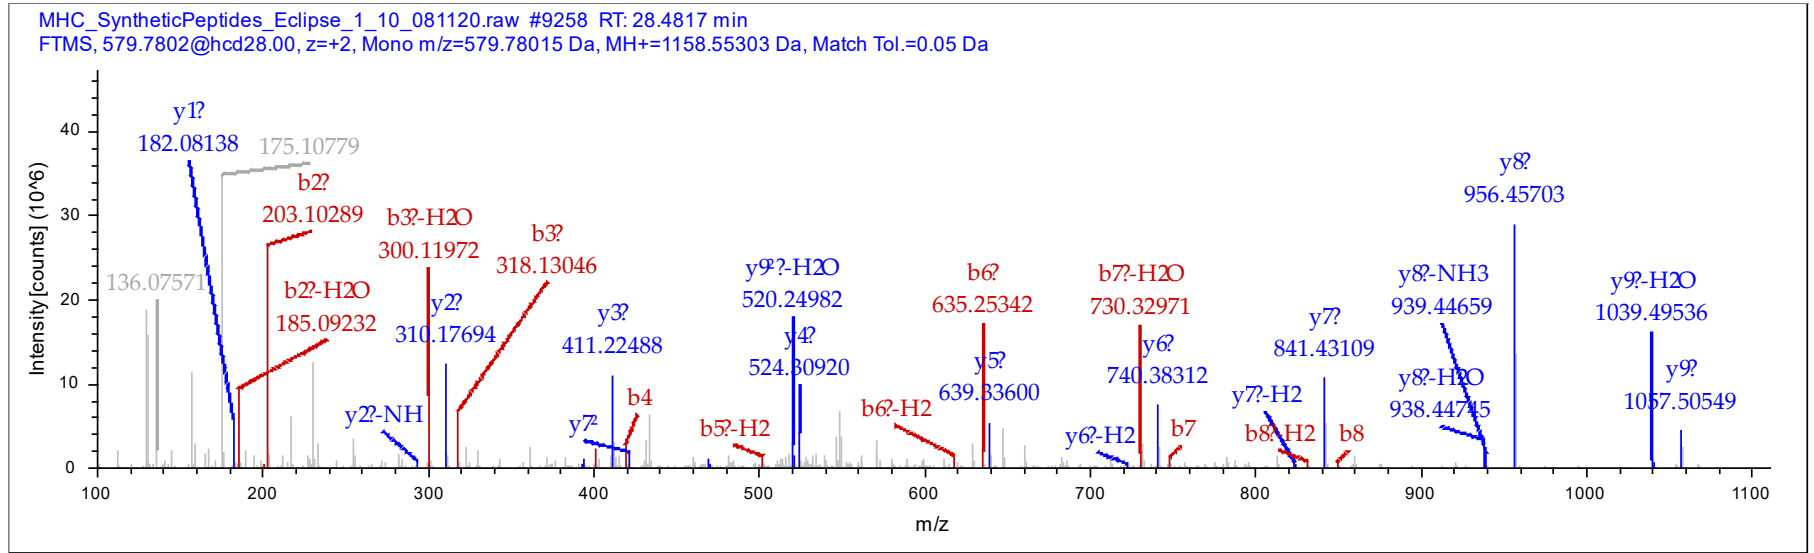

Experimental

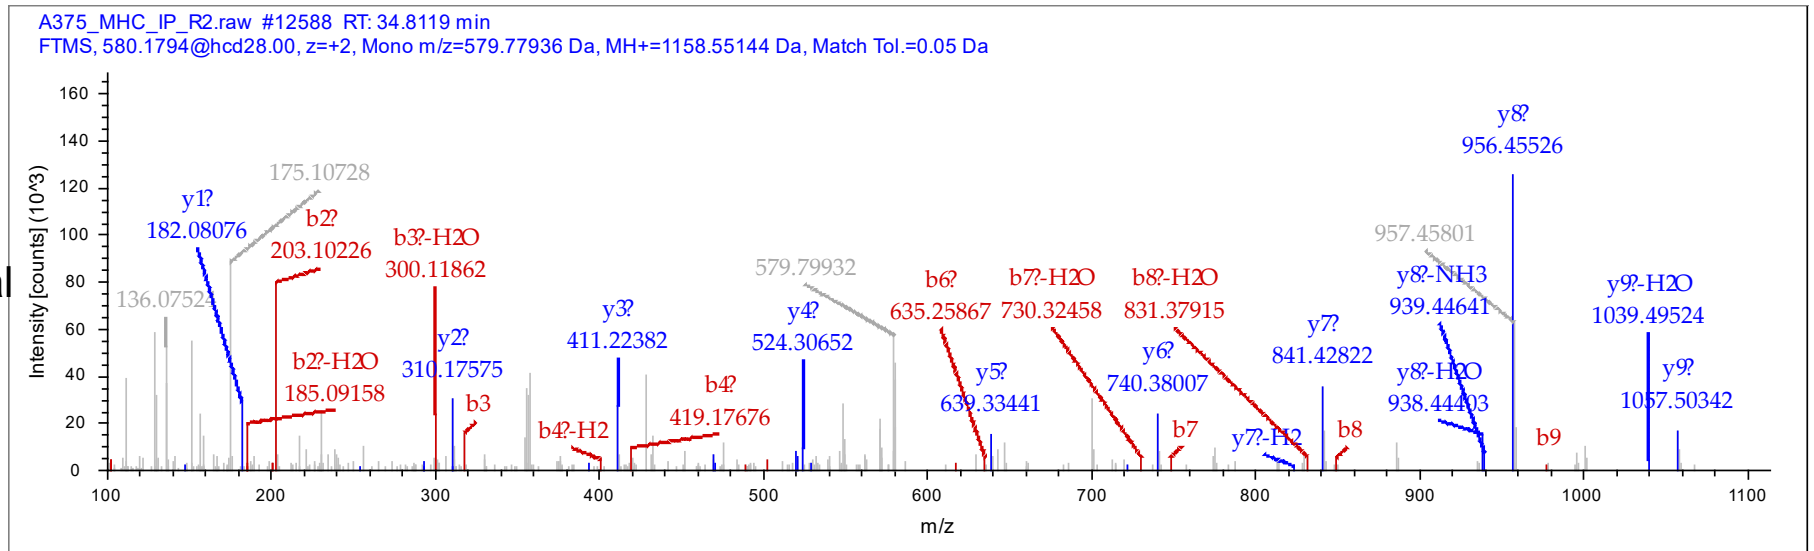

# EELNLSGNKL – Deamidated

Synthetic

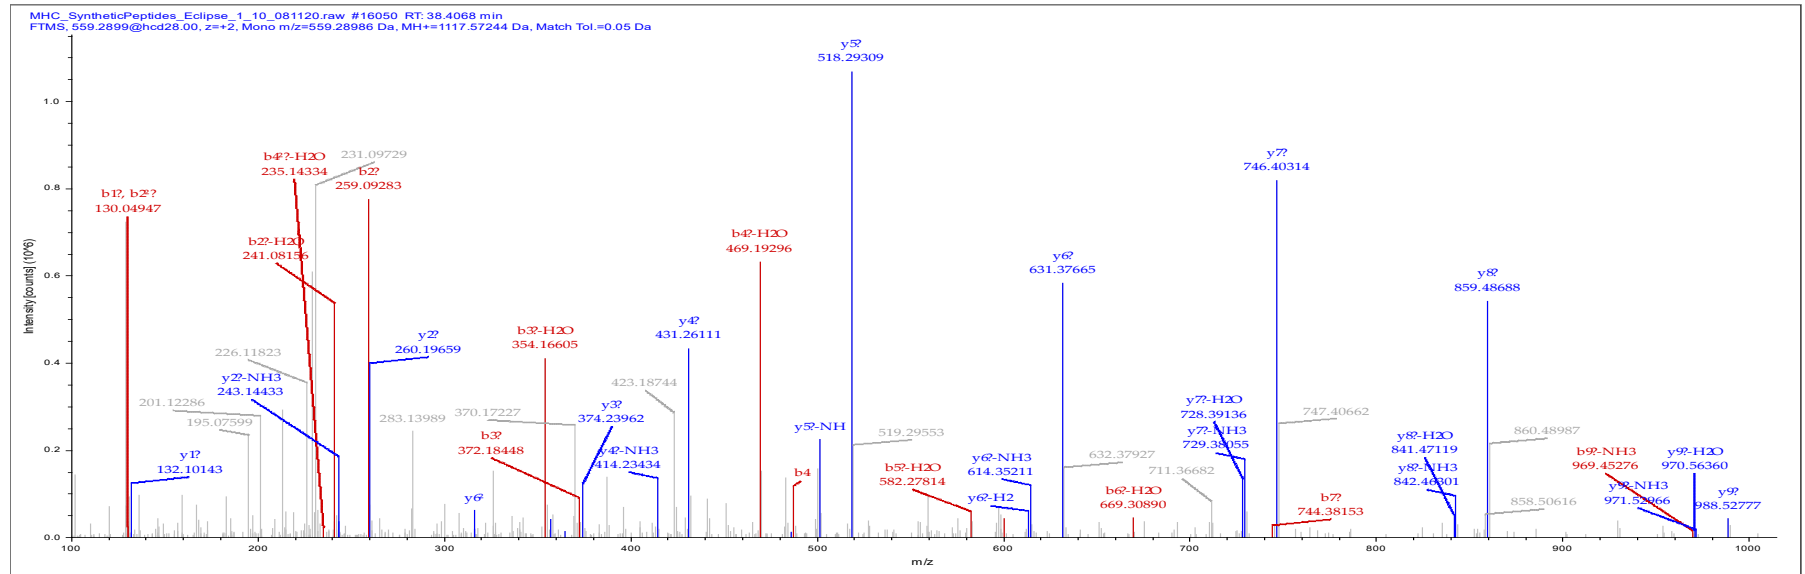

Experimental

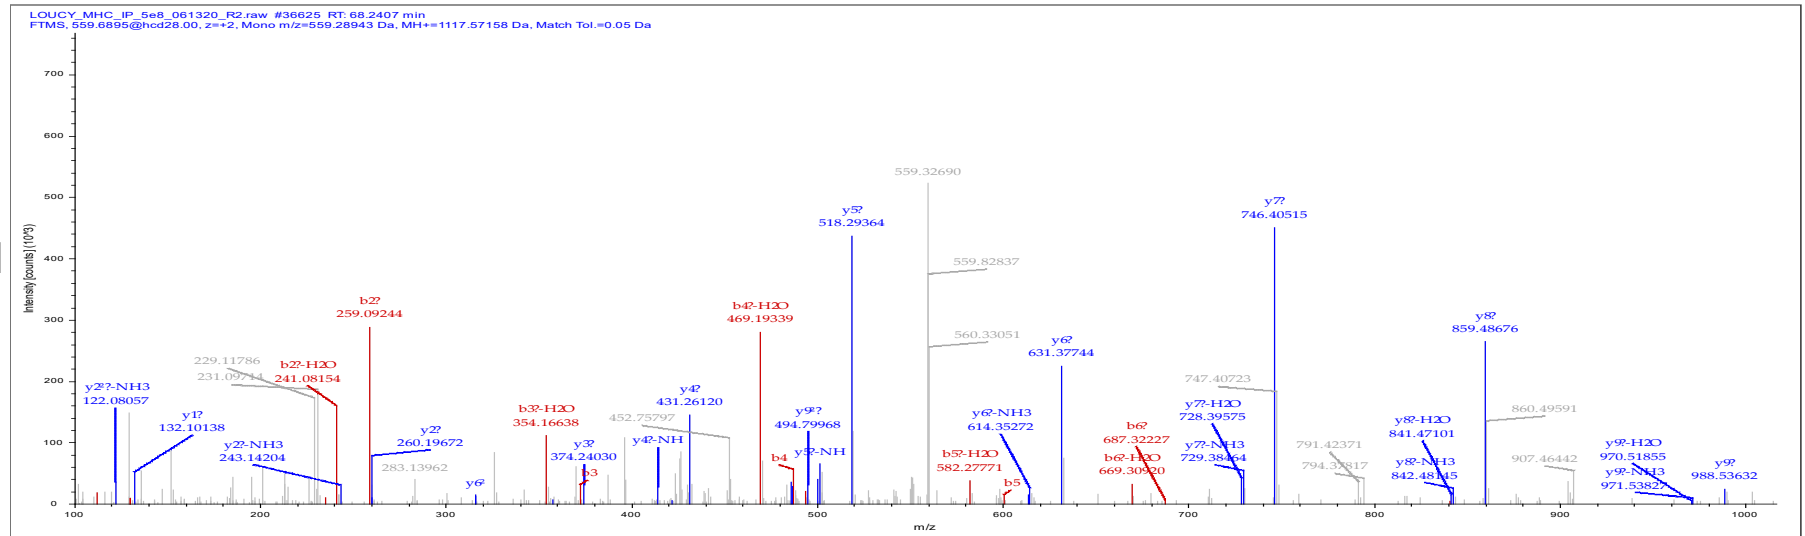

# FVY**N**ITTNK – Deamidated

Synthetic

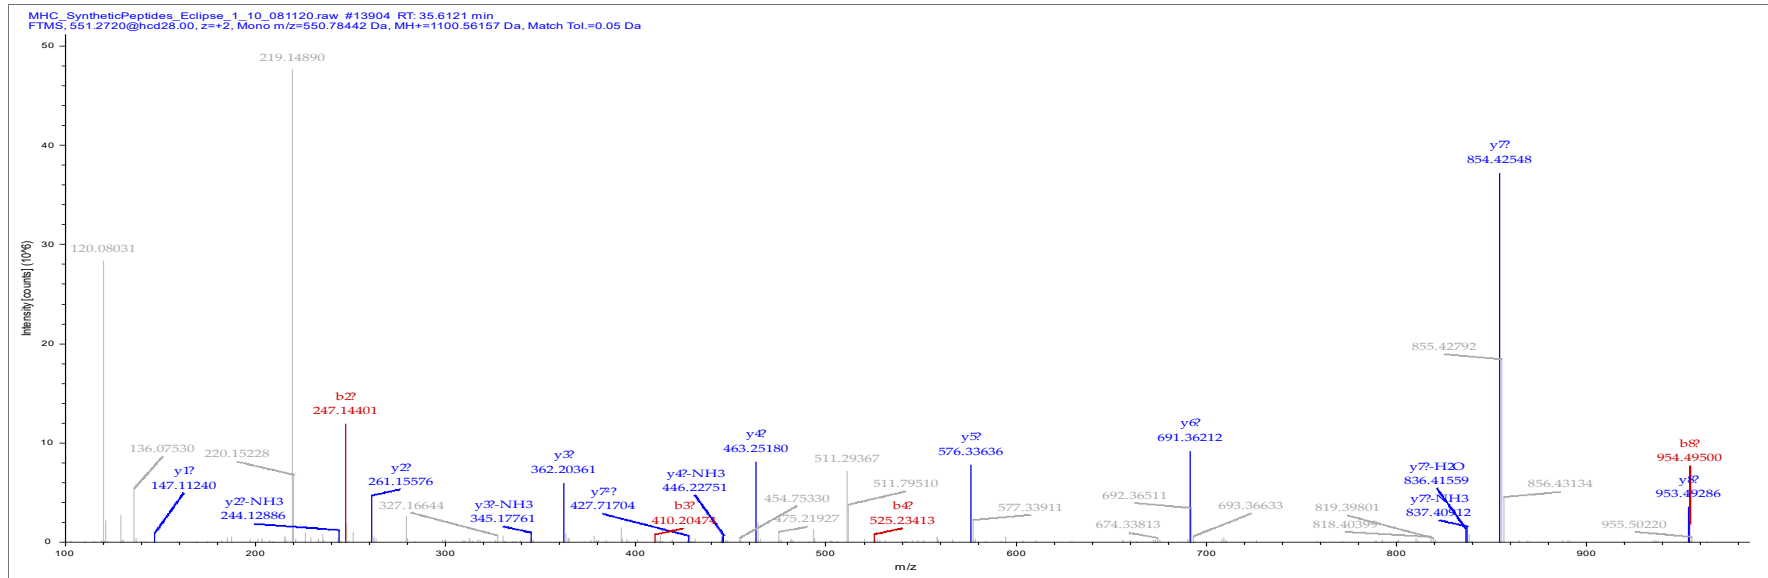

Experimental

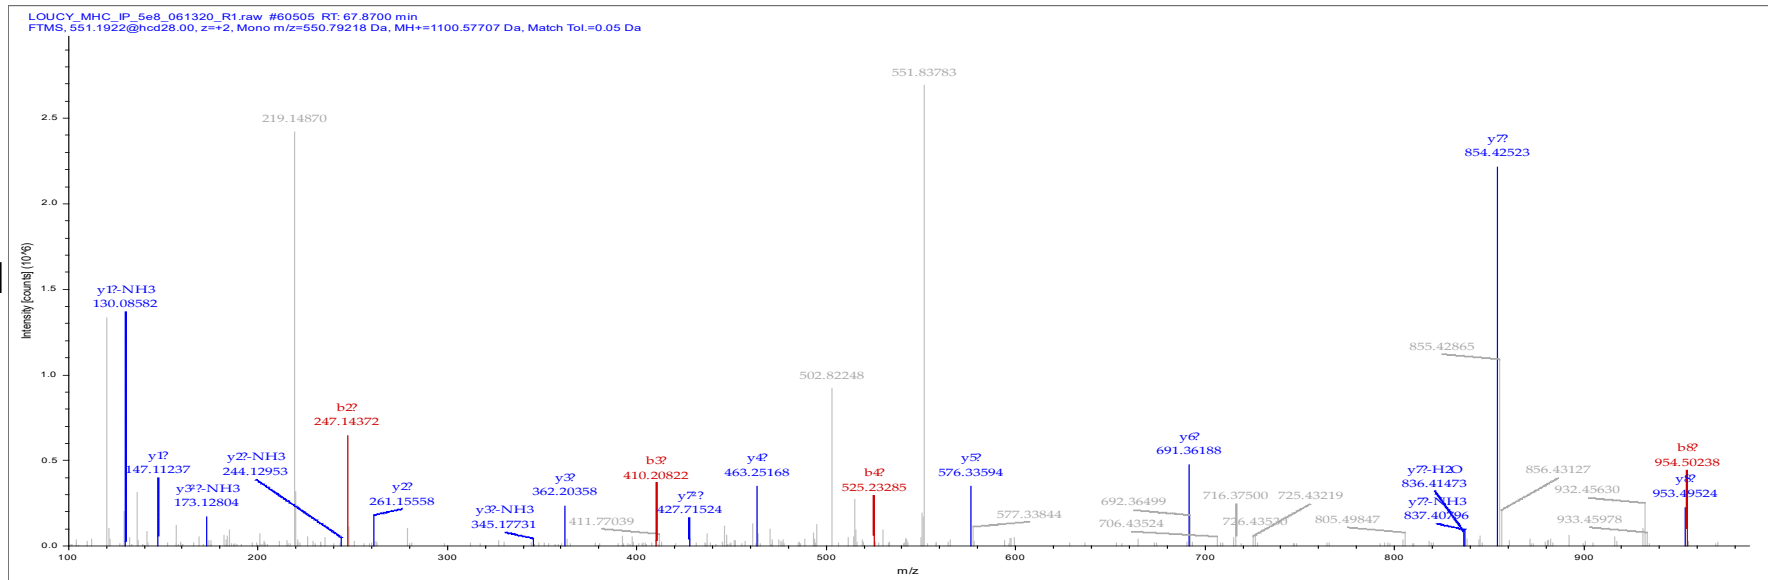

# HTNATVSFL – Deamidated

Synthetic

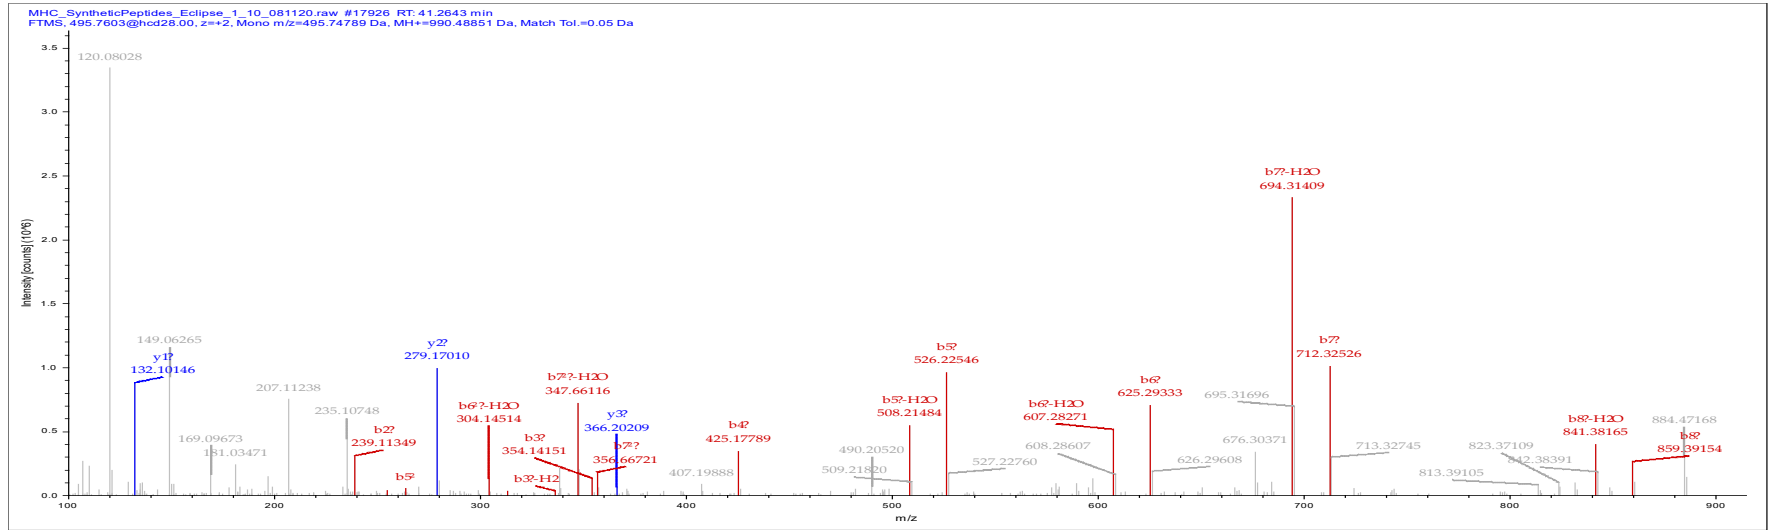

Experimental

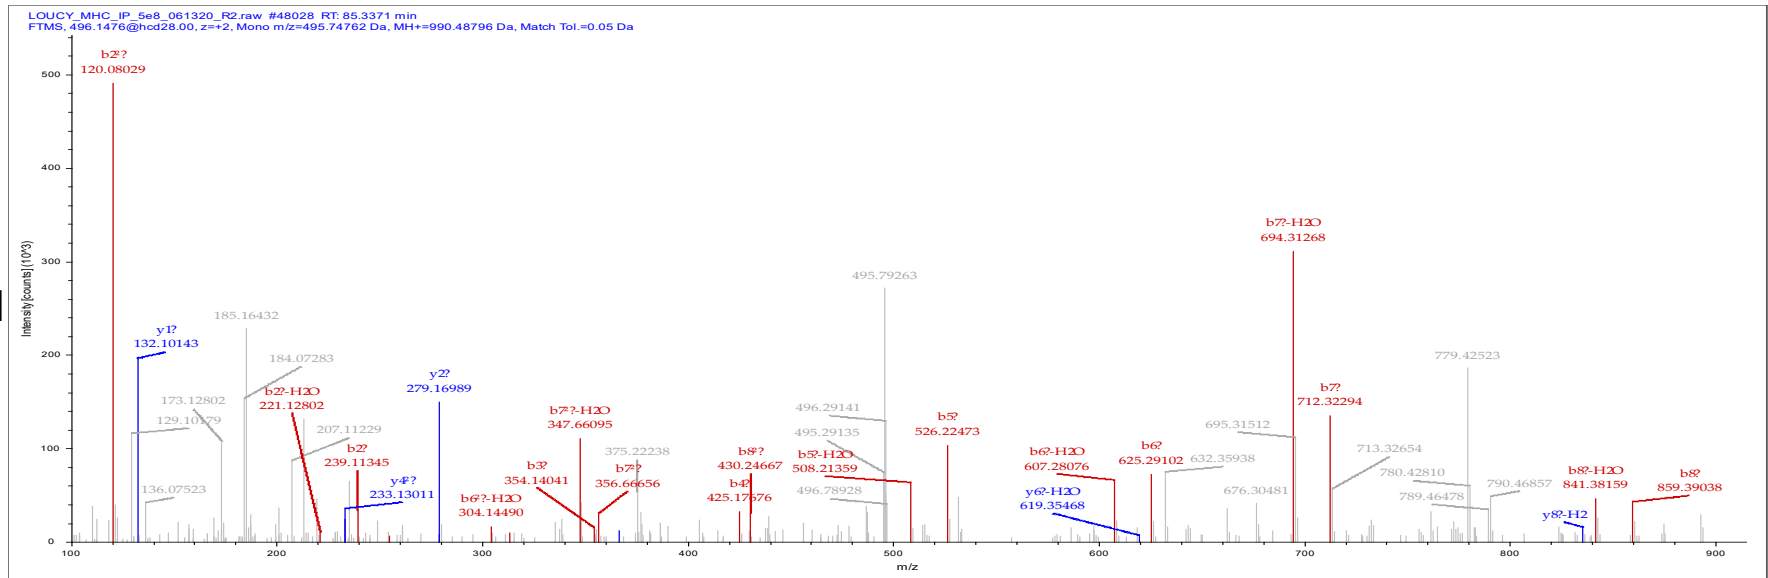



# MPVEK**N**ITL – Deamidated

Synthetic

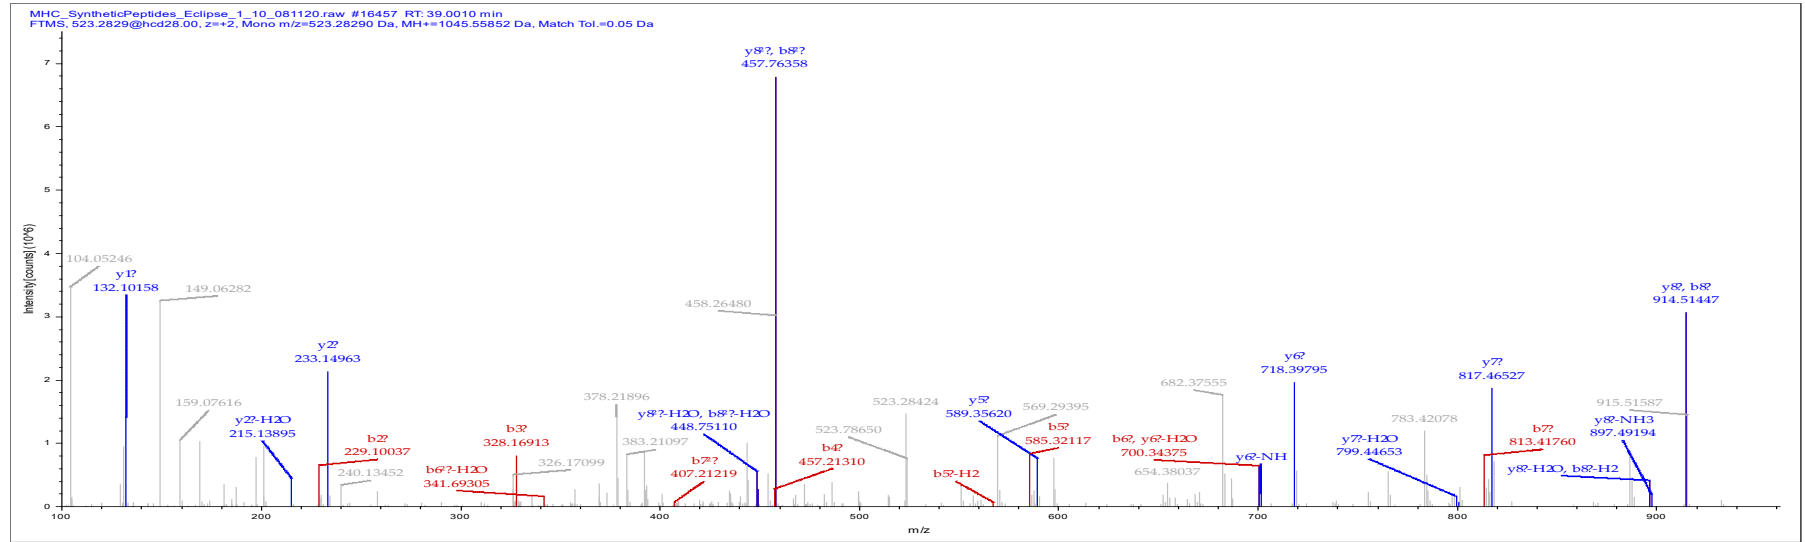

Experimental

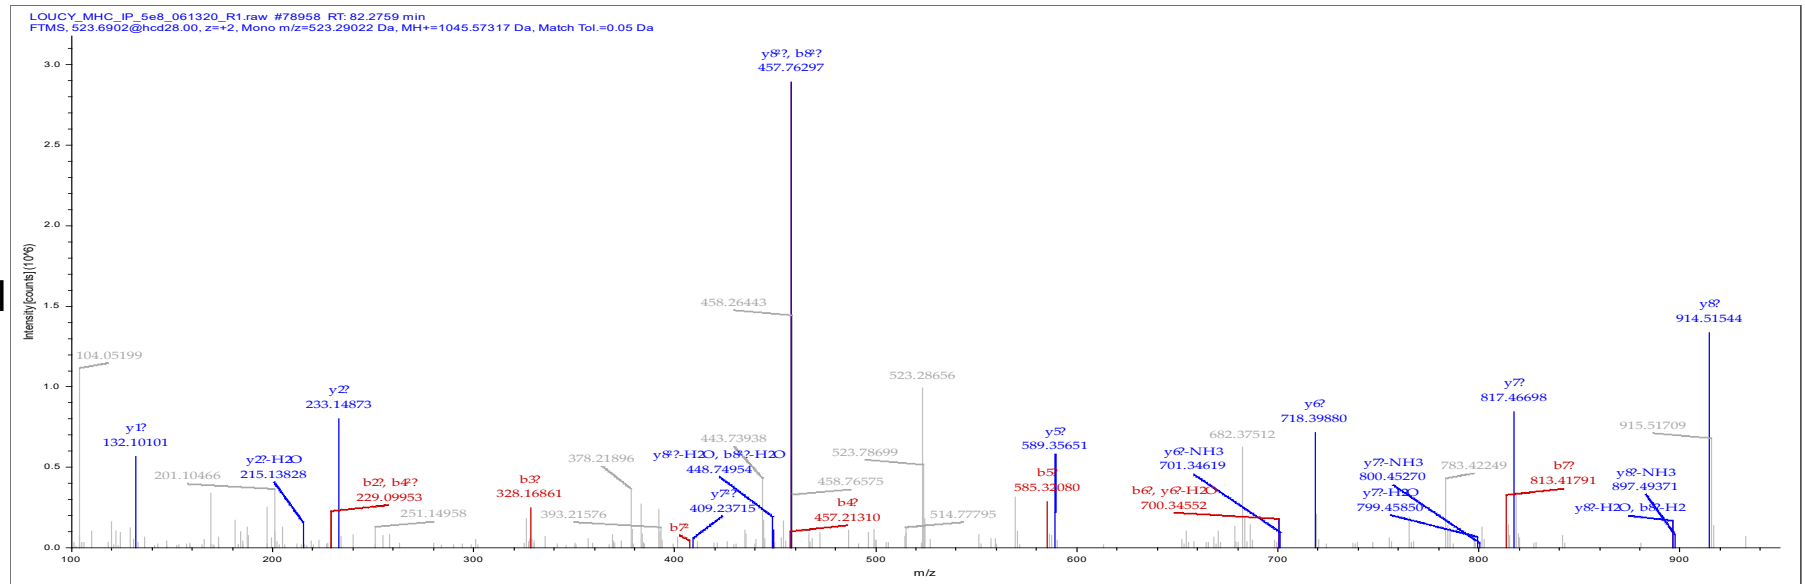

# NESEYTVKW – Deamidated

Synthetic

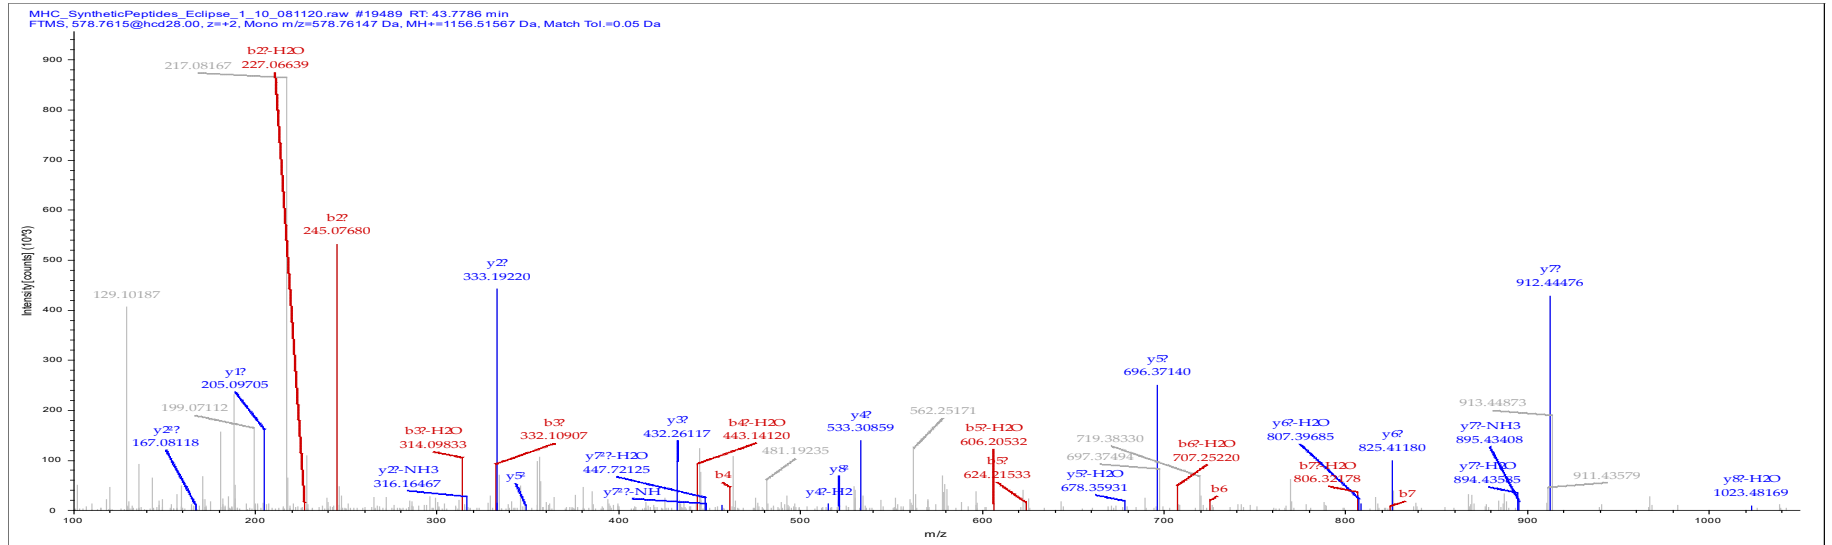

Experimental

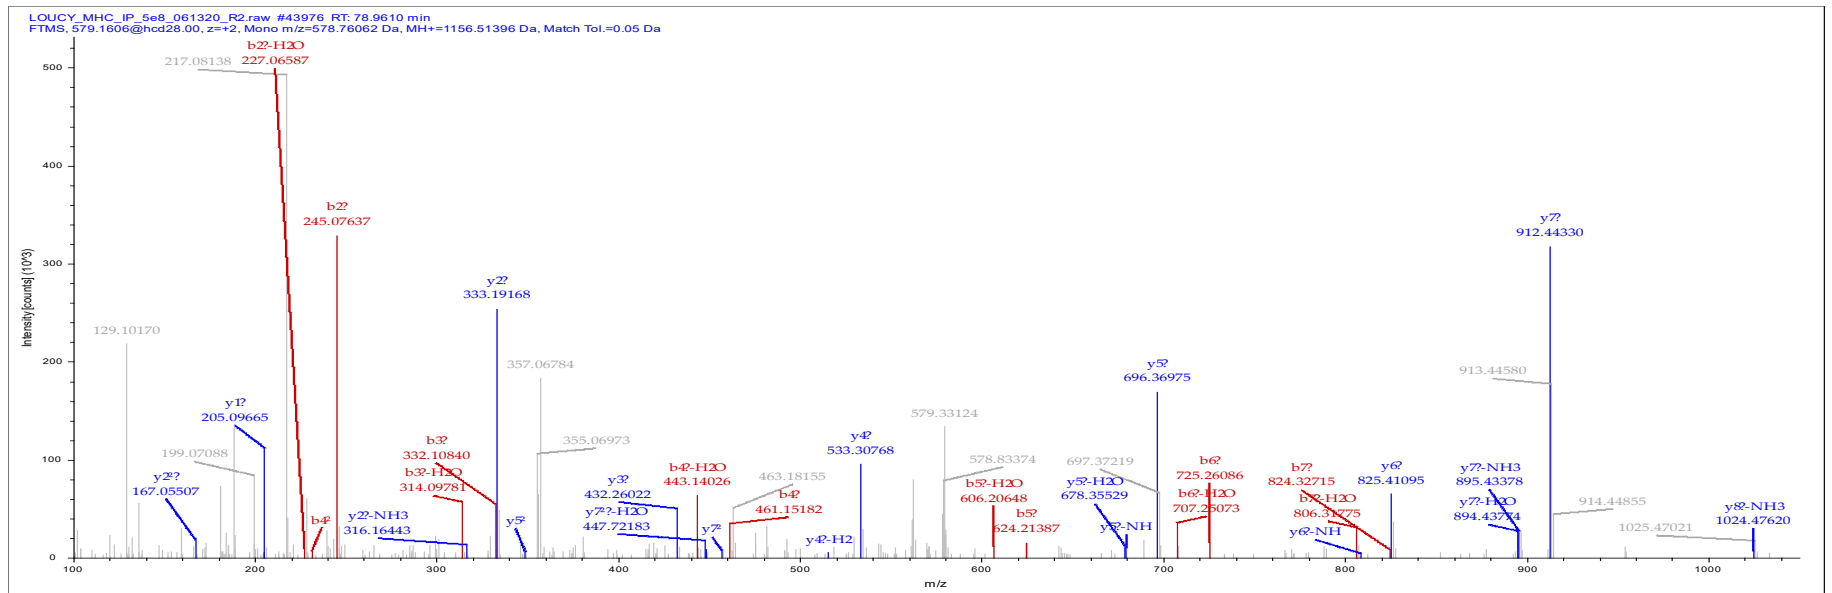

# AENSPTRQQF – Phospho

Synthetic

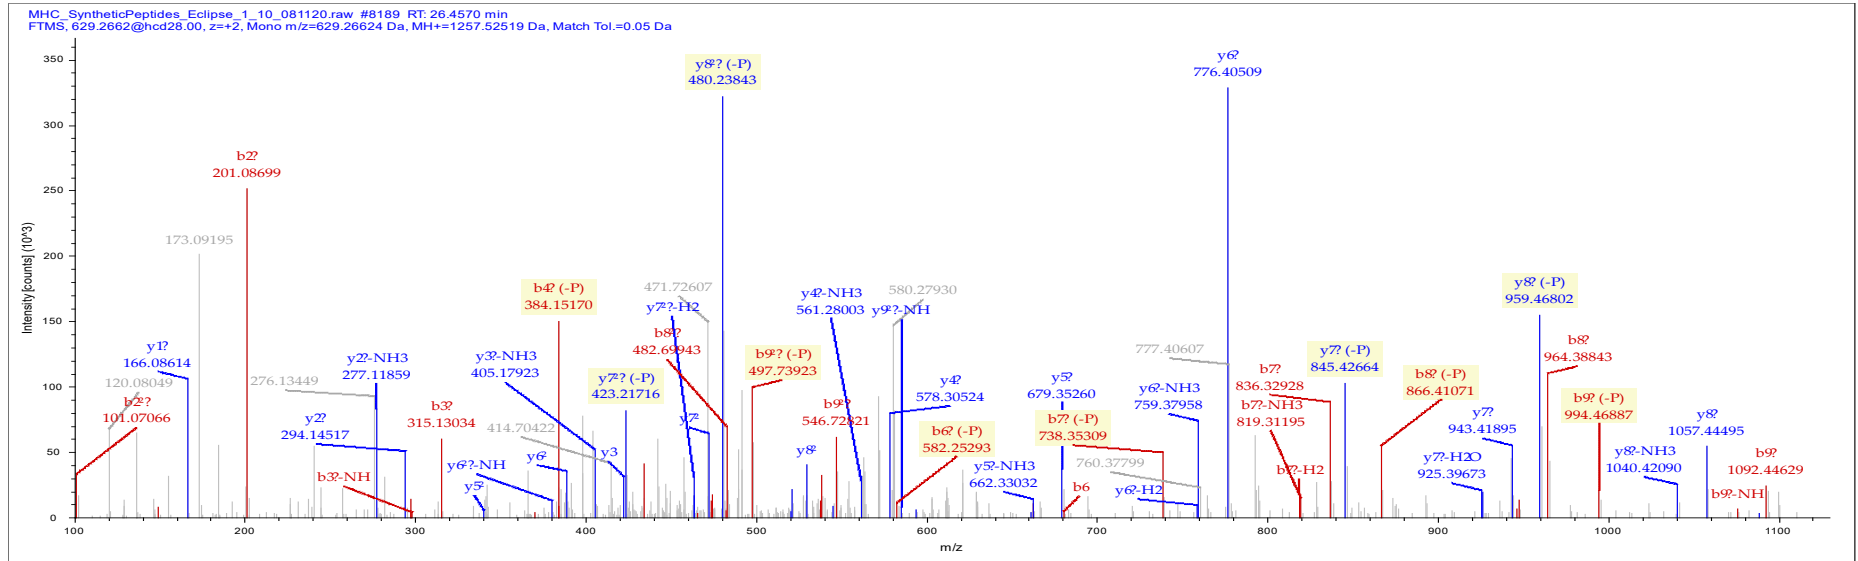

Experimental

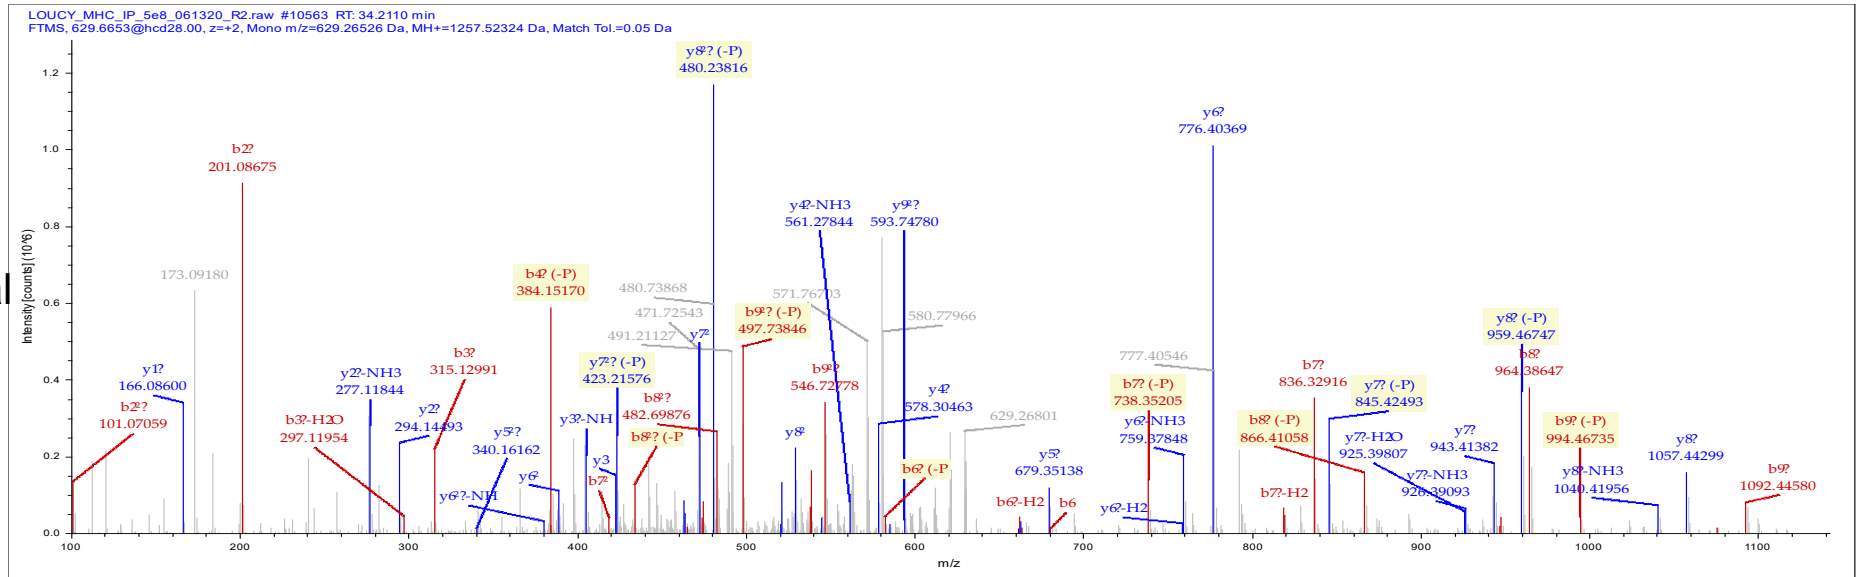

# ATYTPQAPK – Phospho

Synthetic

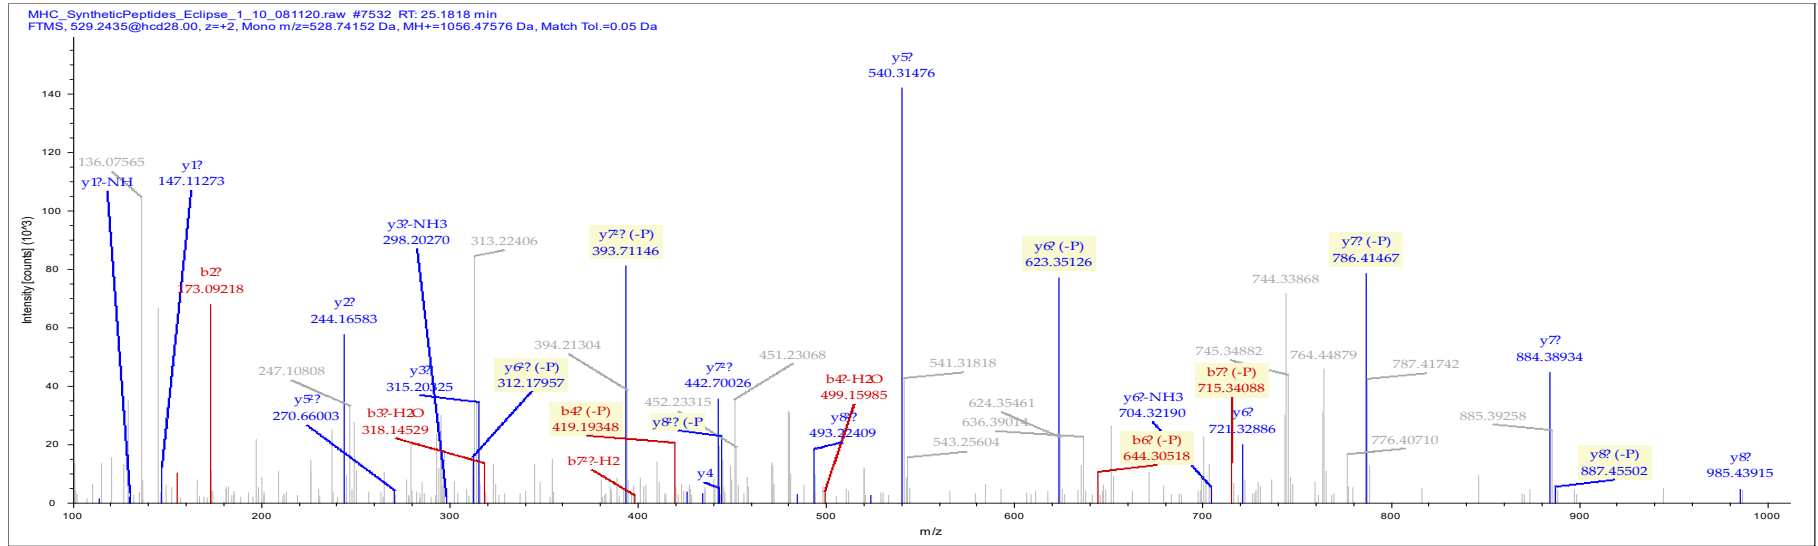

Experimental

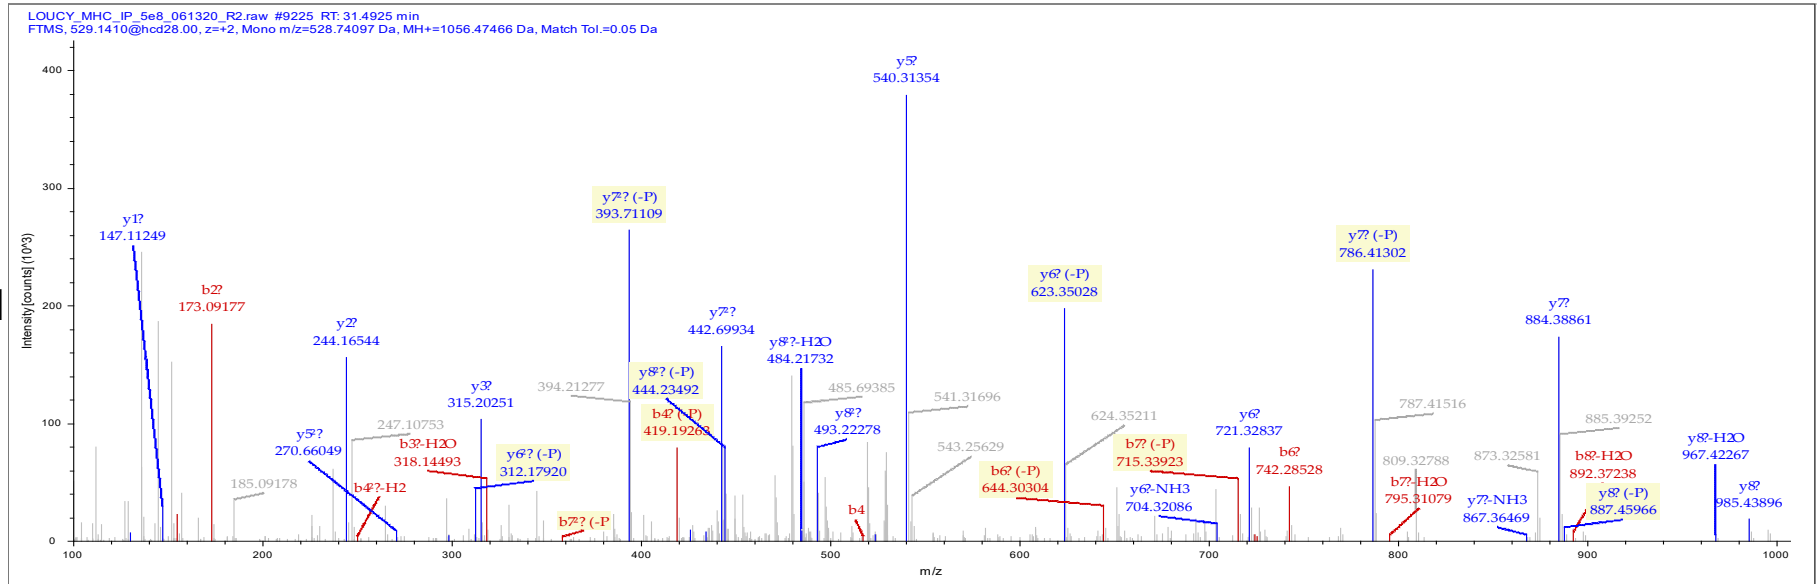

# APVSPSSQKL – Phospho

Synthetic

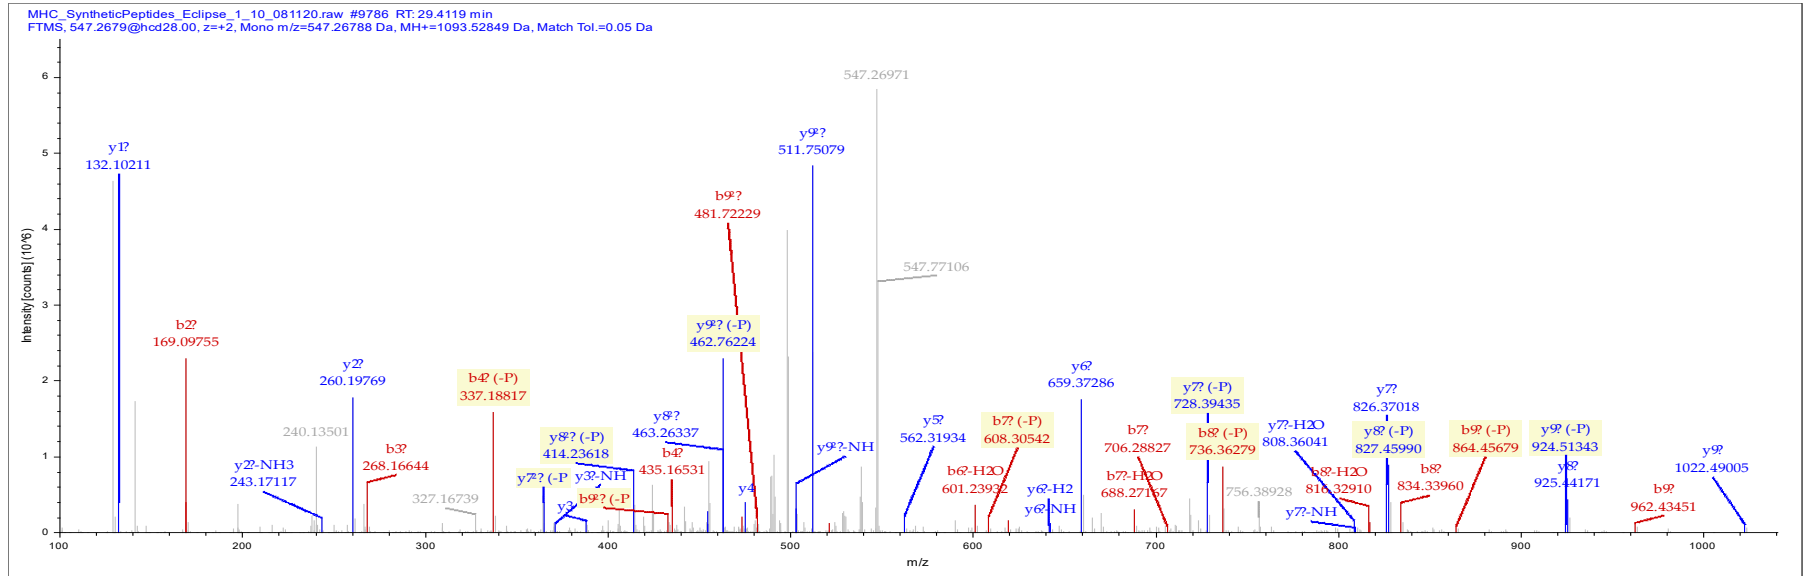

Experimental

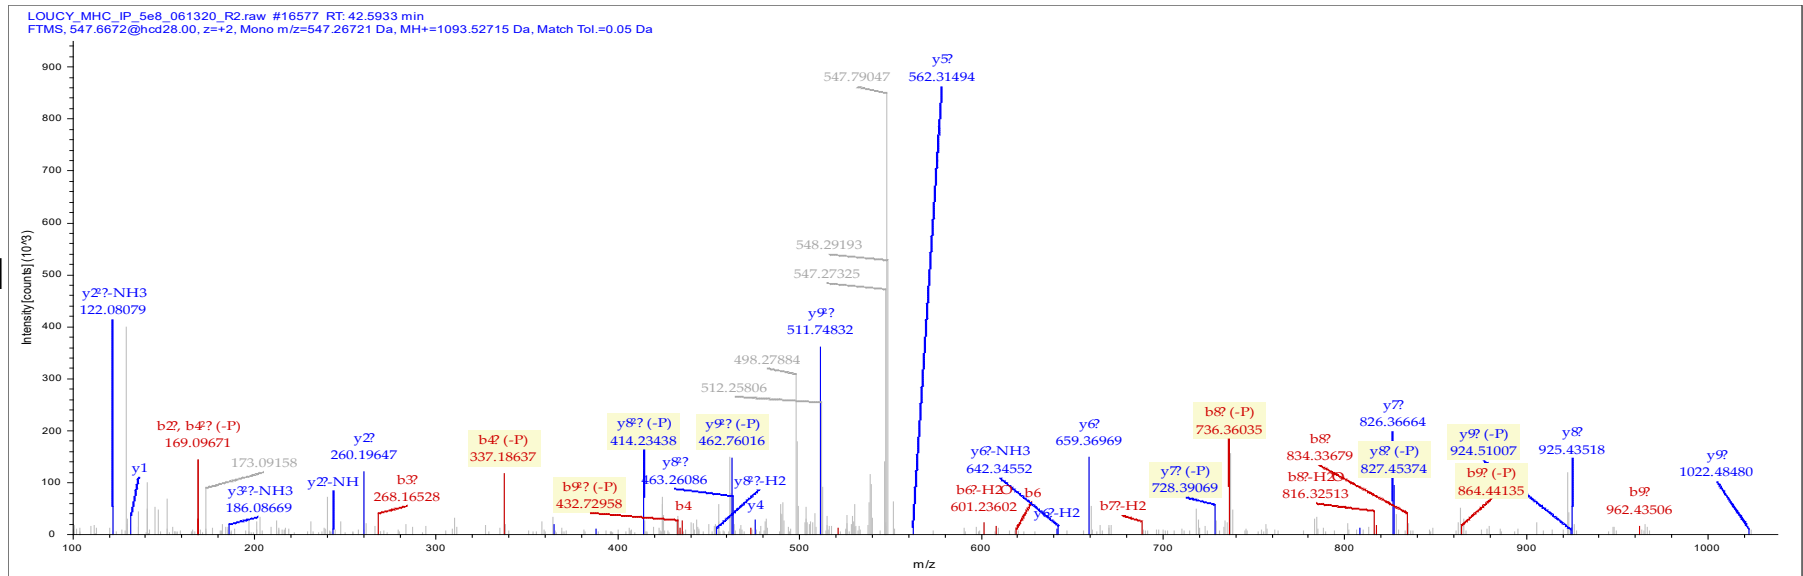

# EELSPTAKF – Phospho

Synthetic

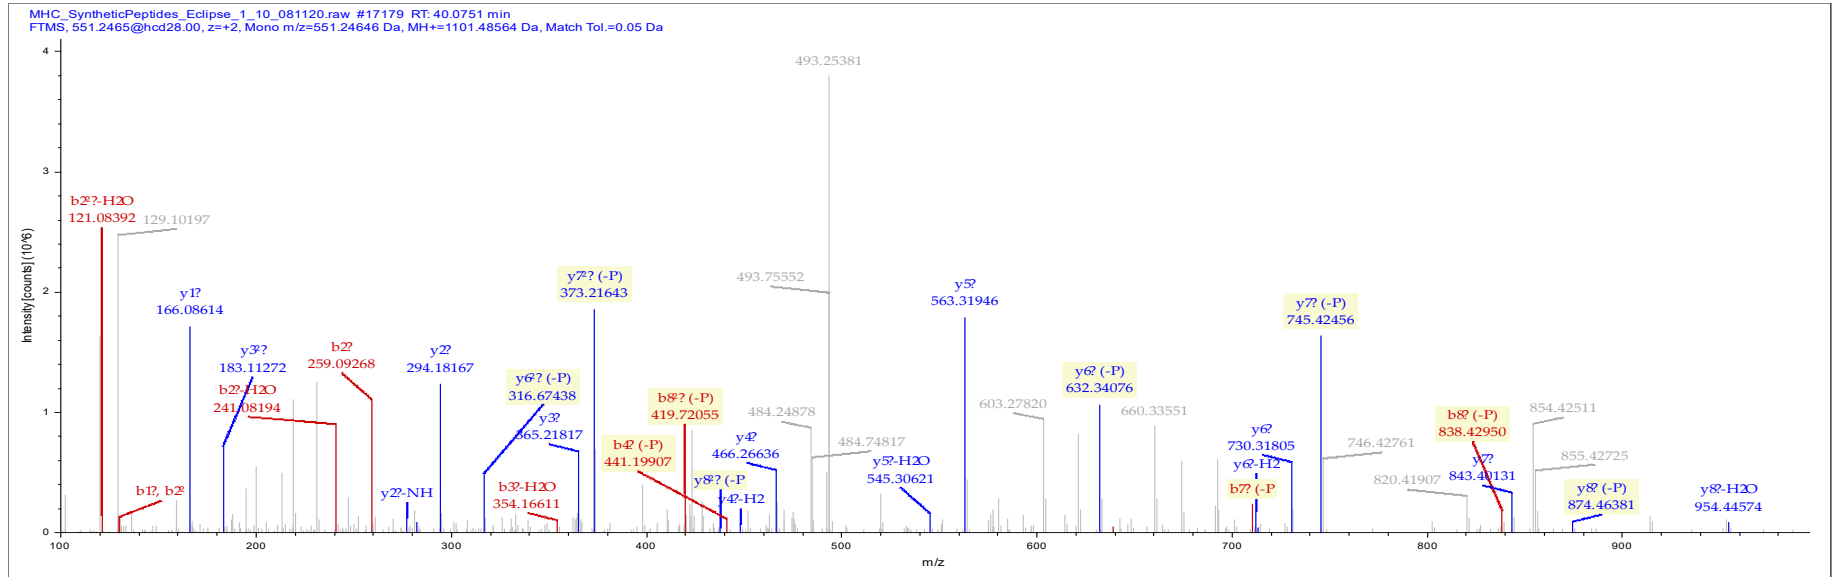

Experimental

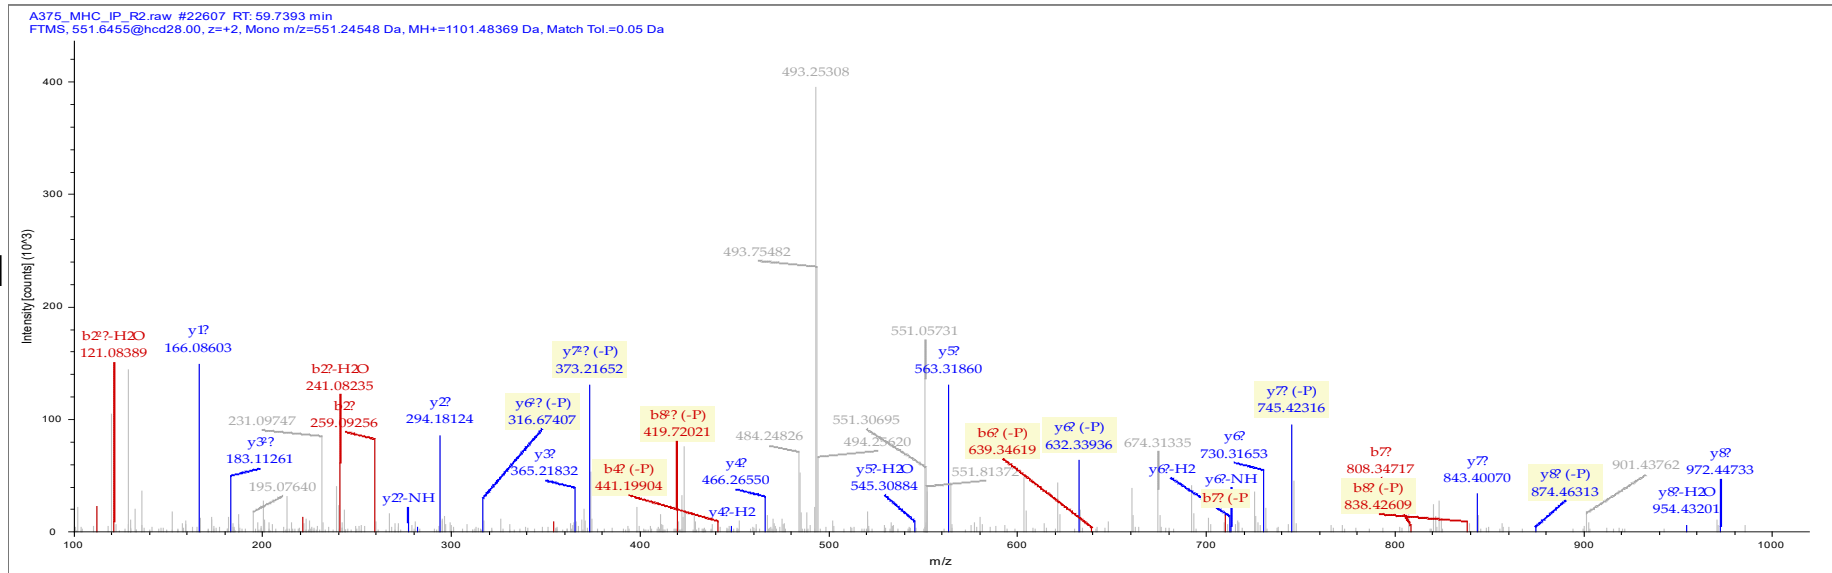

# GENSGIGKLF – Phospho

Synthetic

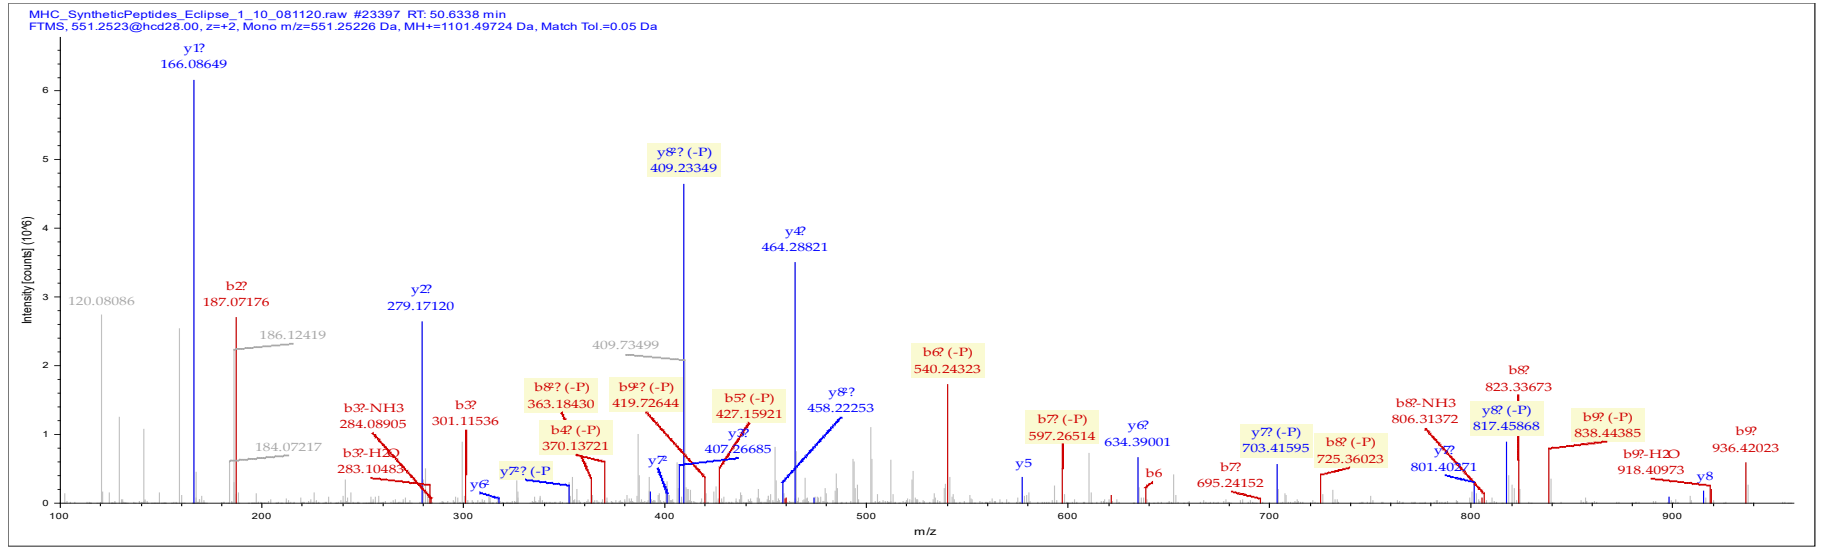

Experimental

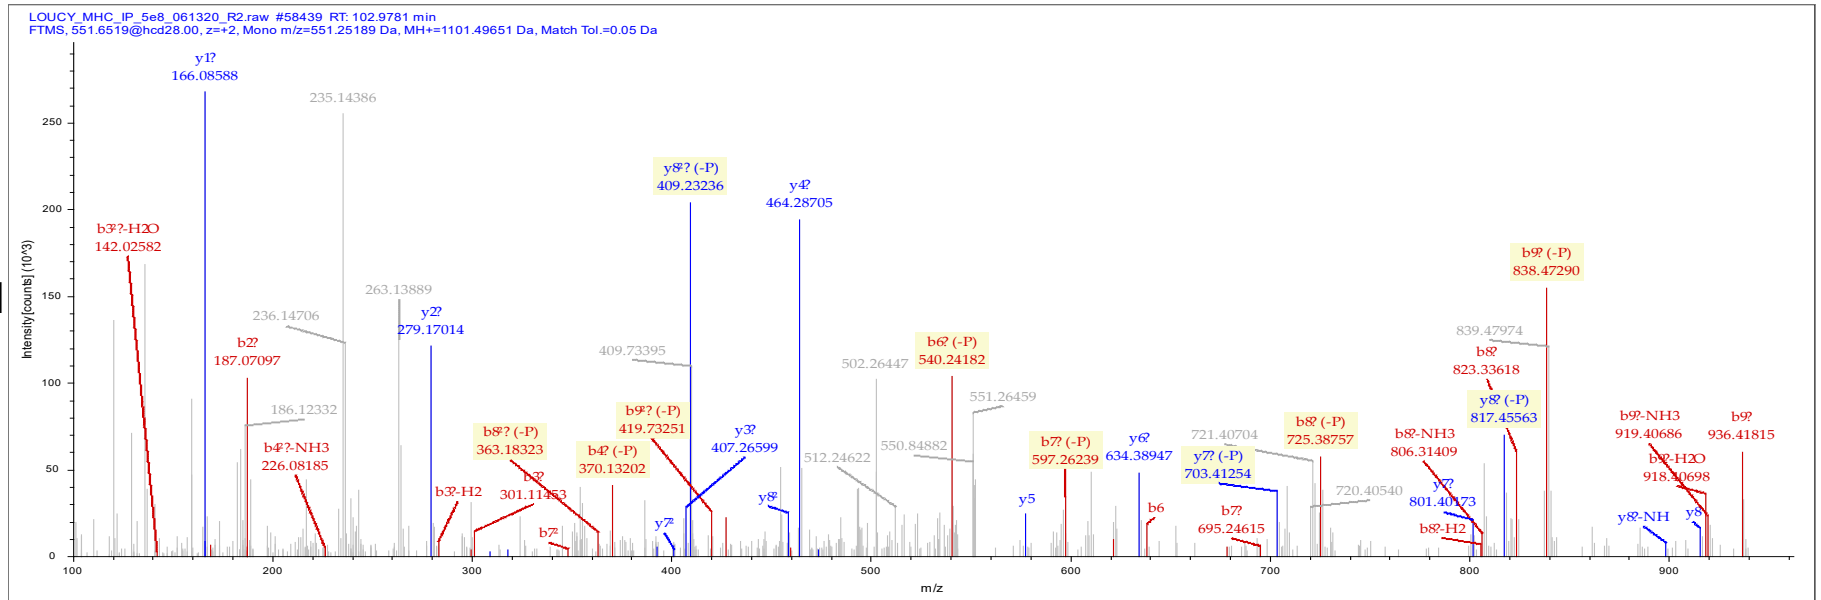

# GEWSASLPHRF – Phospho

Synthetic

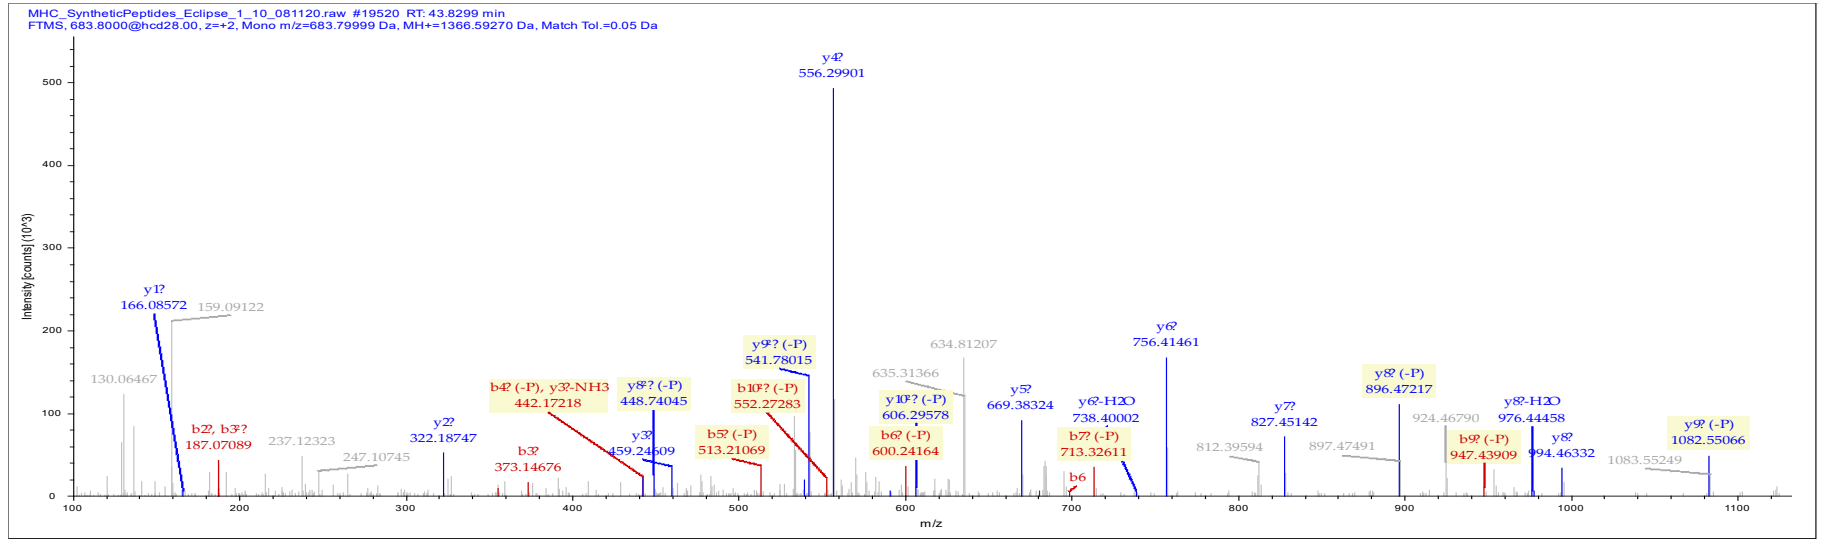

Experimental

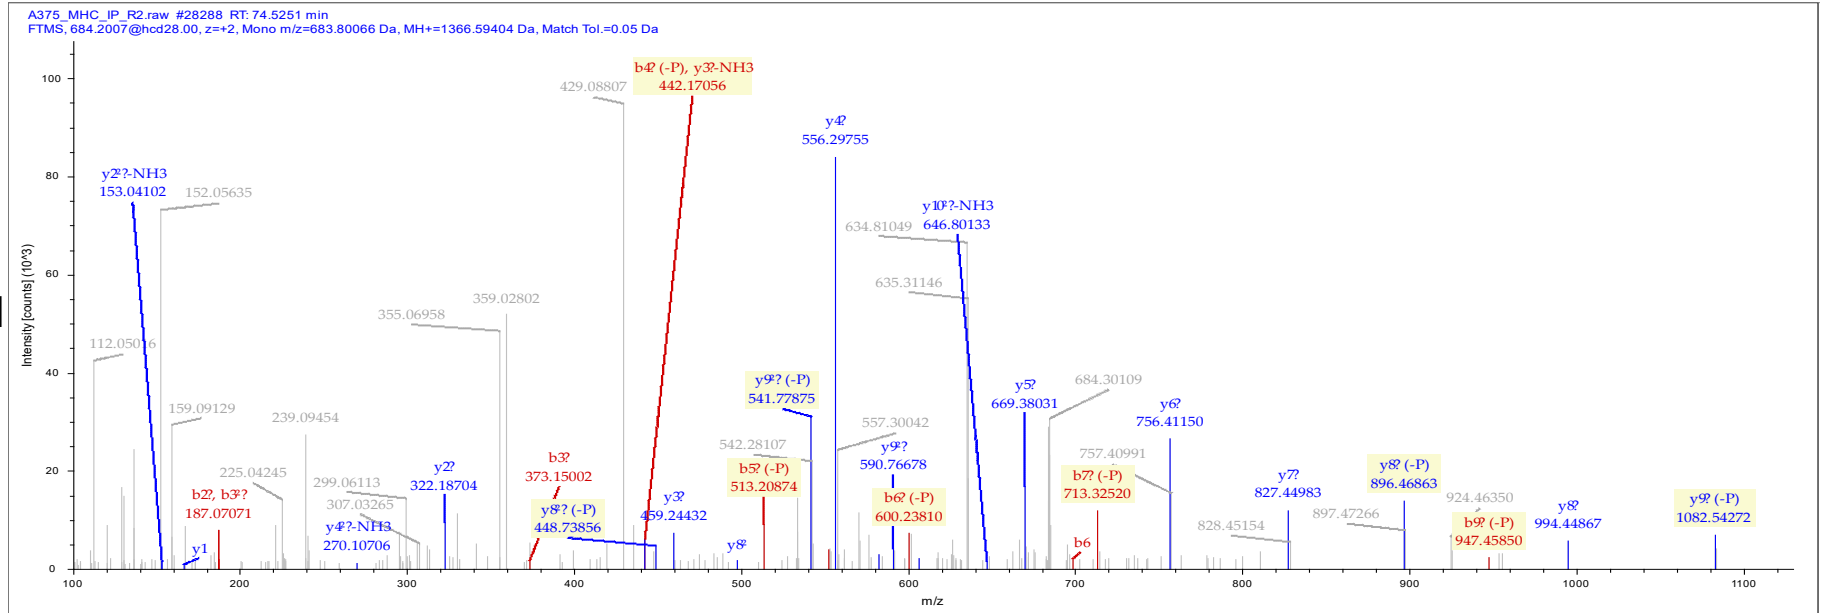



# ITQG**T**PLKY – Phospho

Synthetic

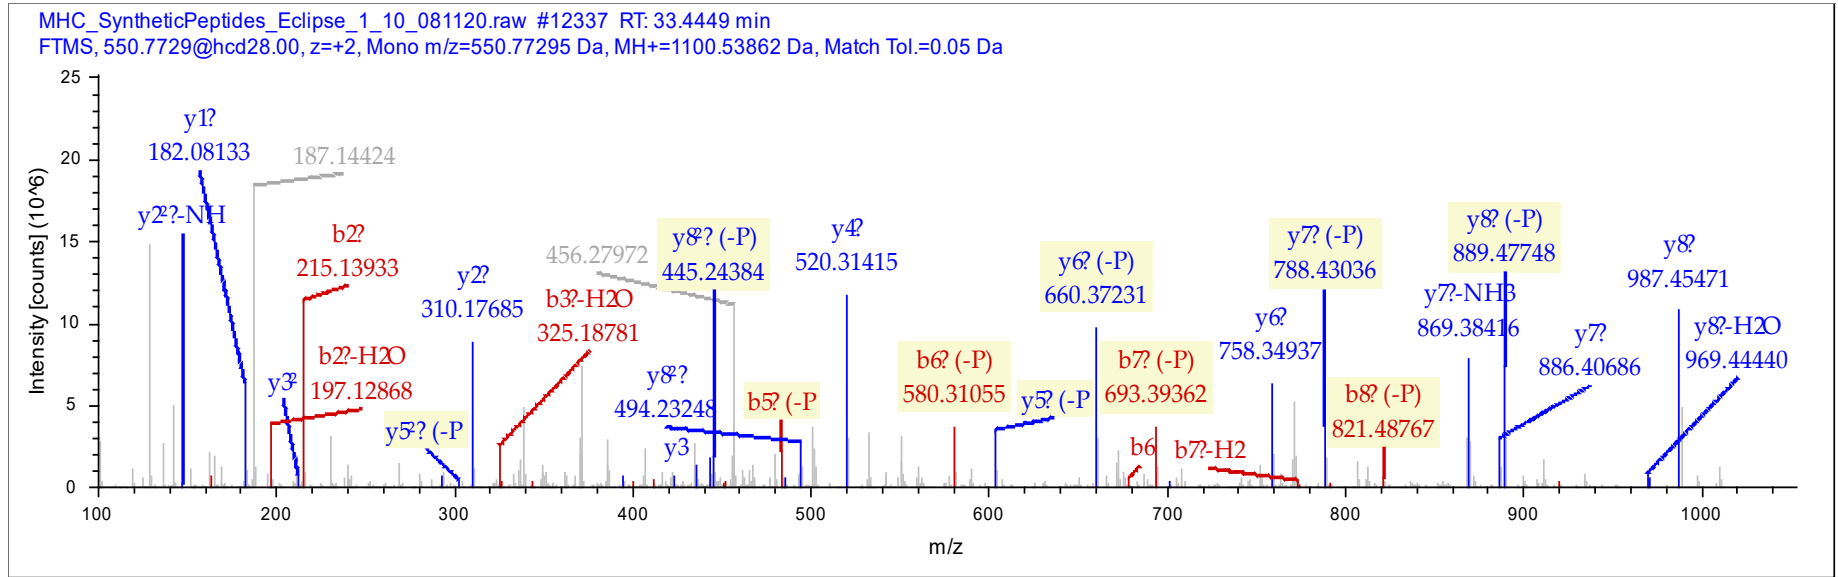

Experimental

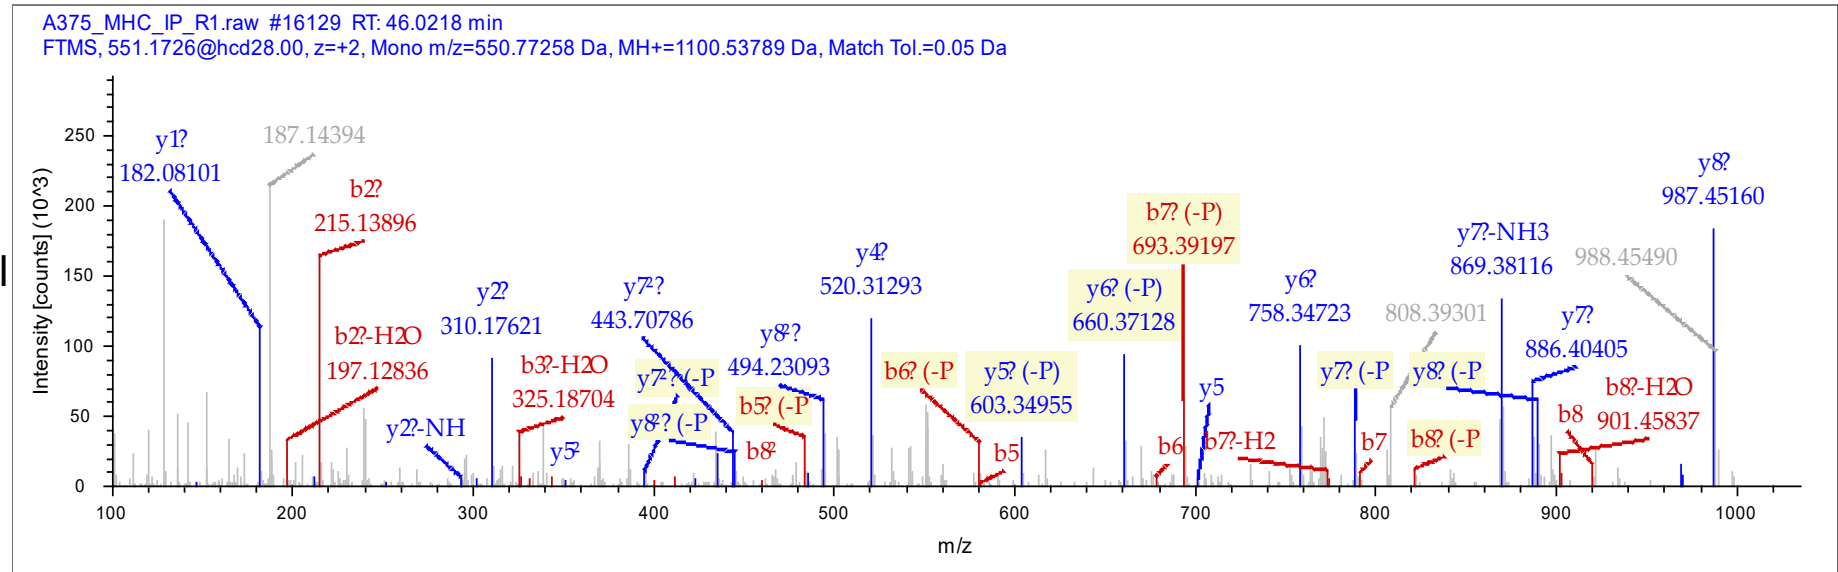

# KAFSPVRSV – Phospho

Synthetic

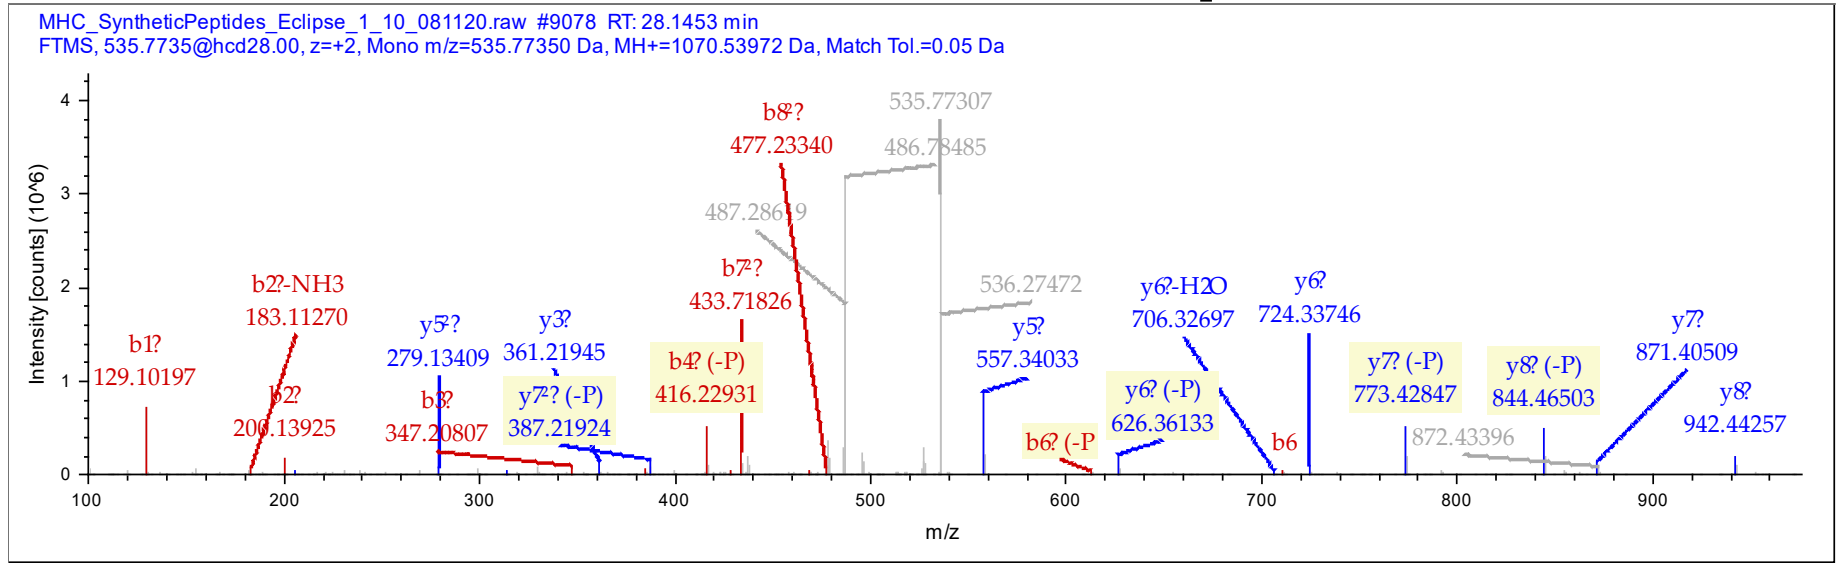

Experimental

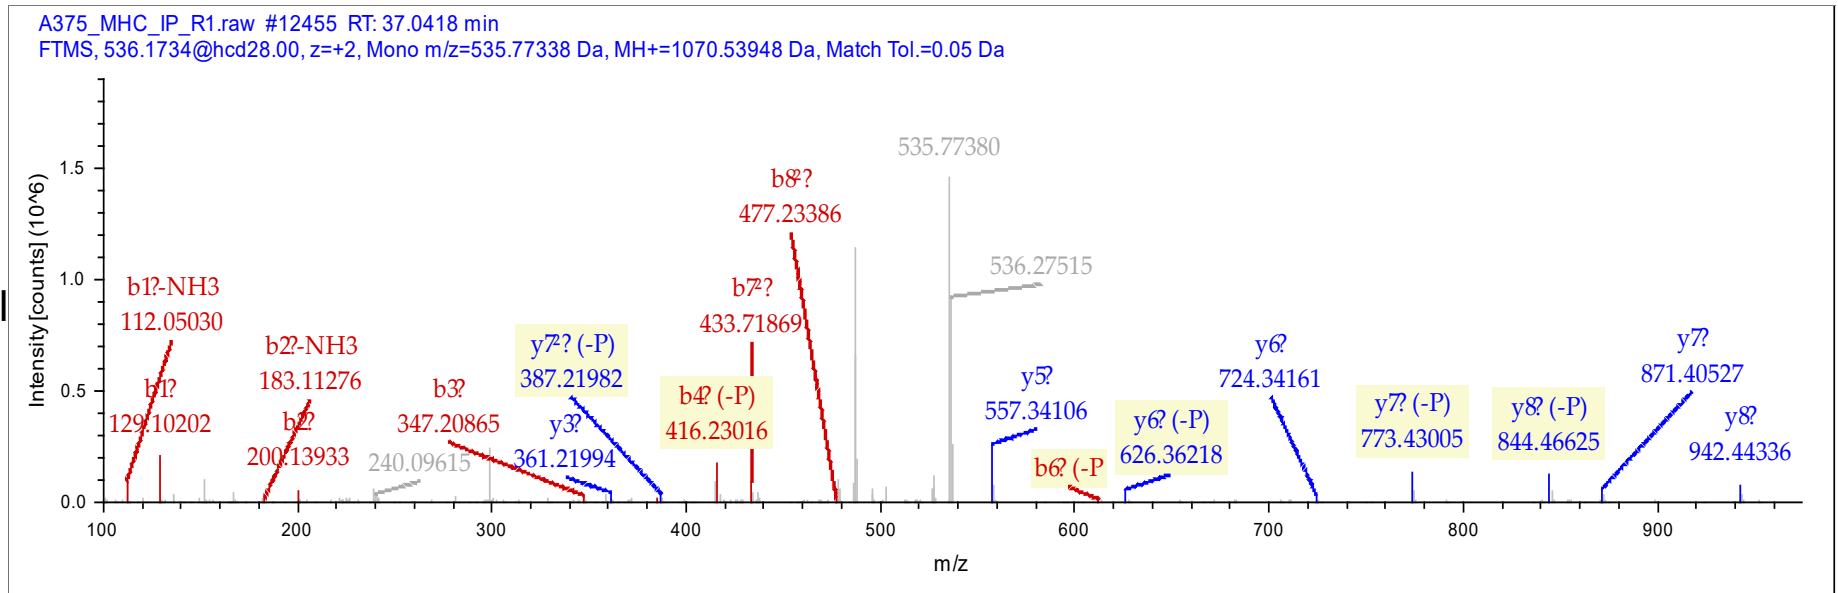

# KAITPPQQPY – Phospho

Synthetic

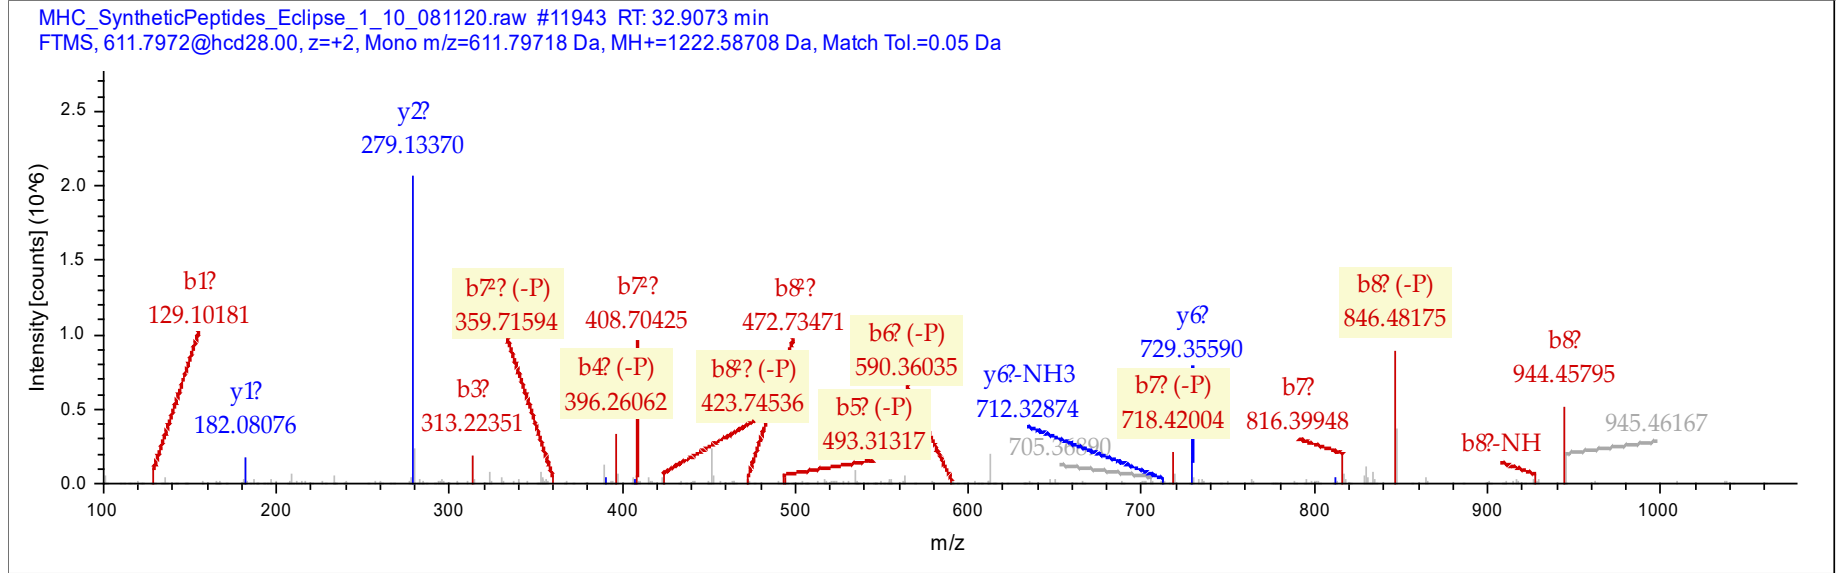

Experimental

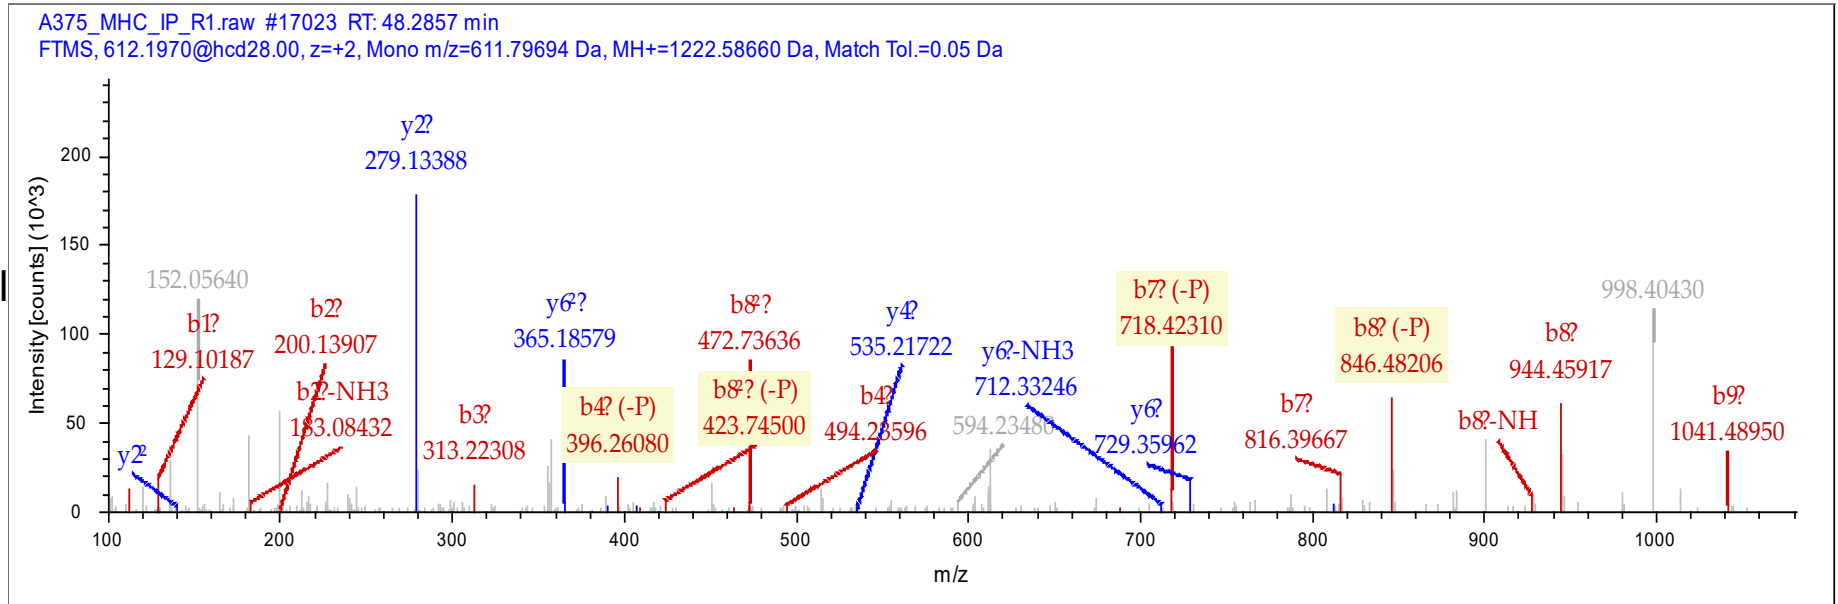

# KLFSPSKEAEL – Phospho

Synthetic

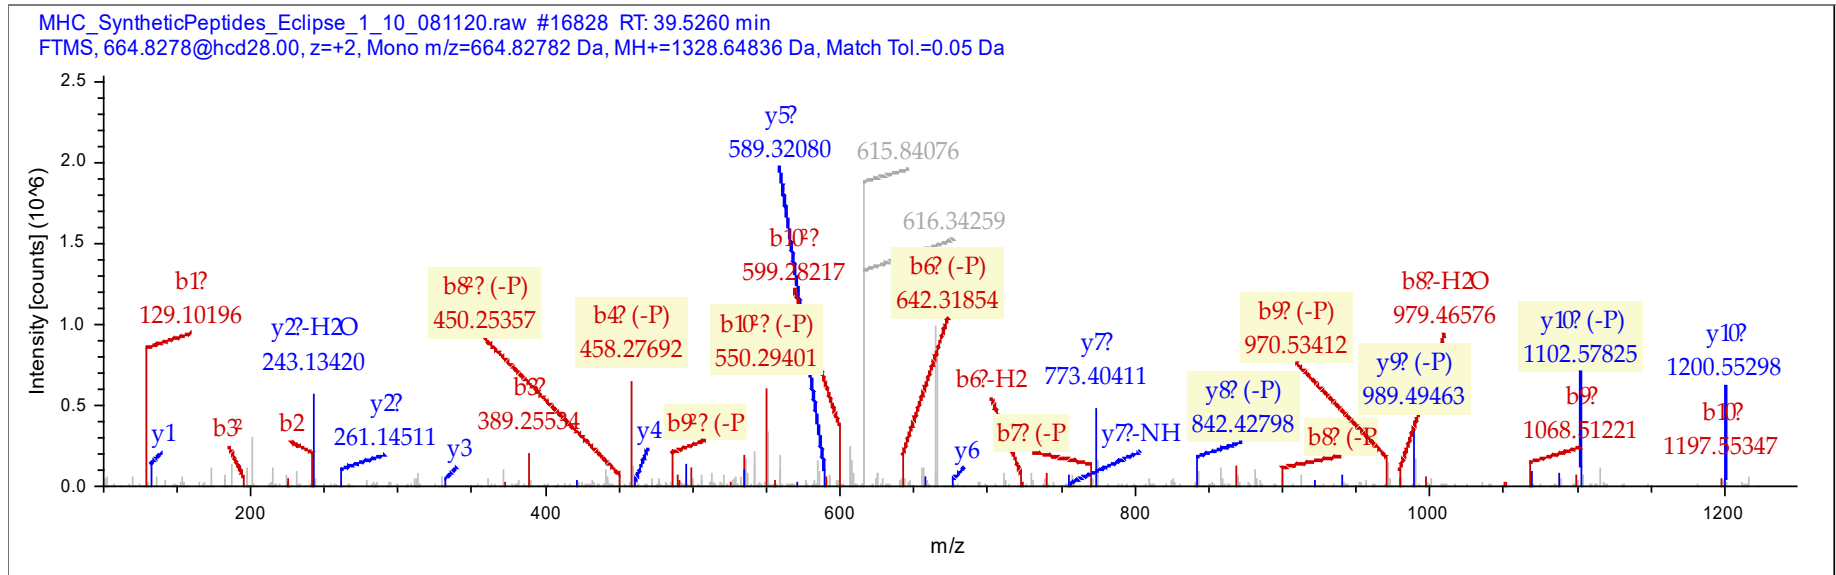

Experimental

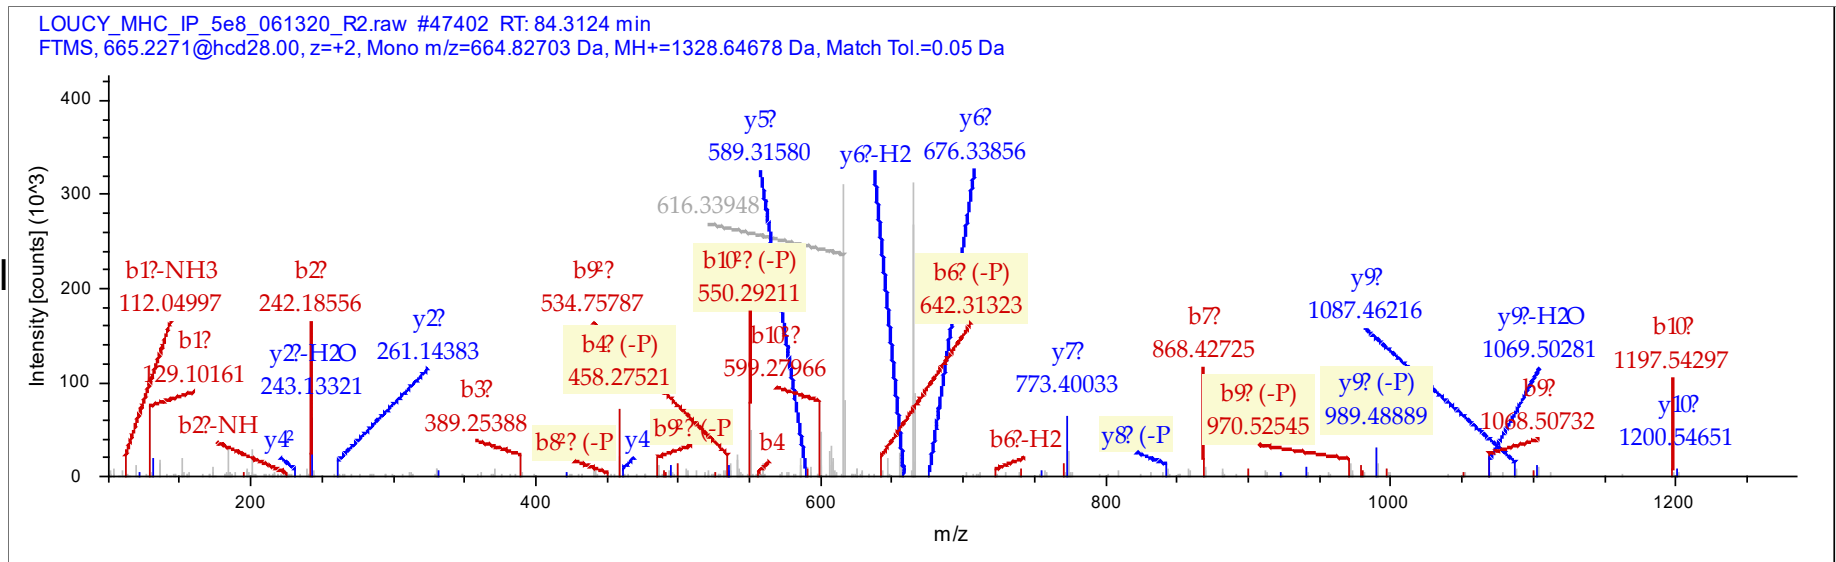

# LPASPAHQL – Phospho

Synthetic

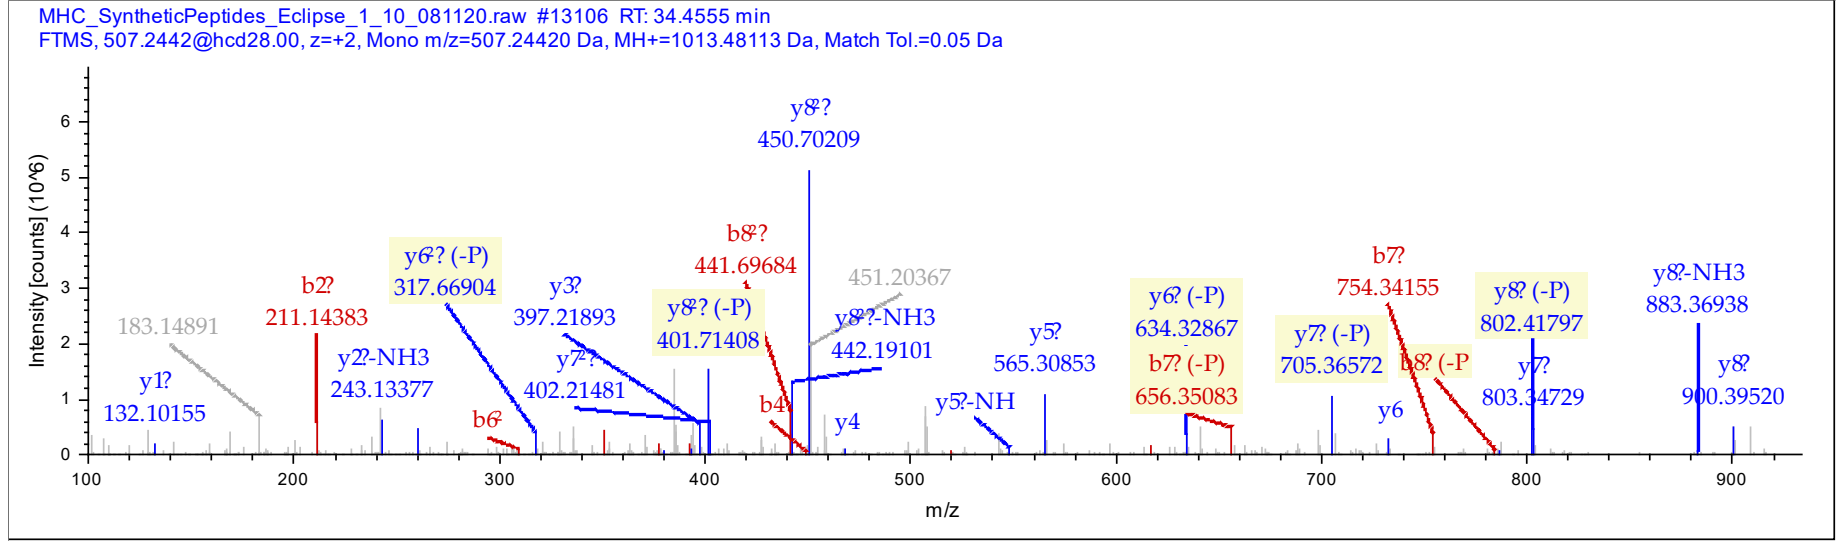

Experimental

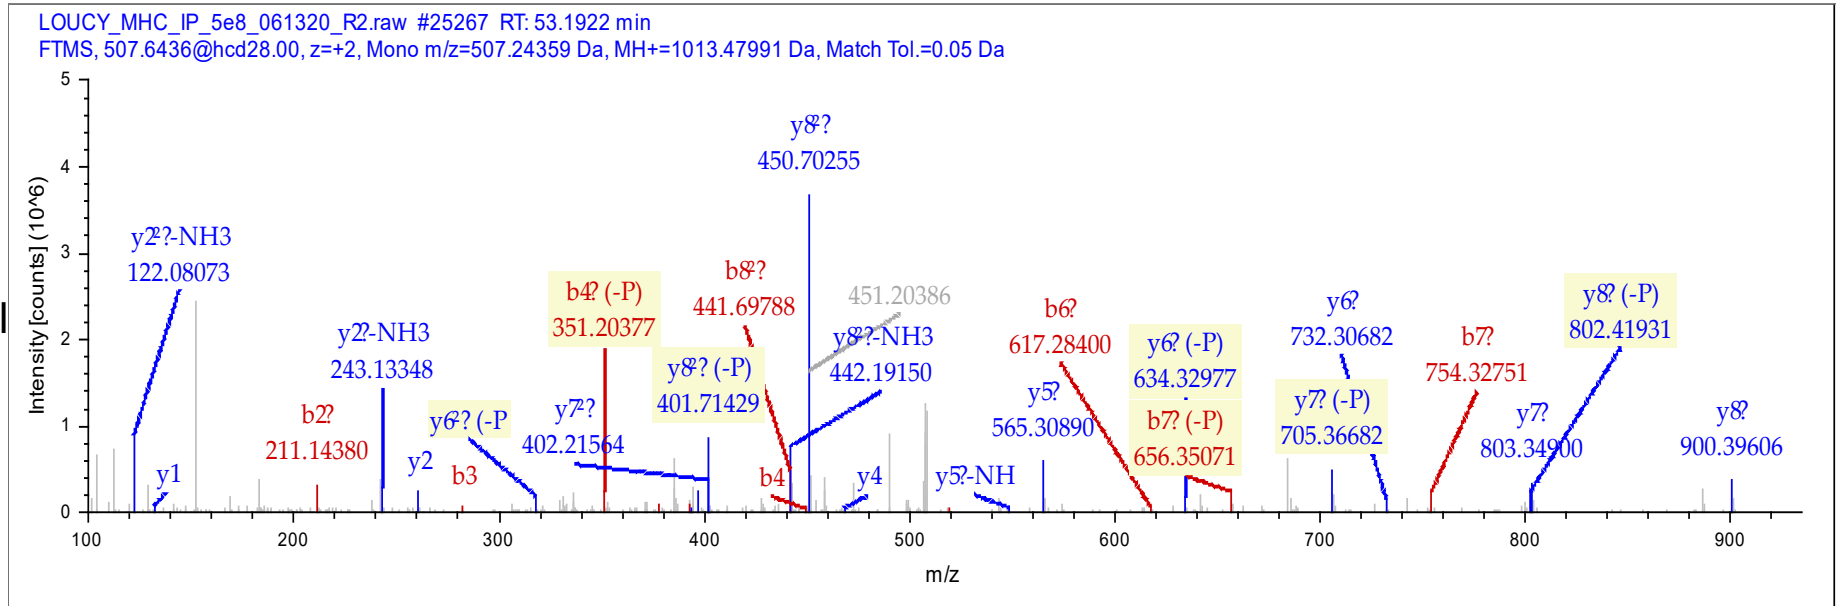

# KRFSGTVRL – Phospho

Synthetic

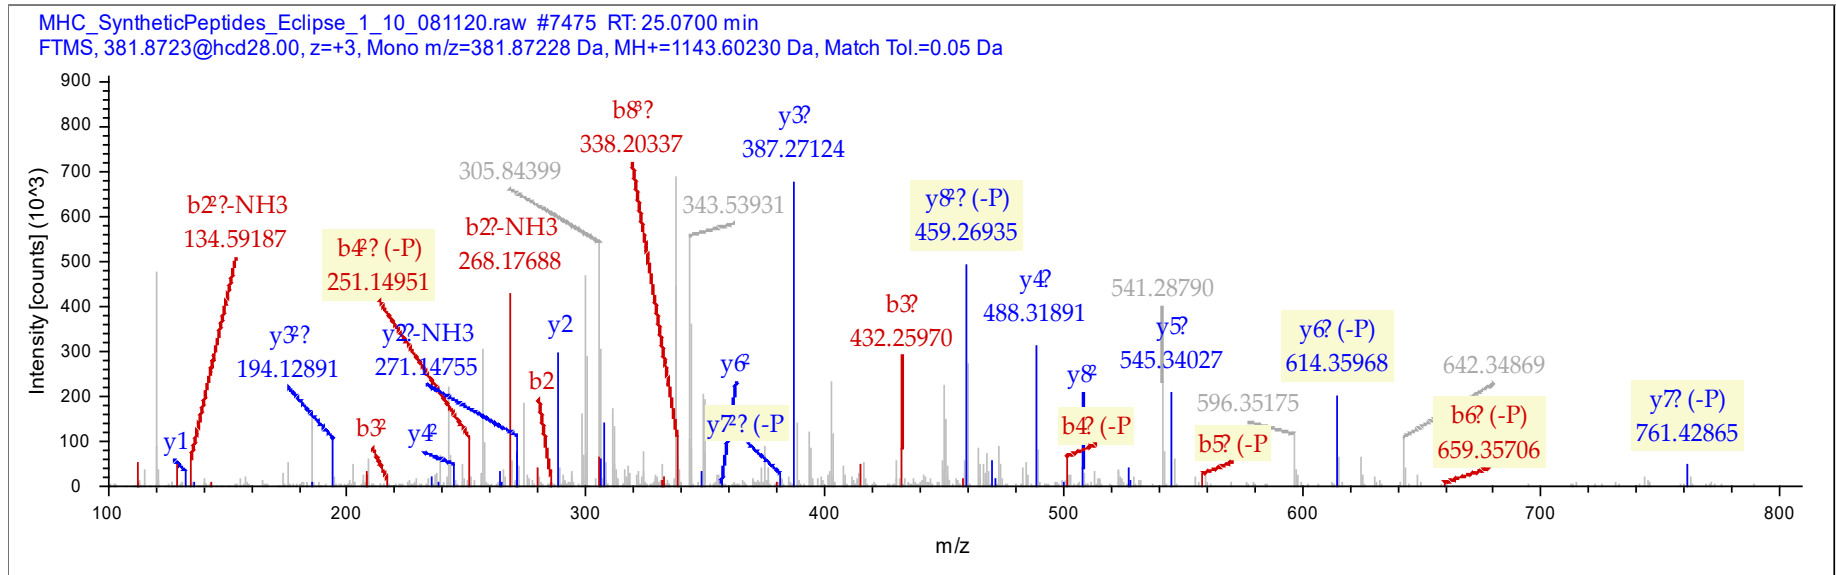

Experimental

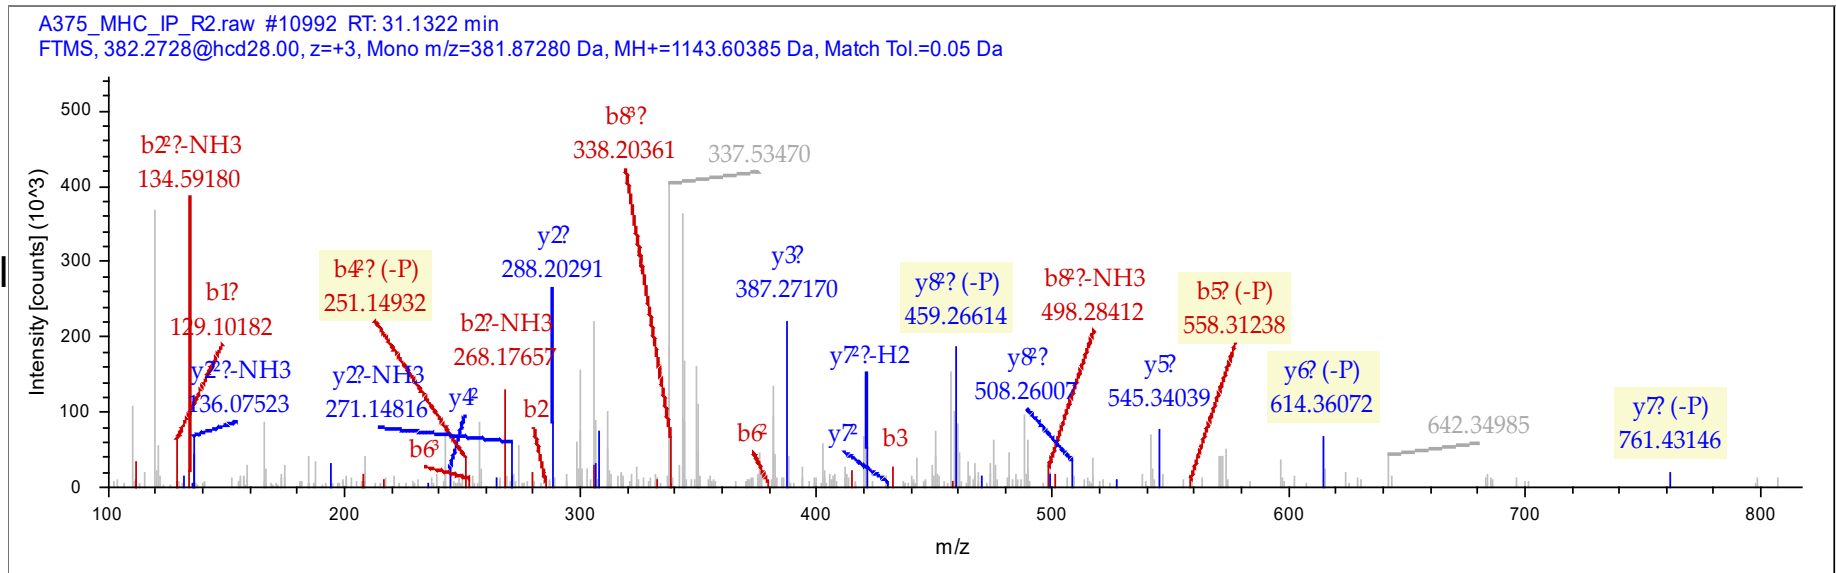

# NTDSPLRY – Phospho

Synthetic

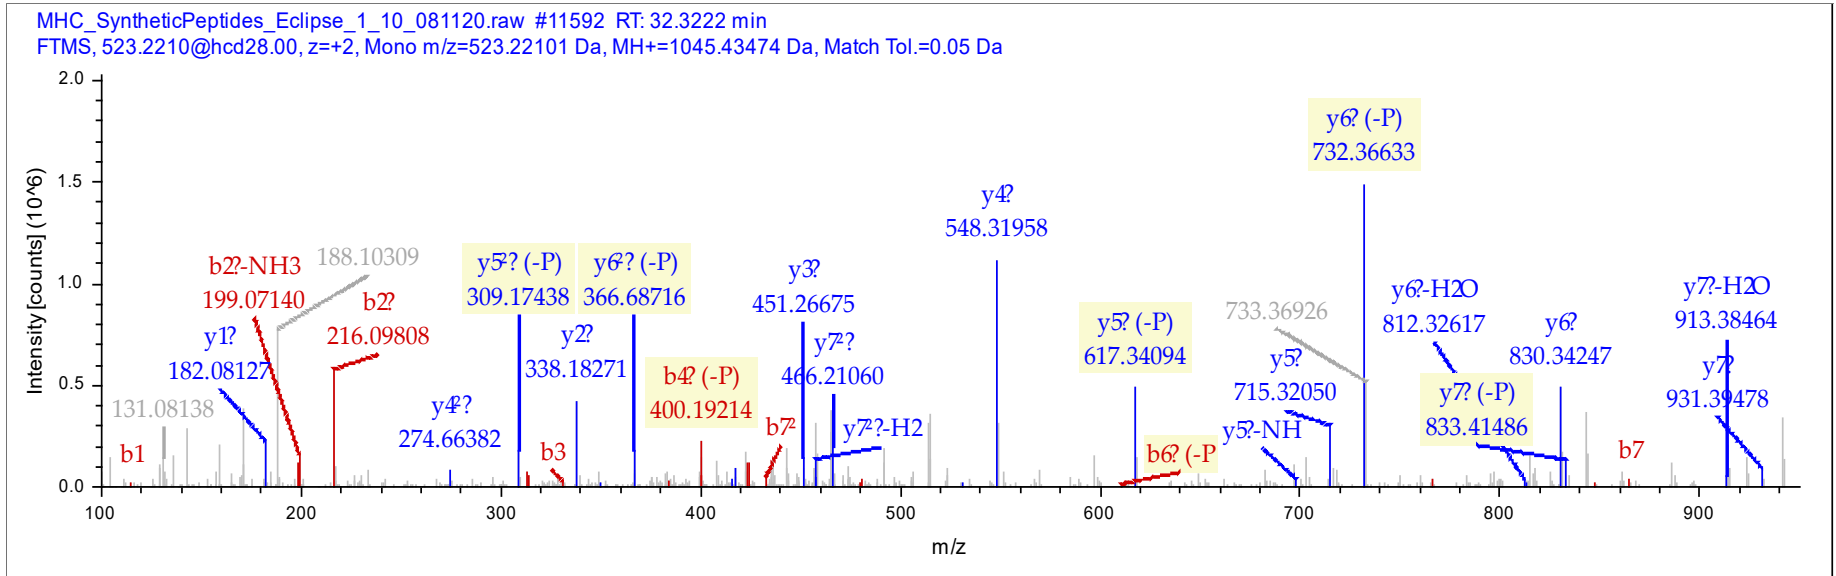

Experimental

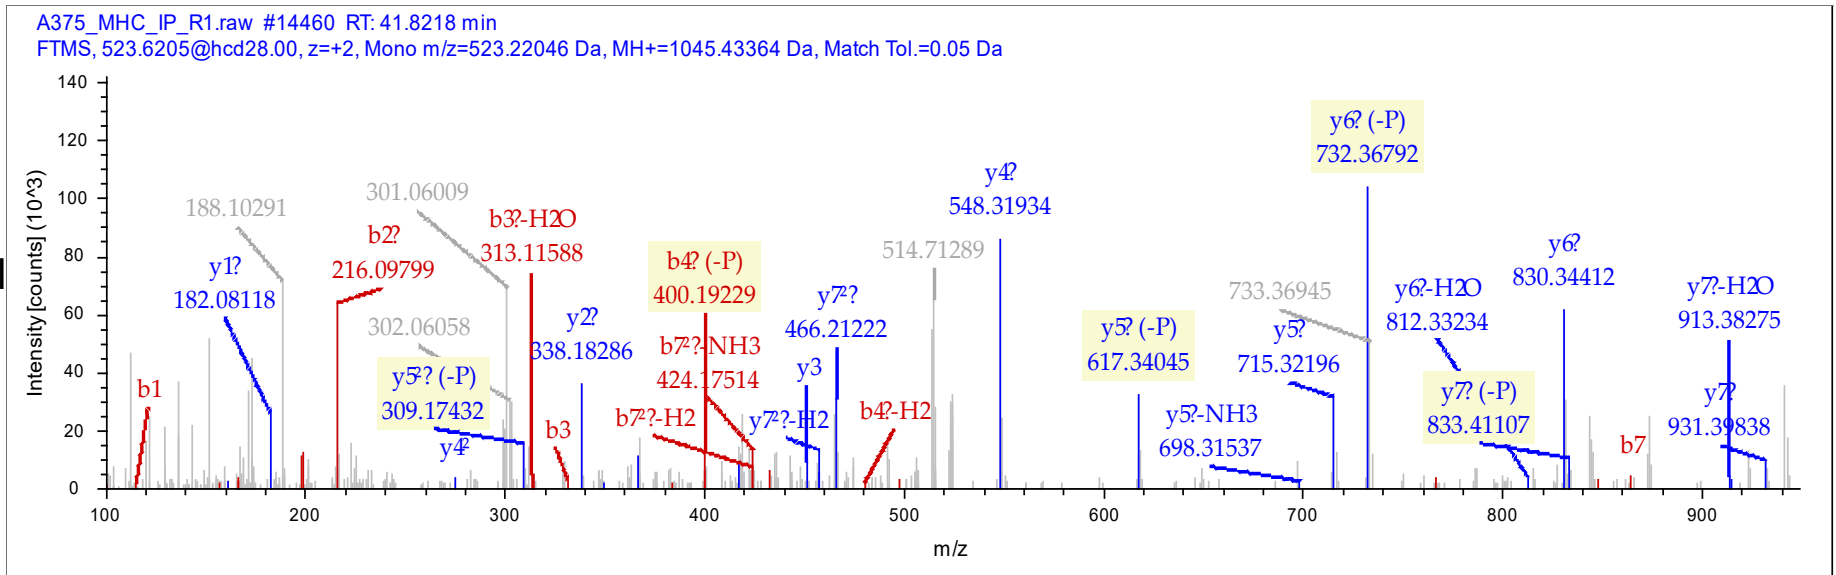

# RPYSPFFSL – Phospho

Synthetic

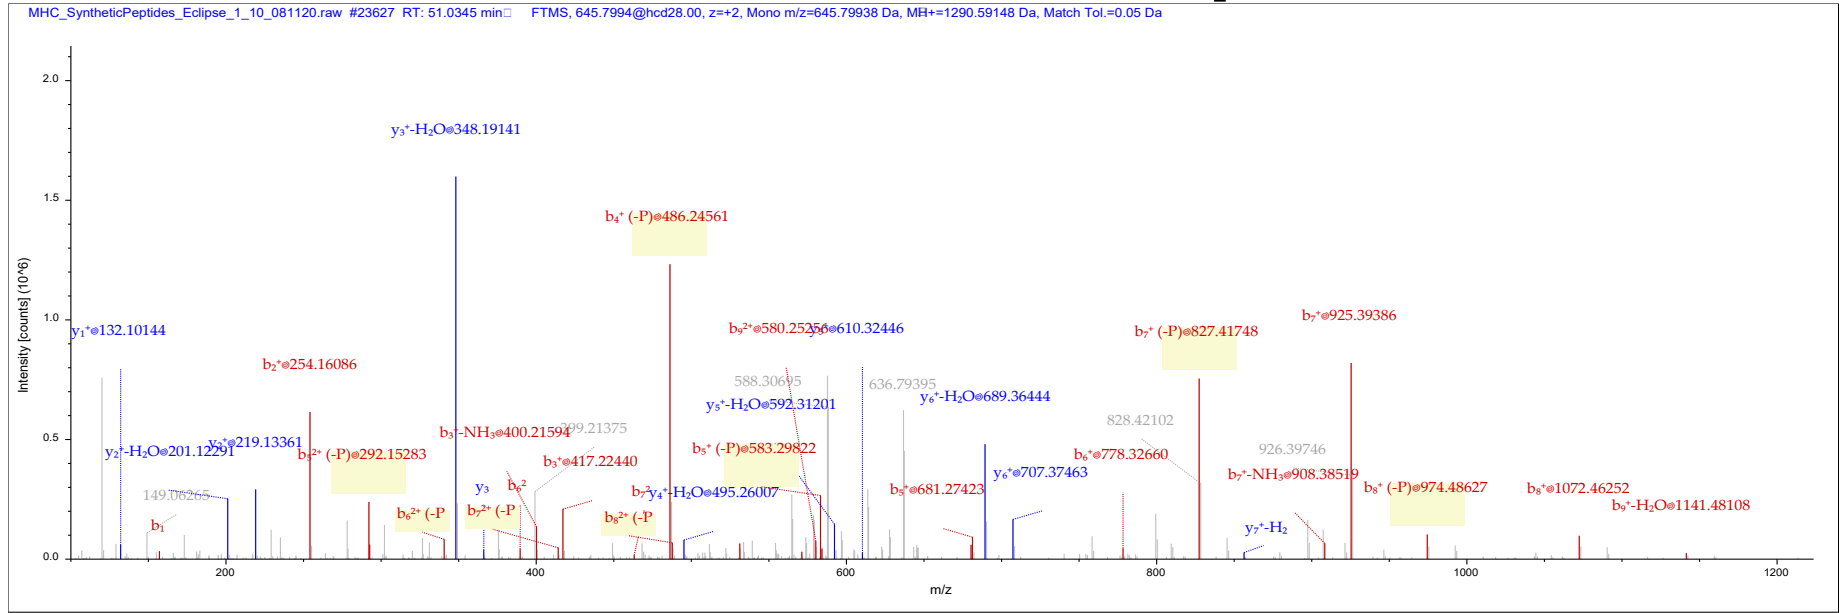

Experimental

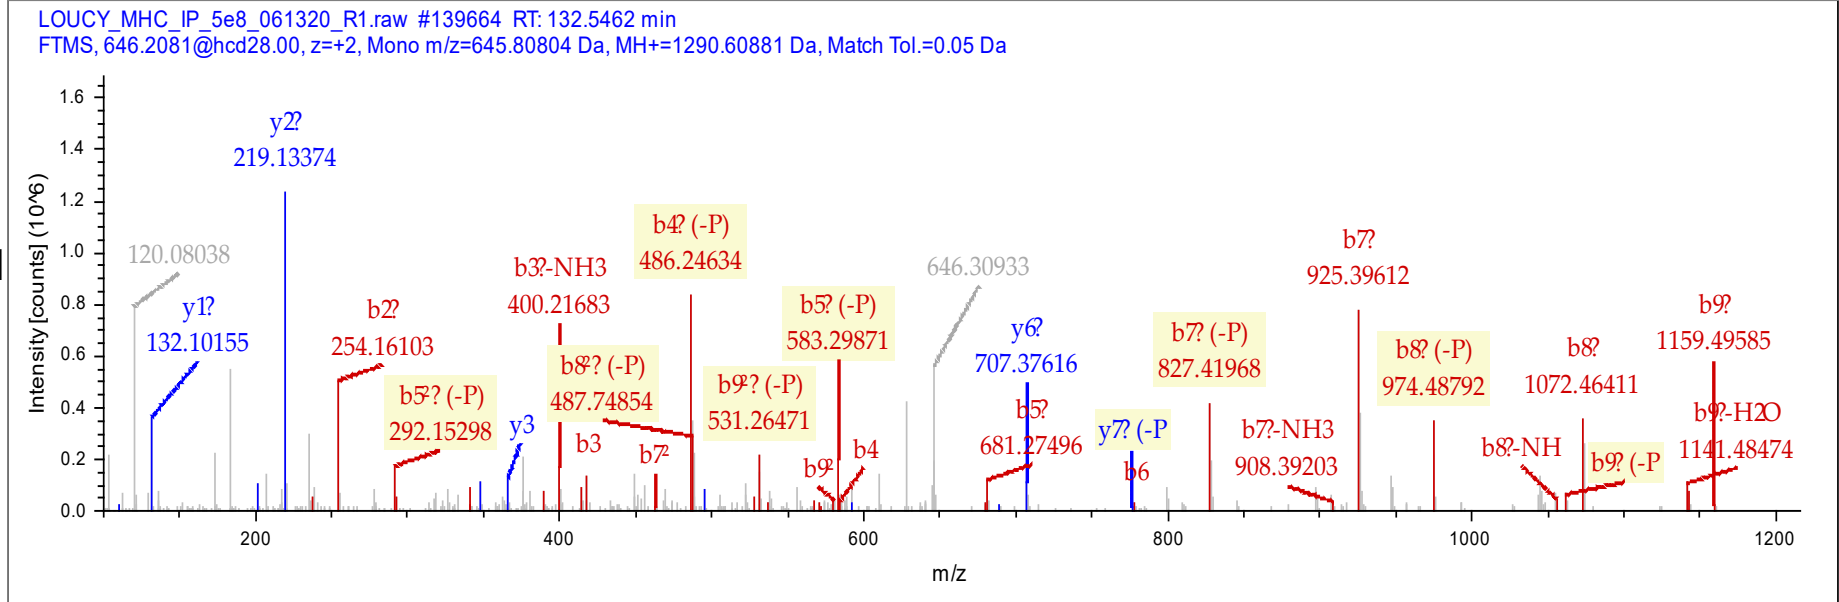



# RLFSKELRC – Phospho

Synthetic

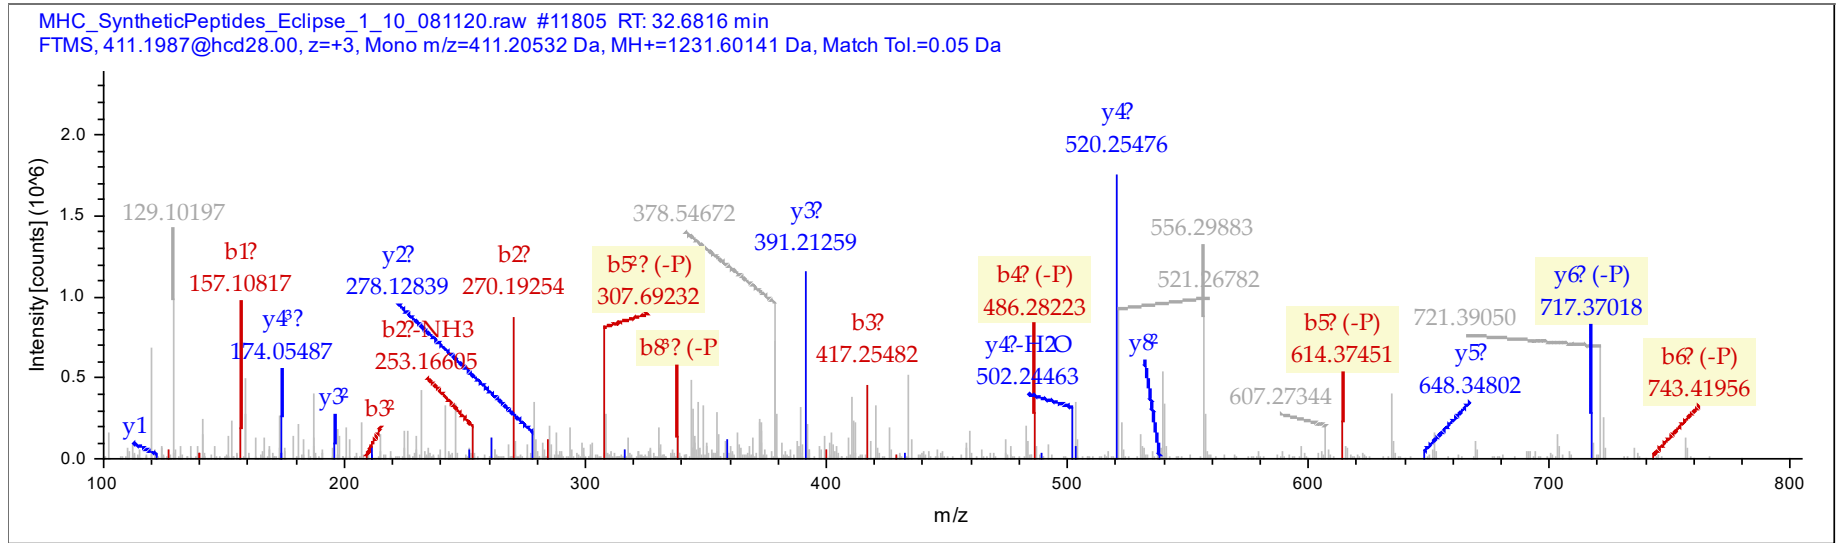

Experimental

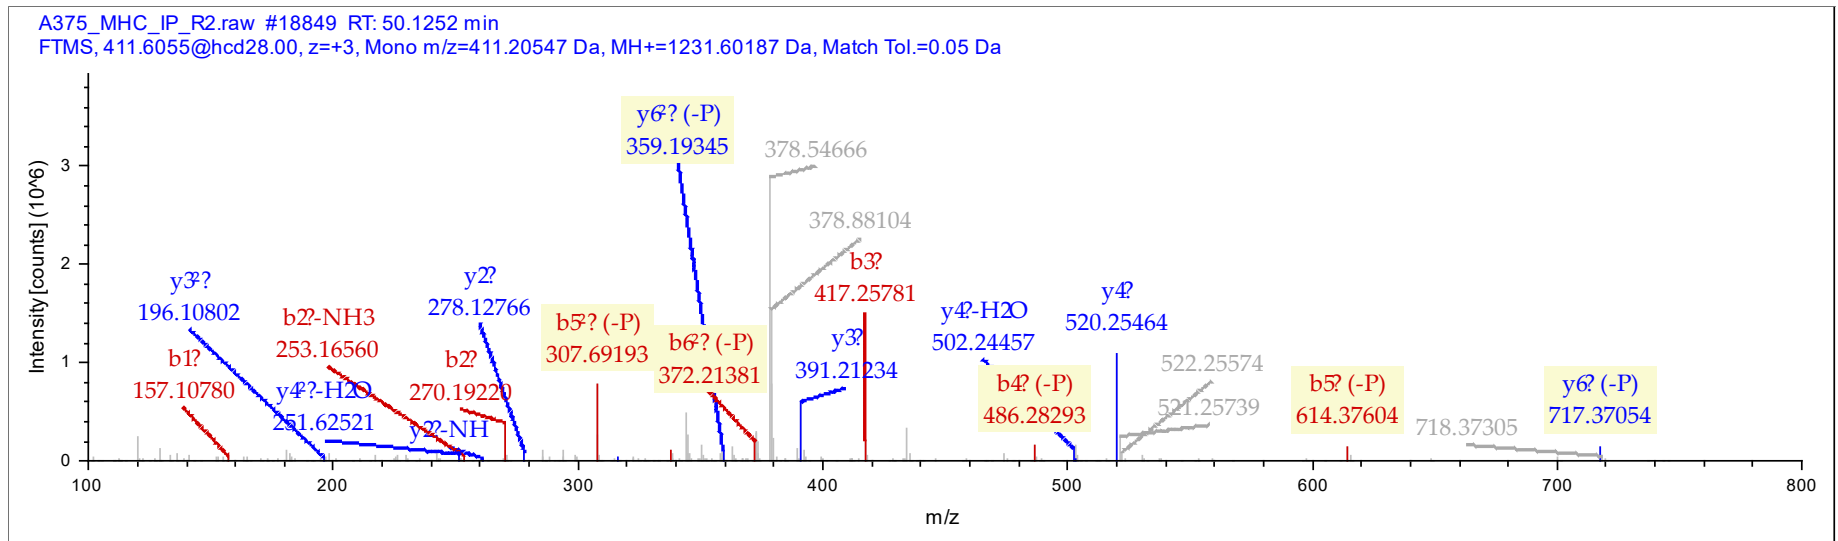

# RQISQDVKL – Phospho

Synthetic

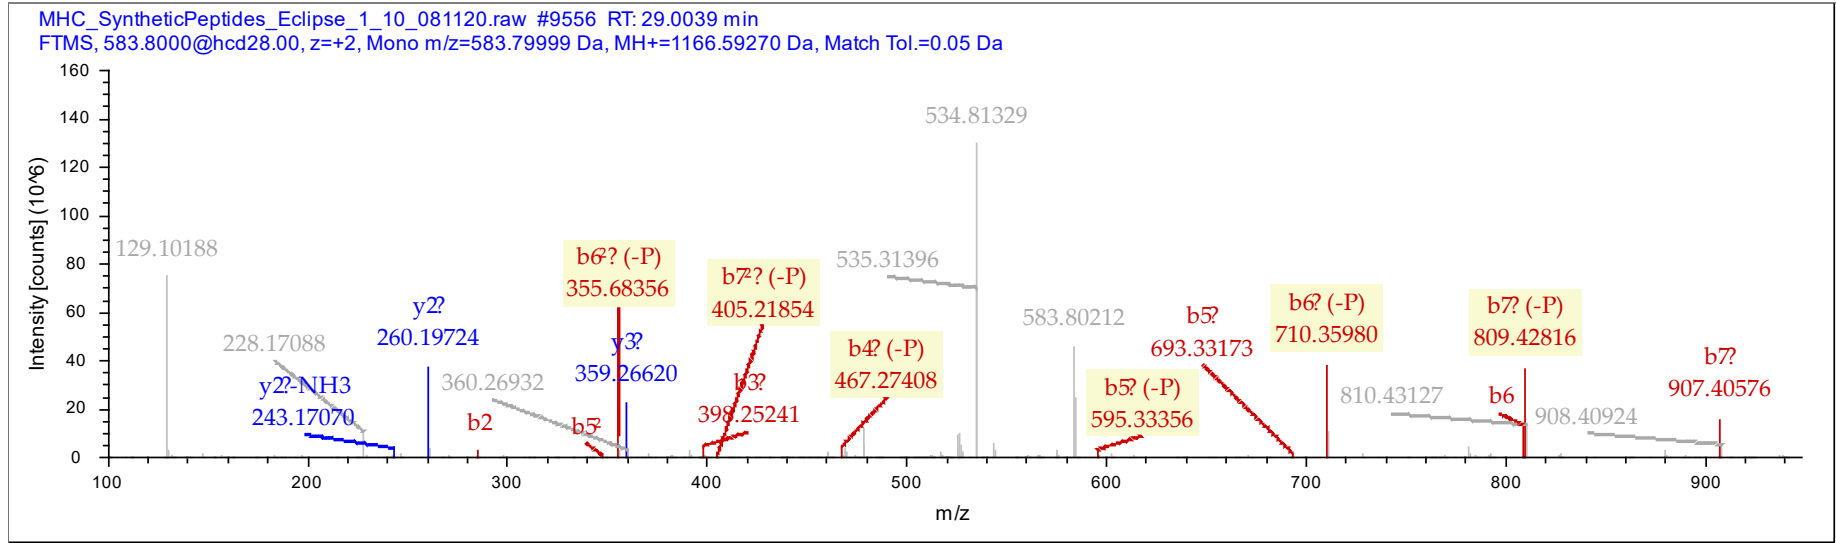

Experimental

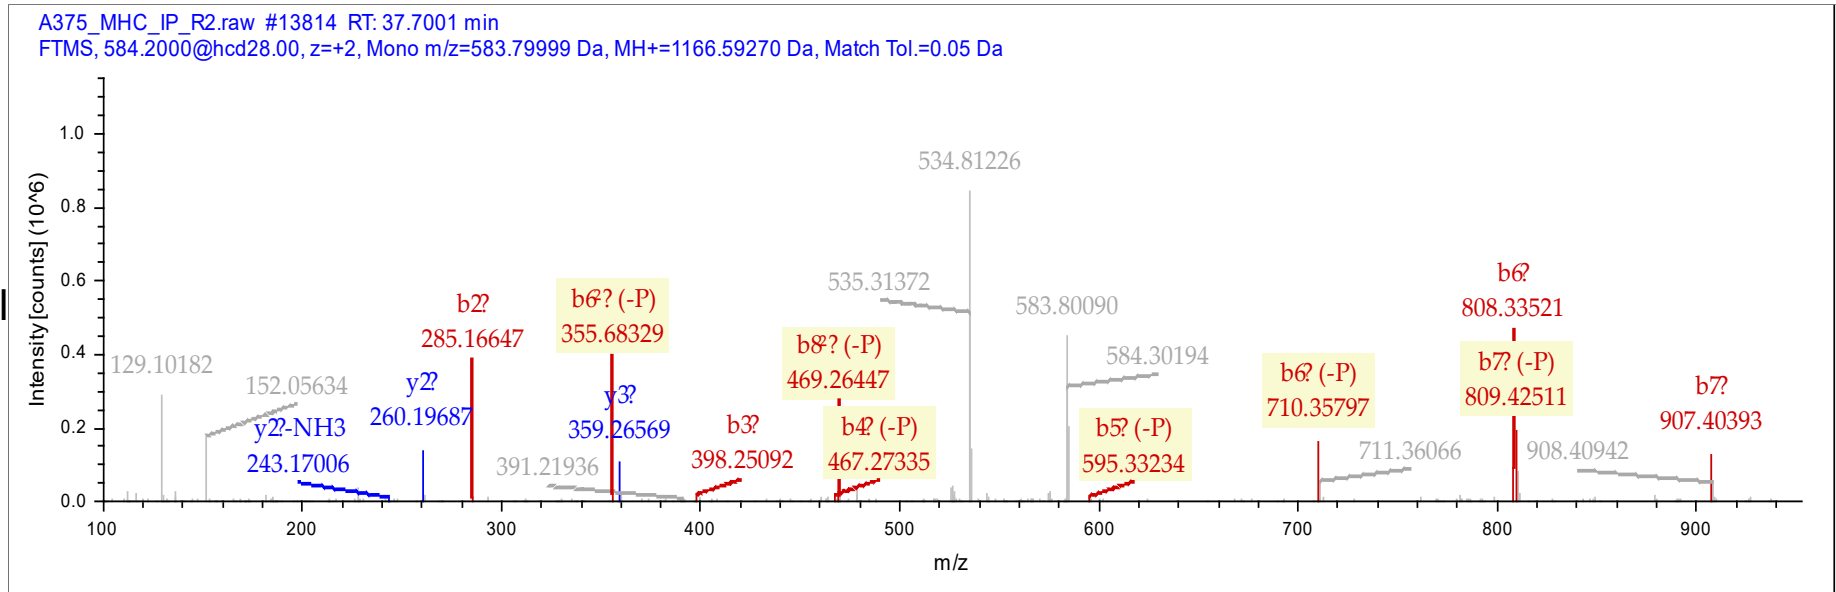

# SDVSLTACKV – Phospho

MHC\_SyntheticPeptides\_Eclipse\_1\_10\_081120.raw #18304 RT: 41.8701 min  
FTMS, 551.7454@hcd28.00, z=+2, Mono m/z=551.74542 Da, MH+=1102.48357 Da, Match Tol.=0.05 Da

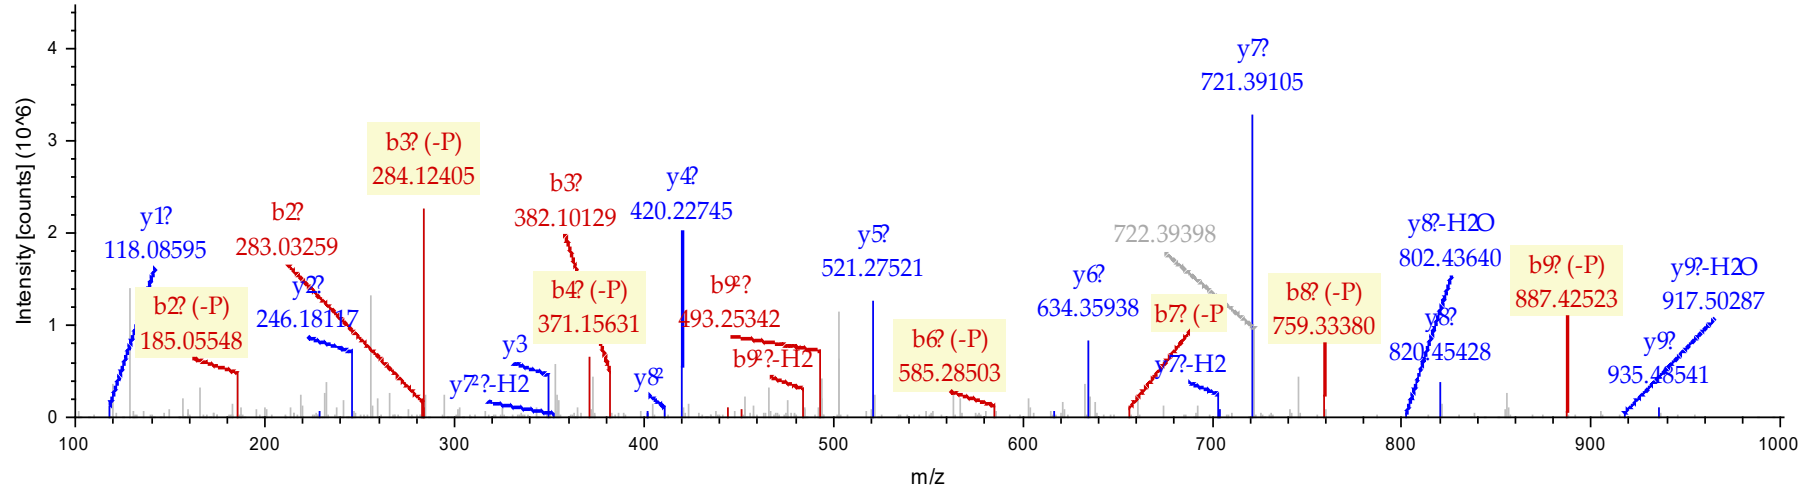

LOUCY\_MHC\_IP\_5e8\_061320\_R1.raw #75441 RT: 79.5506 min  
FTMS, 552.1537@hcd28.00, z=+2, Mono m/z=551.75366 Da, MH+=1102.50005 Da, Match Tol.=0.05 Da

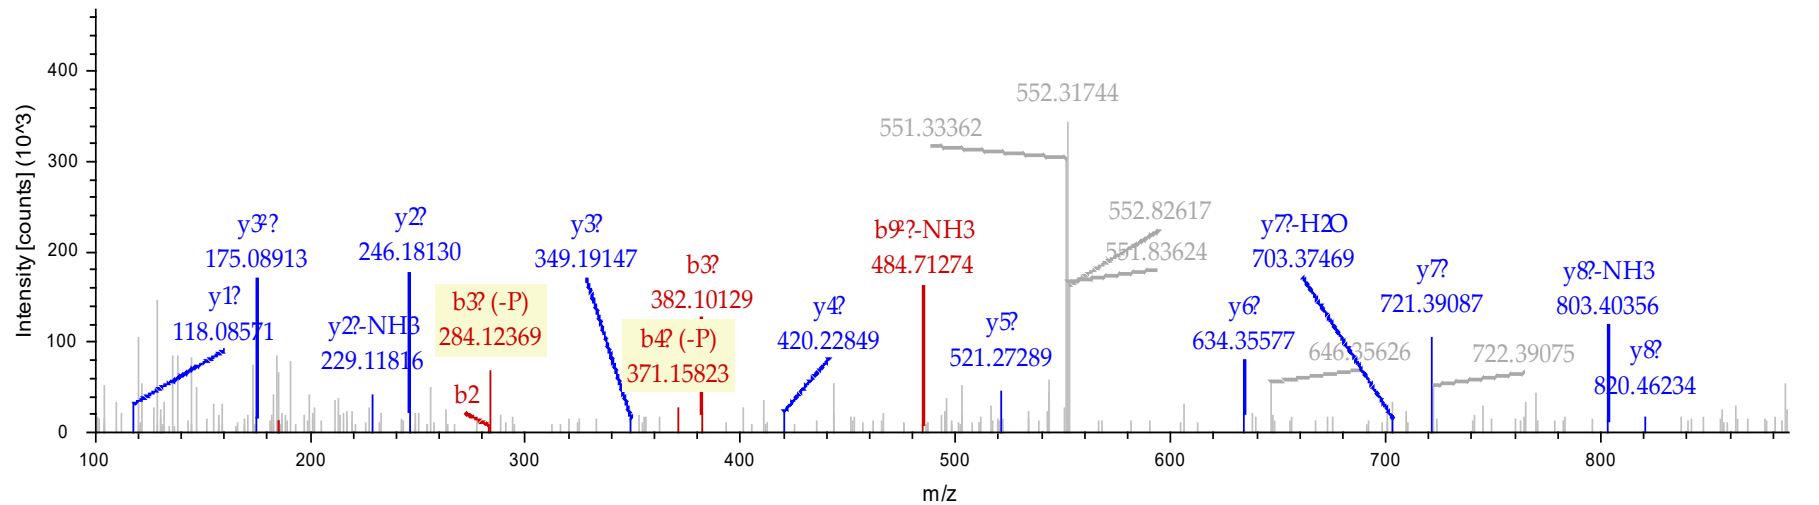

# SEASPSREAL – Phospho

Synthetic

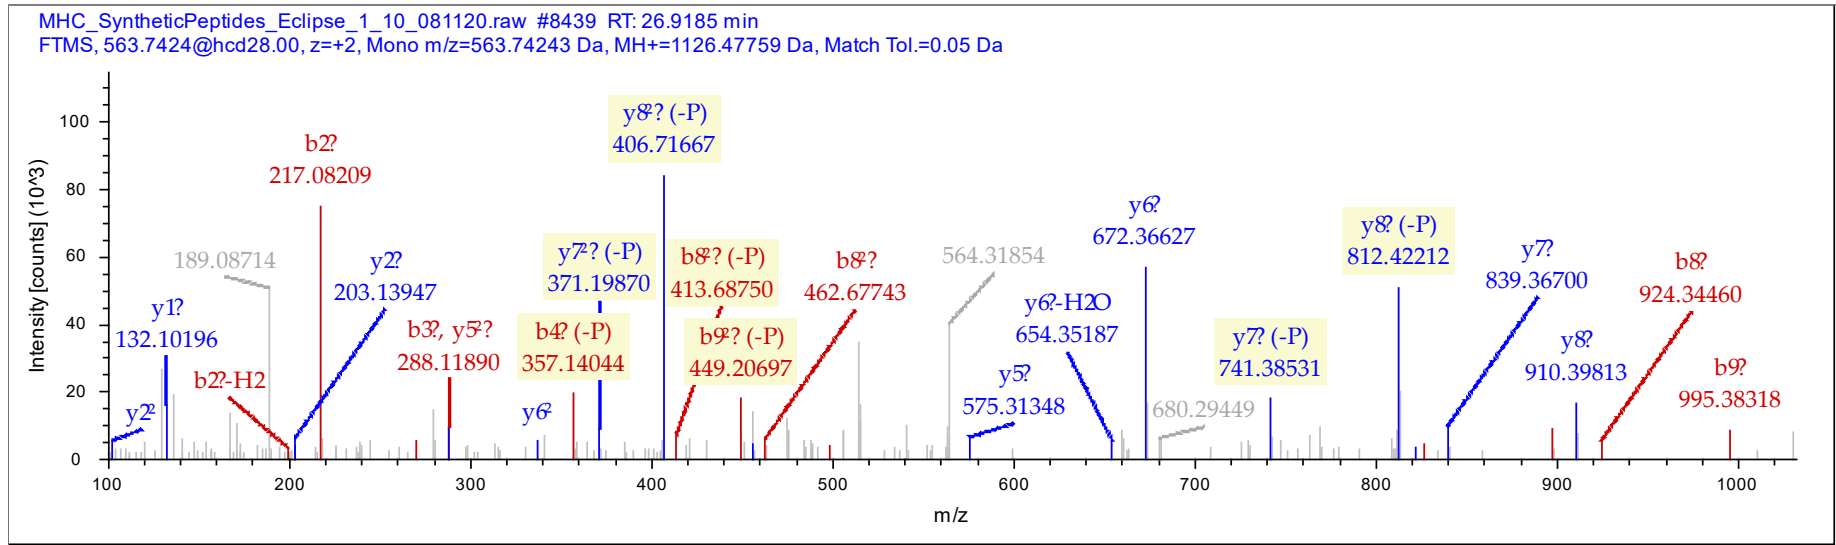

Experimental

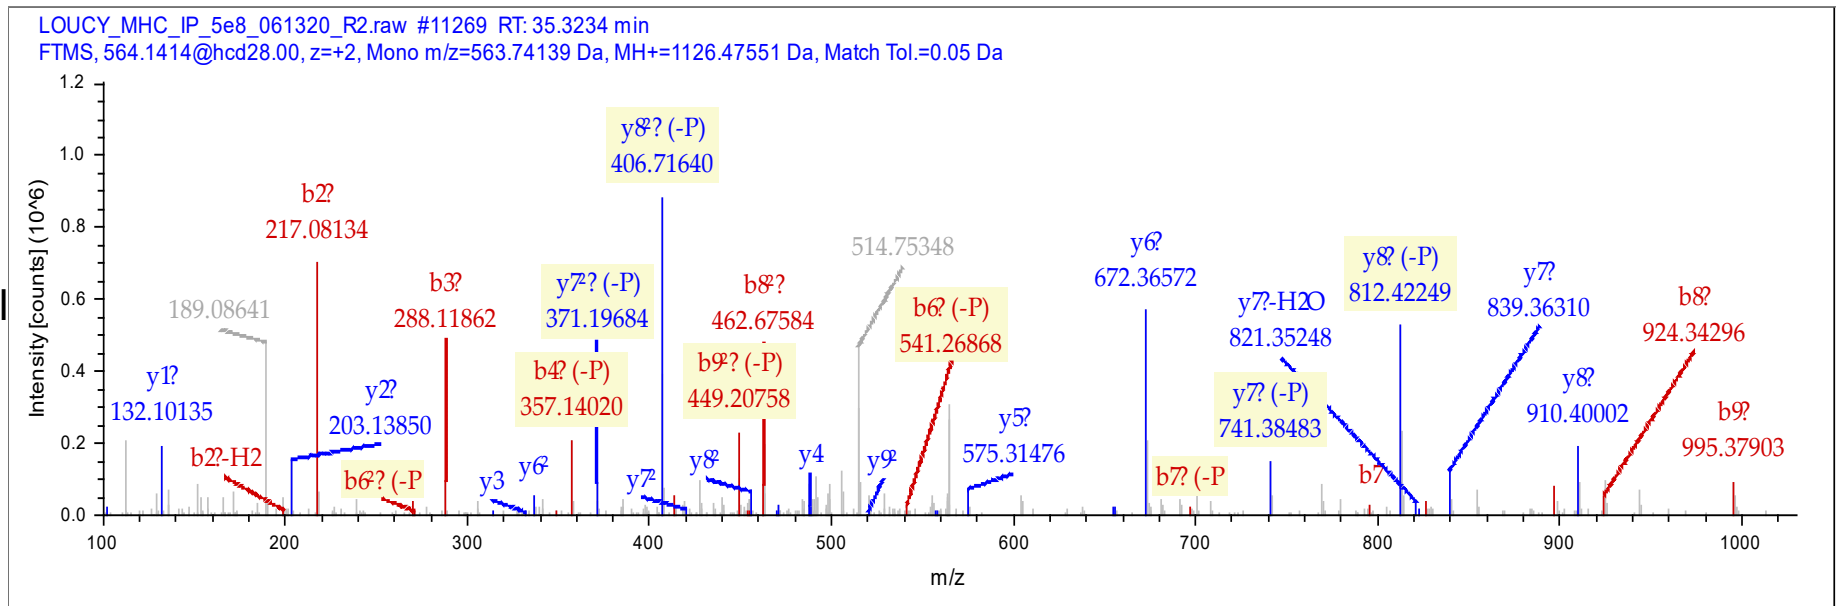

# SEGLSHF – Phospho

Synthetic

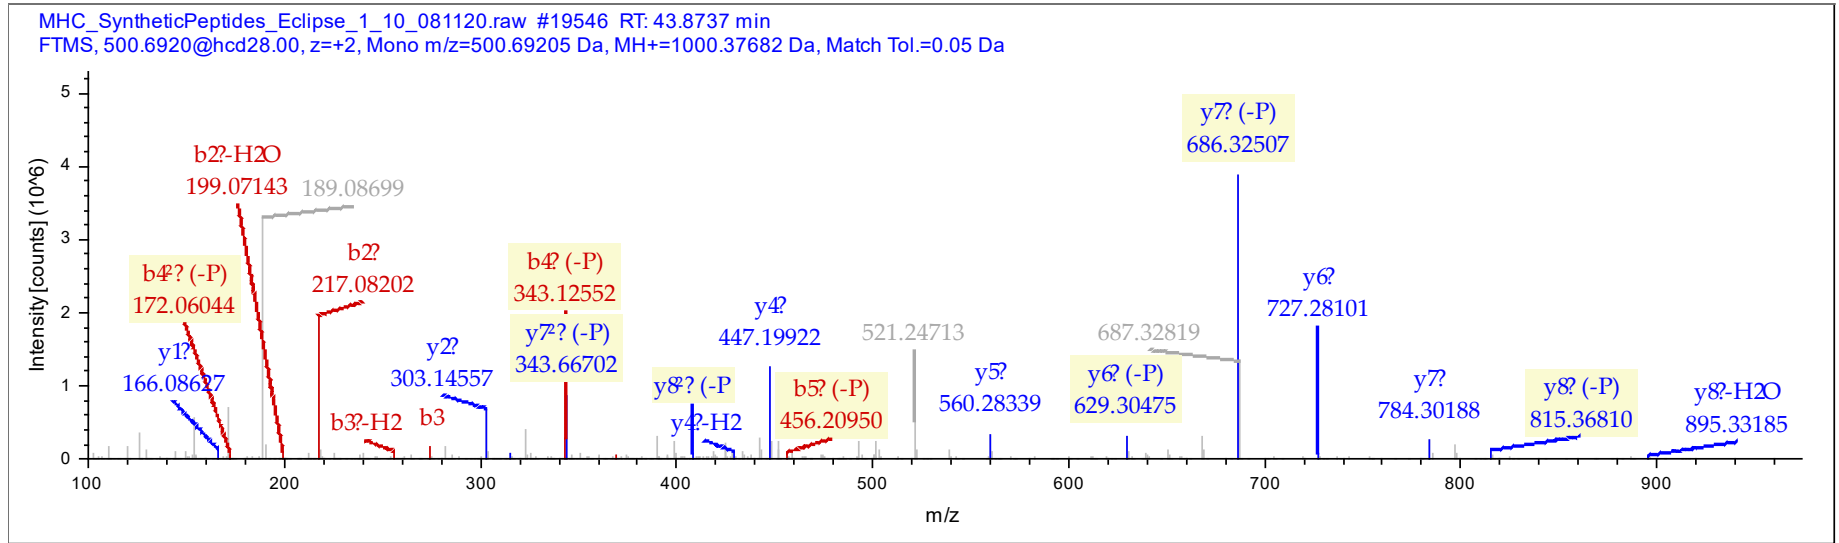

Experimental

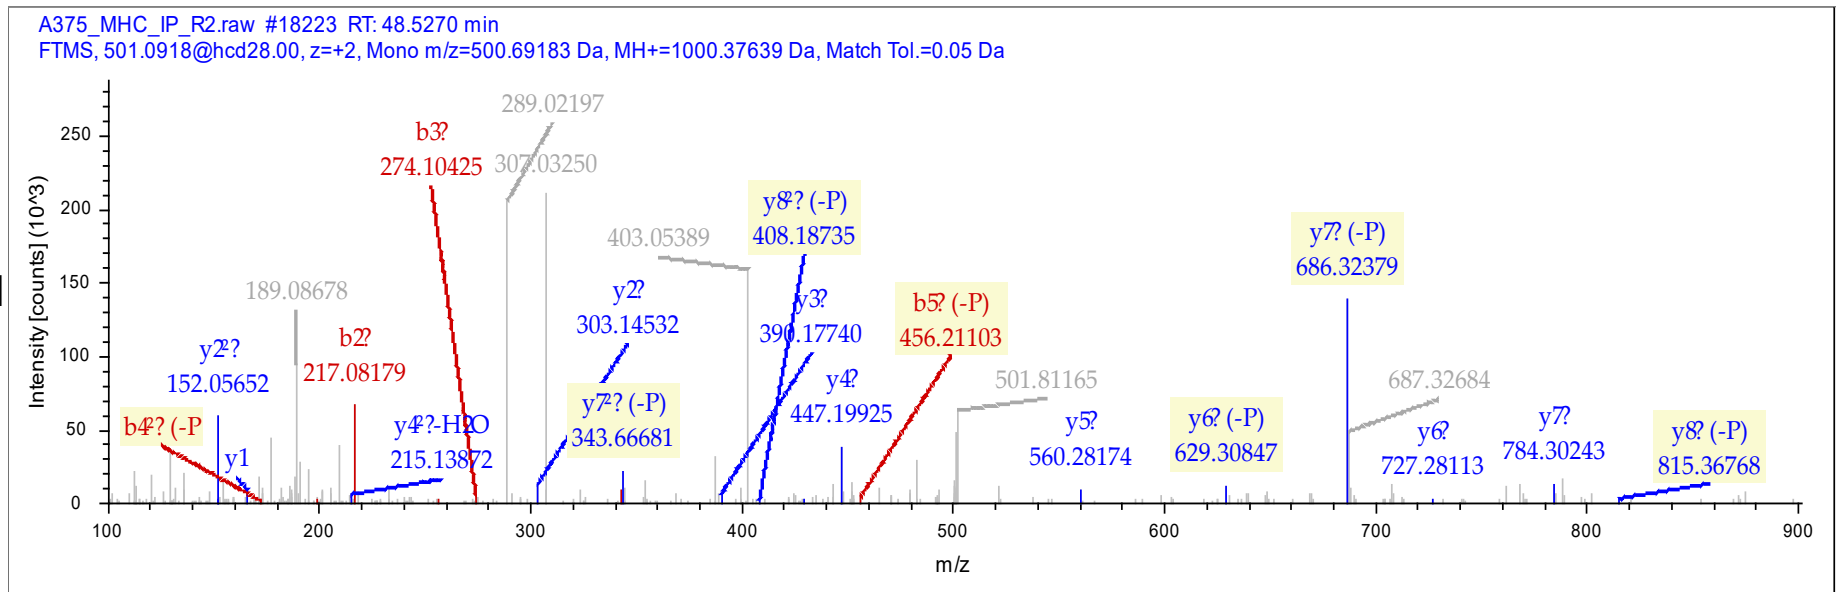

# SFFSRQLSL – Phospho

Synthetic

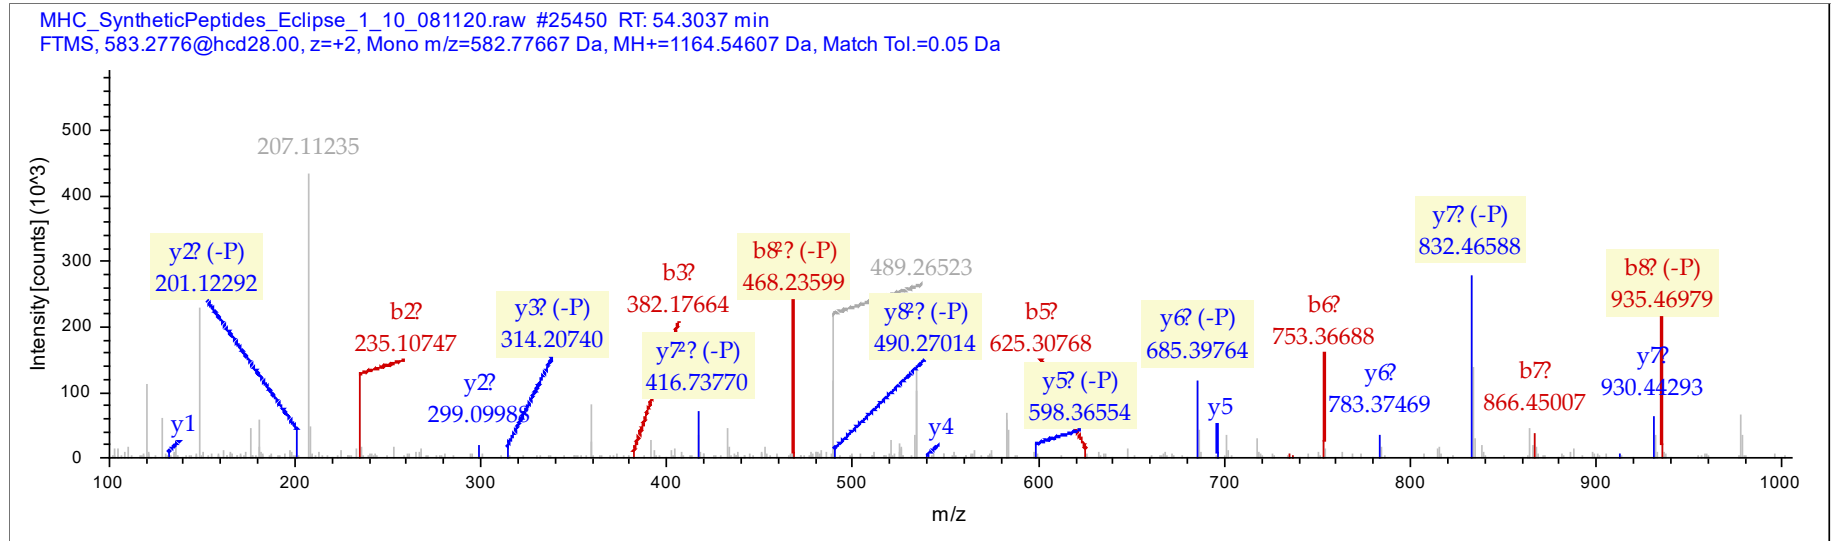

Experimental

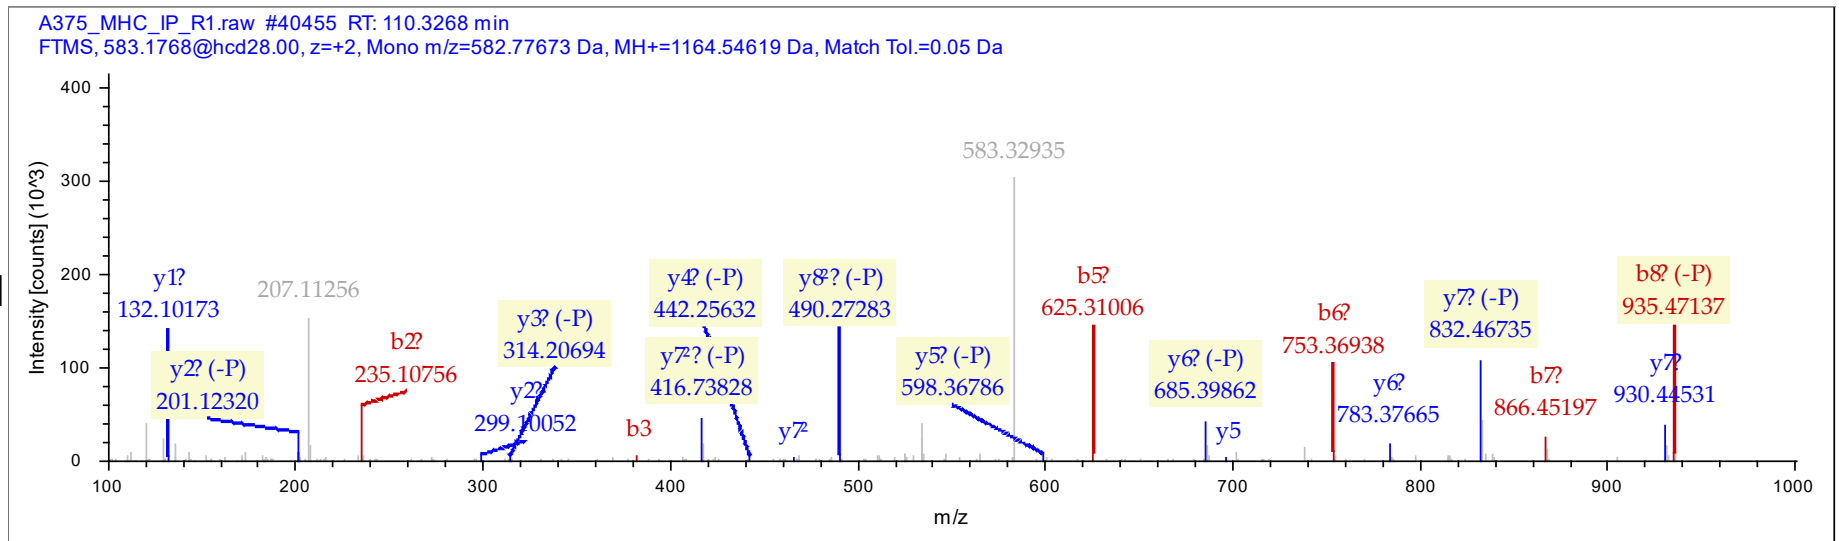



# VLASPLKTGR – Phospho

Synthetic

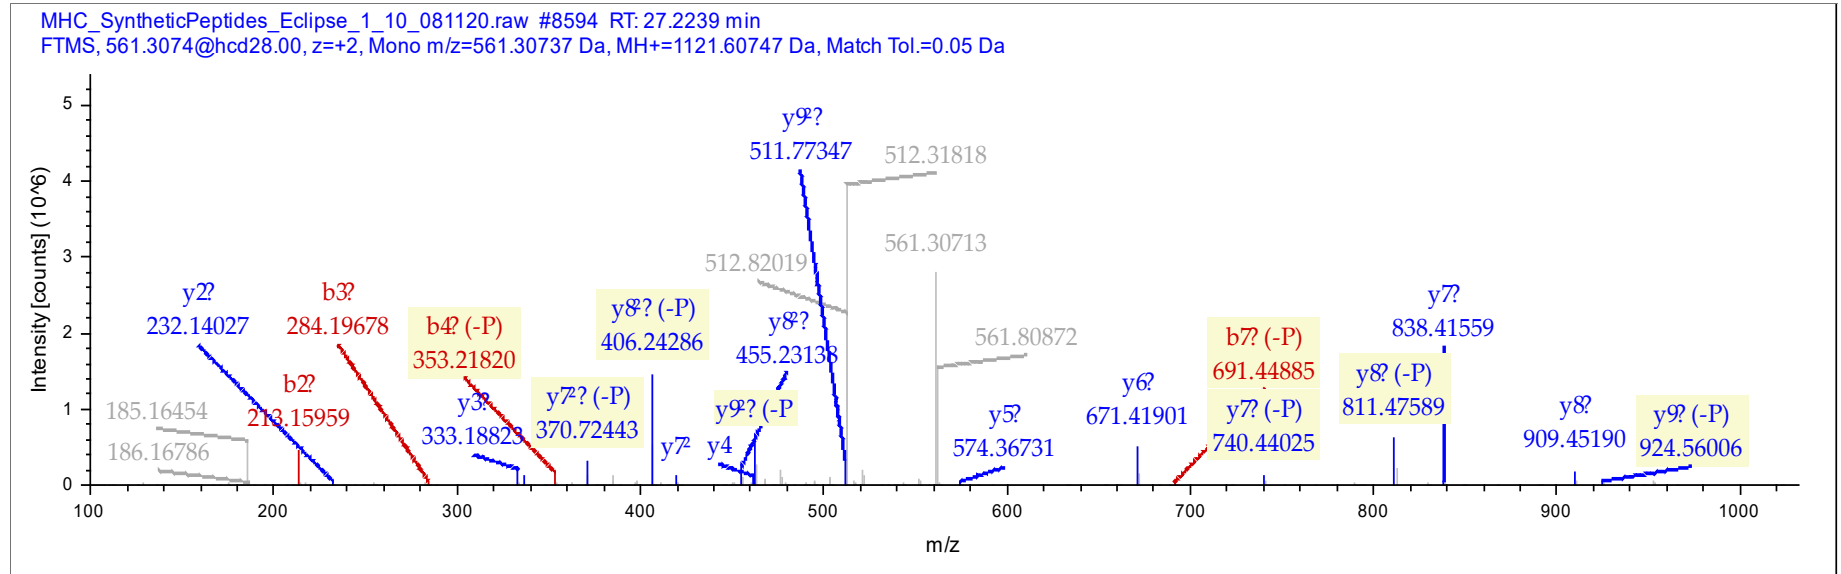

Experimental

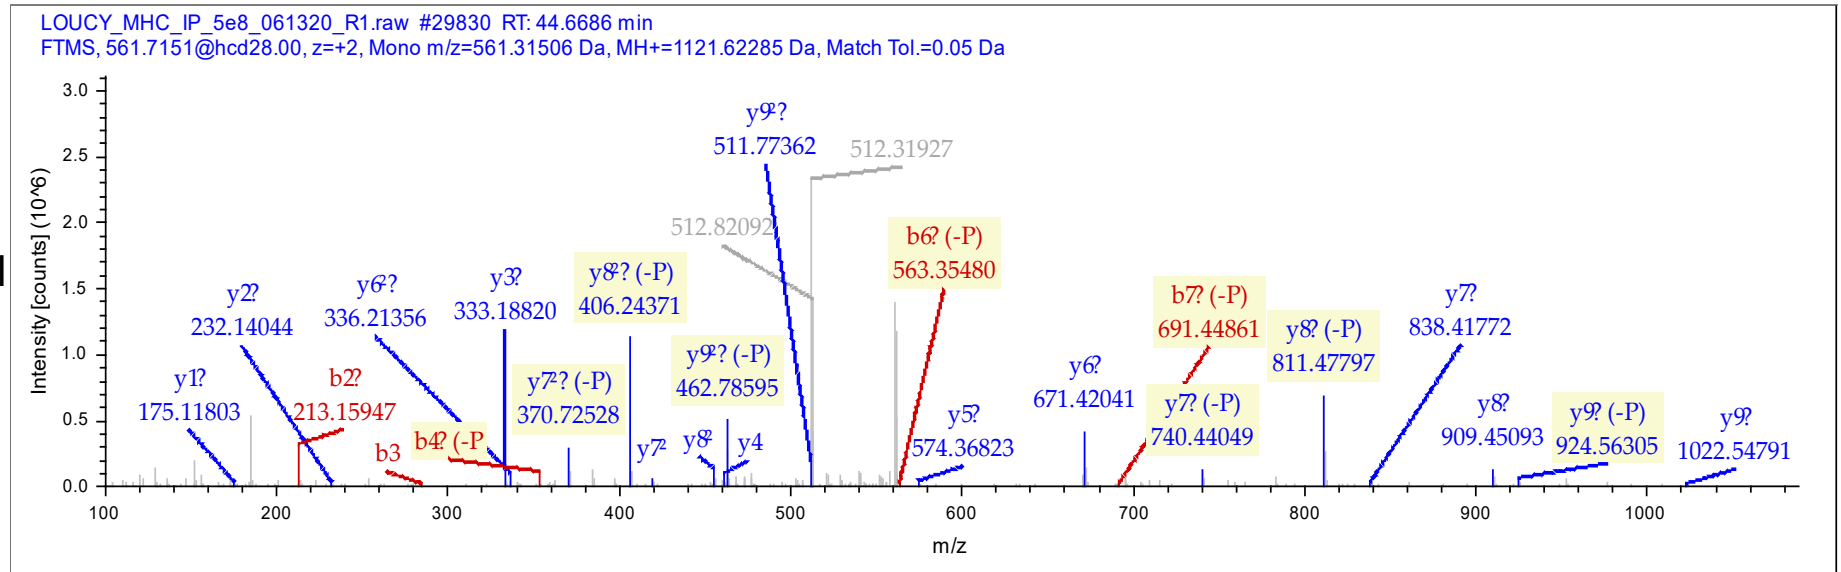



# ATAGPRLGW – Phosphorylation

Synthetic

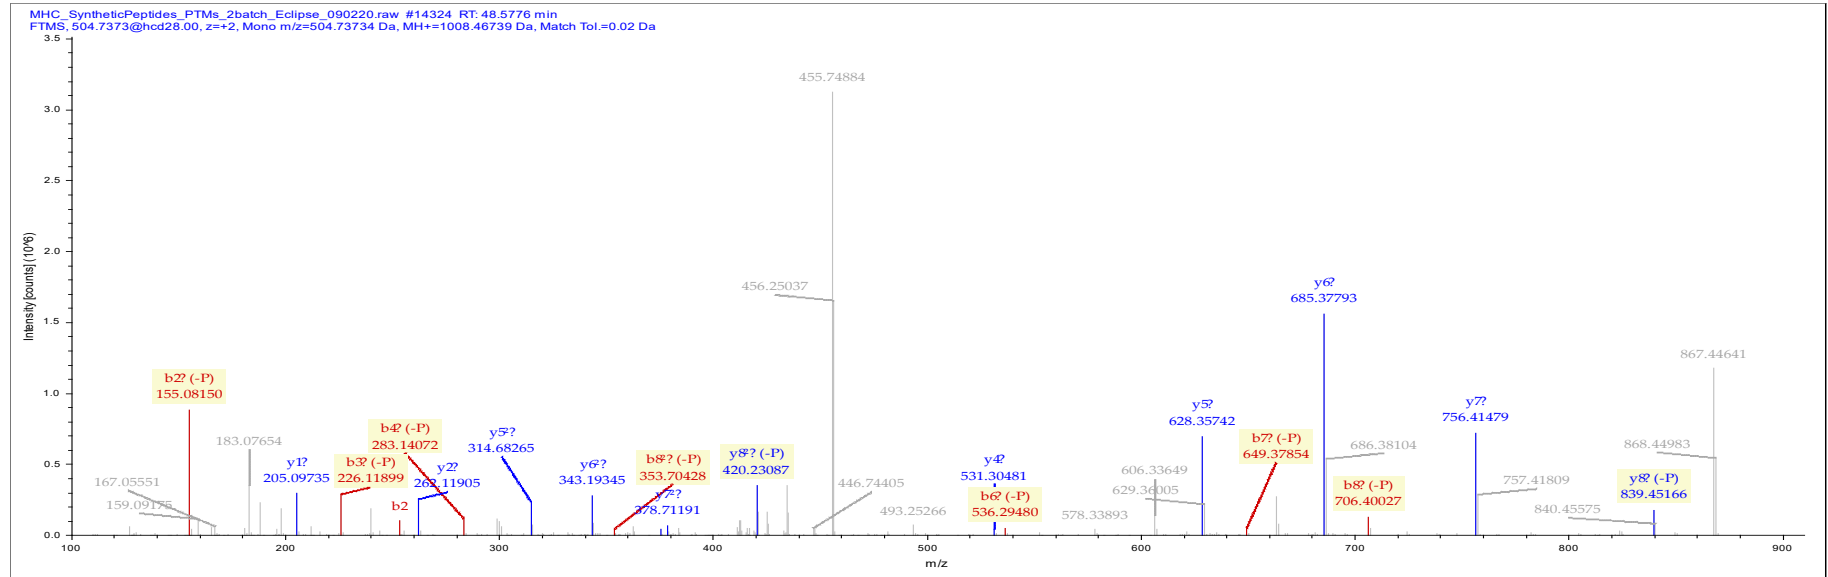

Experimental

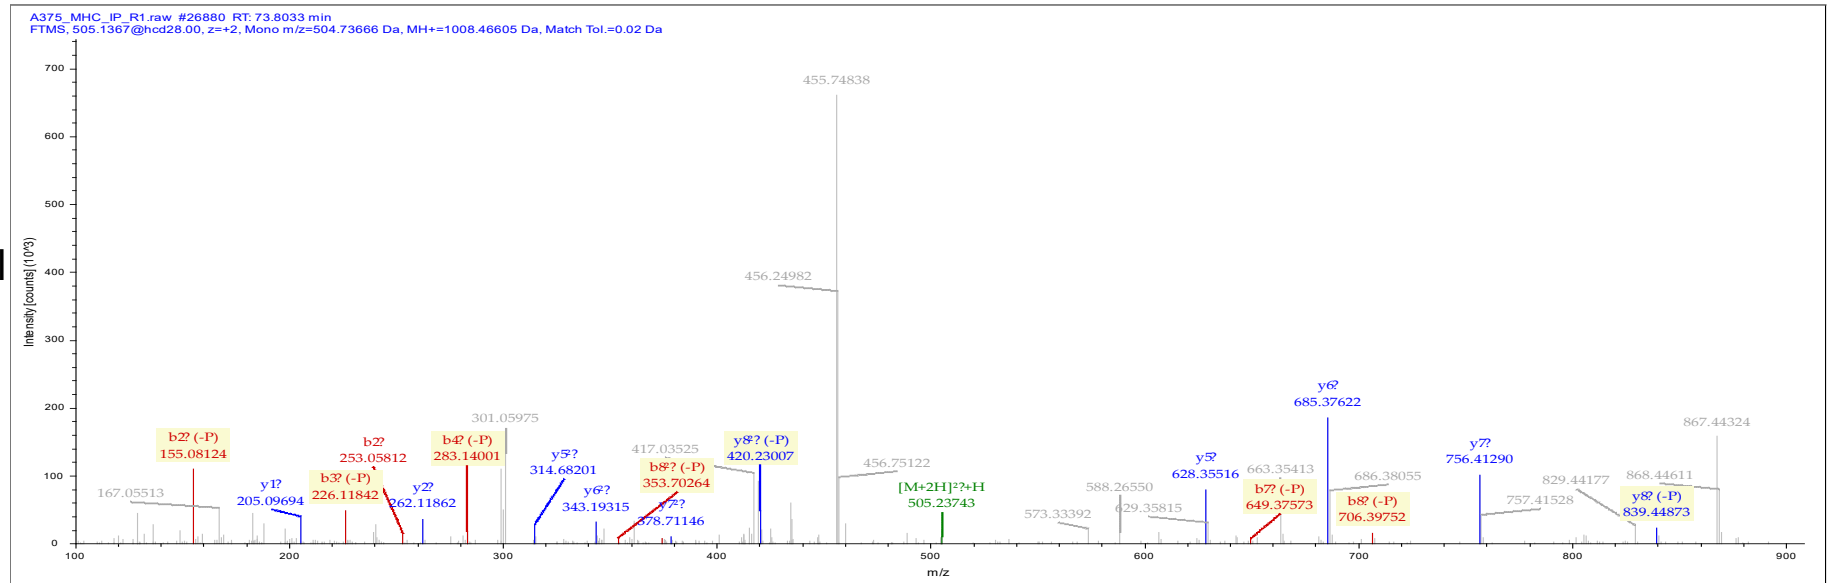

# RSASPSSQGW – Phosphorylation

Synthetic

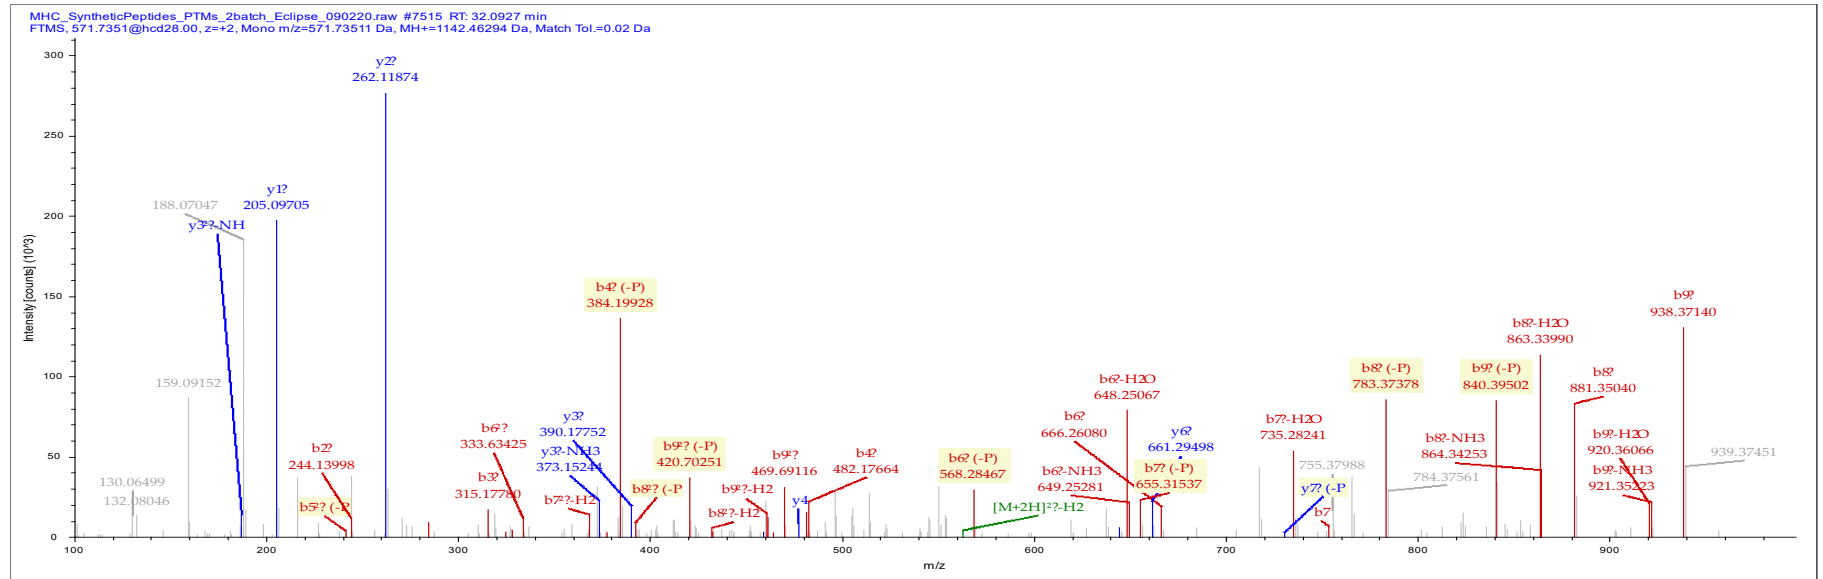

Experimental

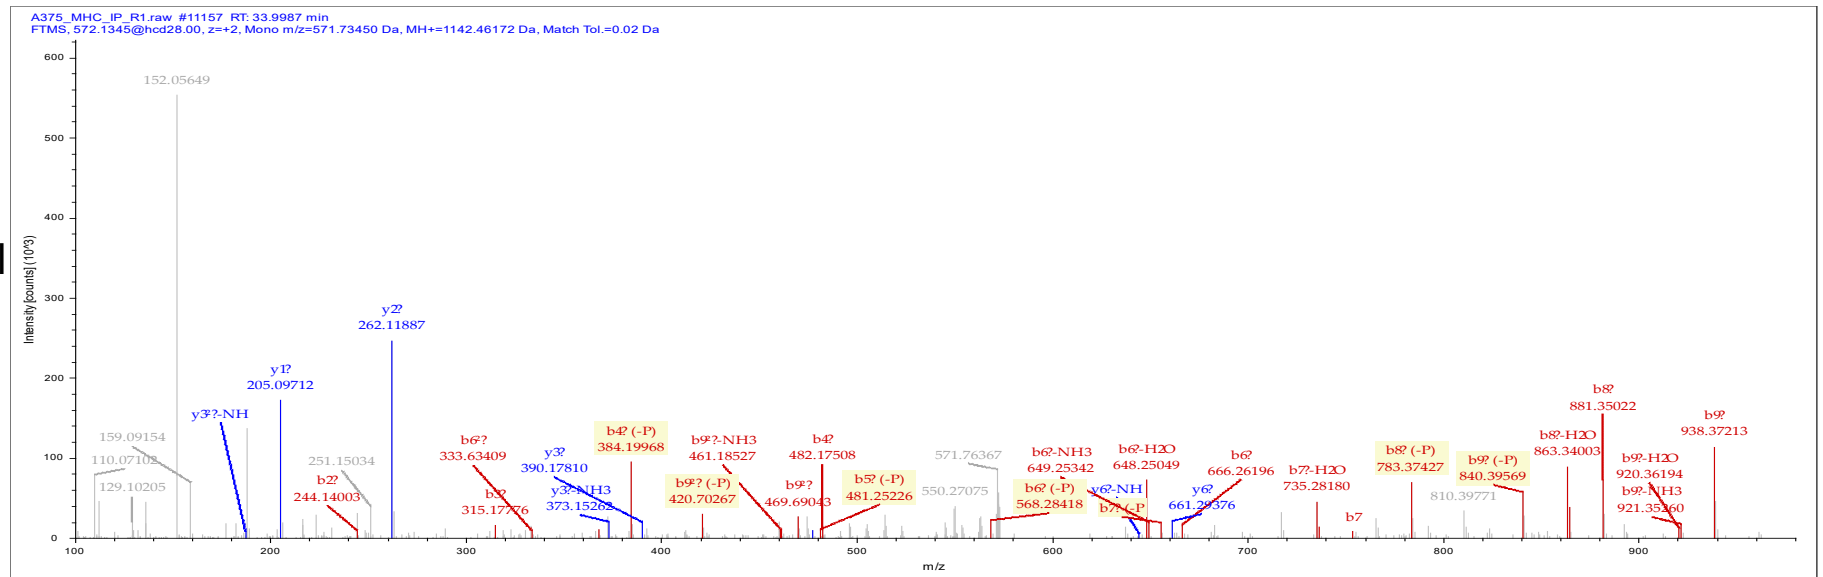

# RVASPTSGV – Phosphorylation

Synthetic

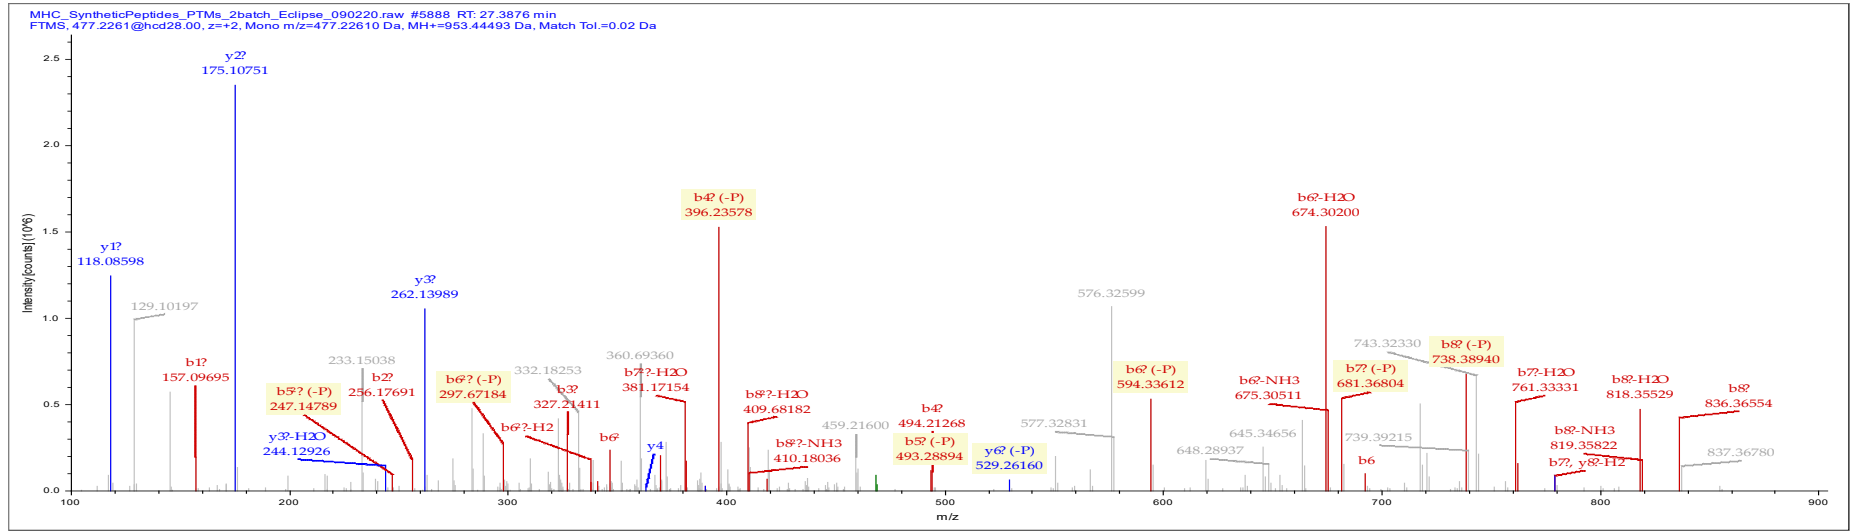

Experimental

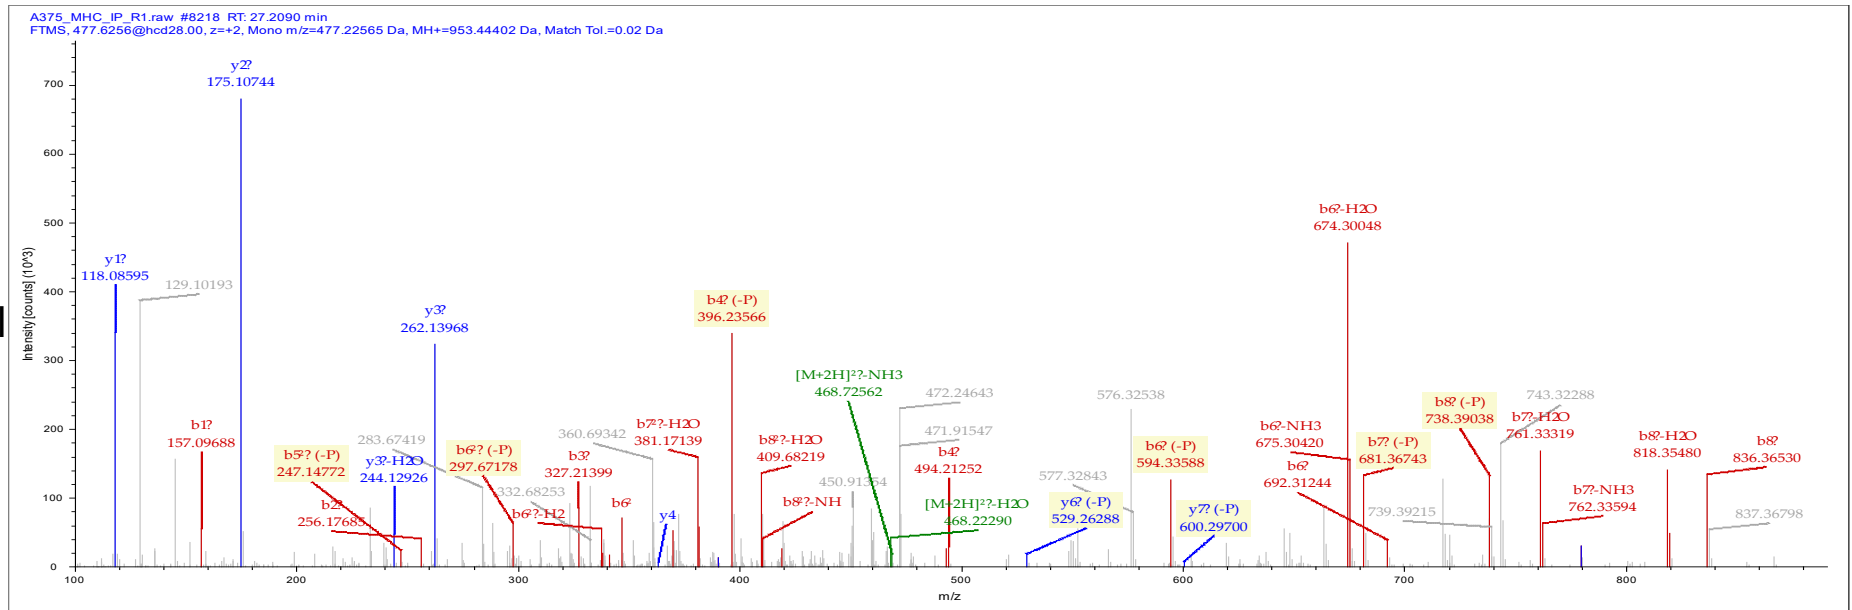

# SSDPASQLSY – Phosphorylation

Synthetic

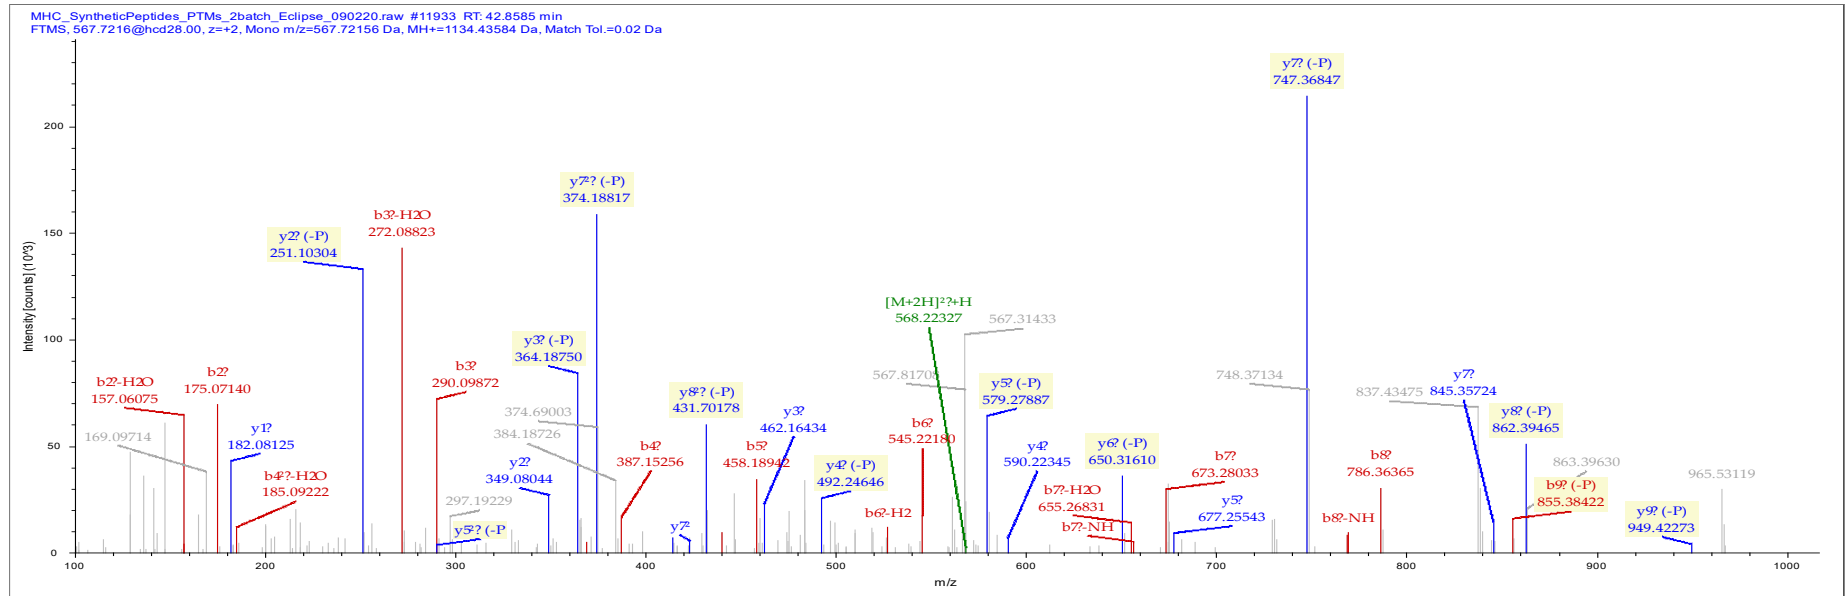

Experimental

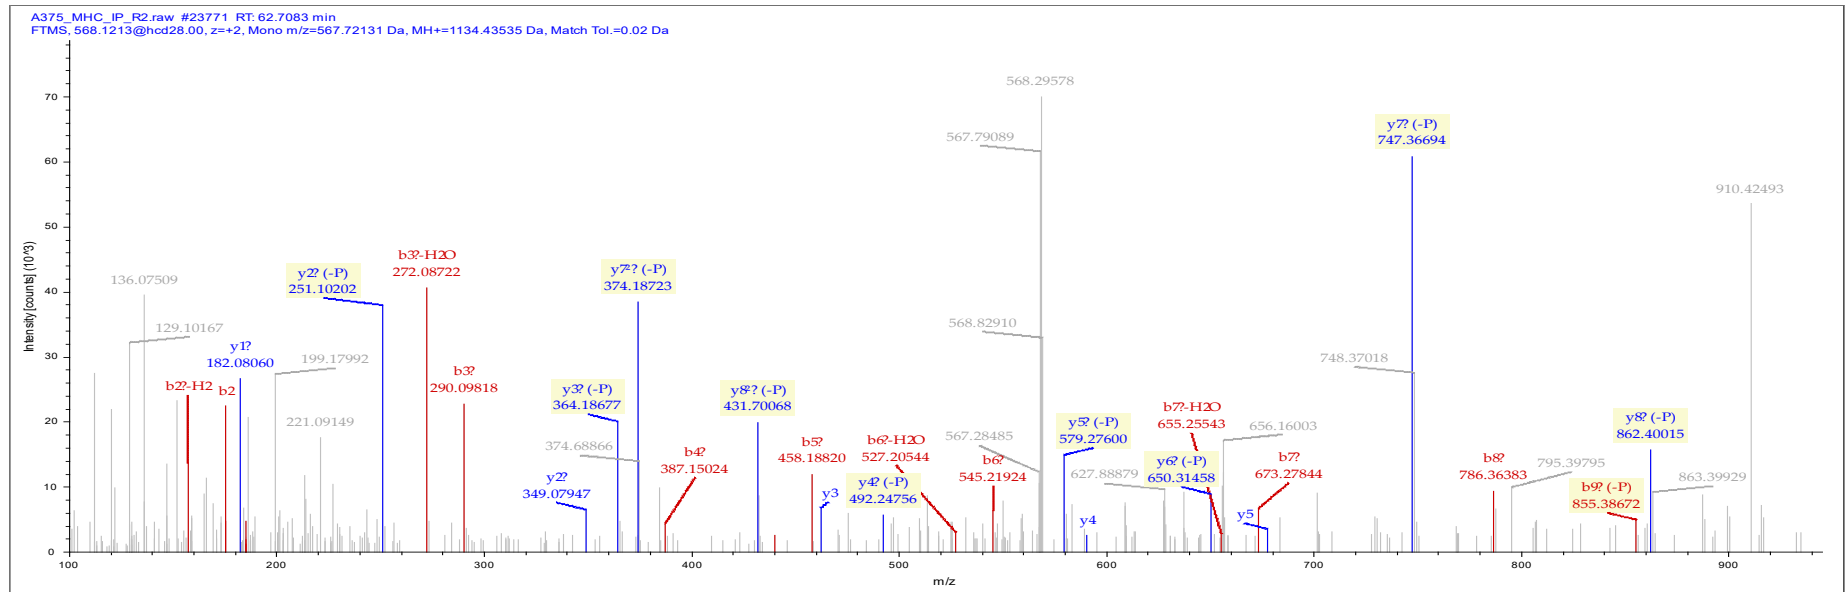

# Spliced peptide - AAAAGARLY

Synthetic

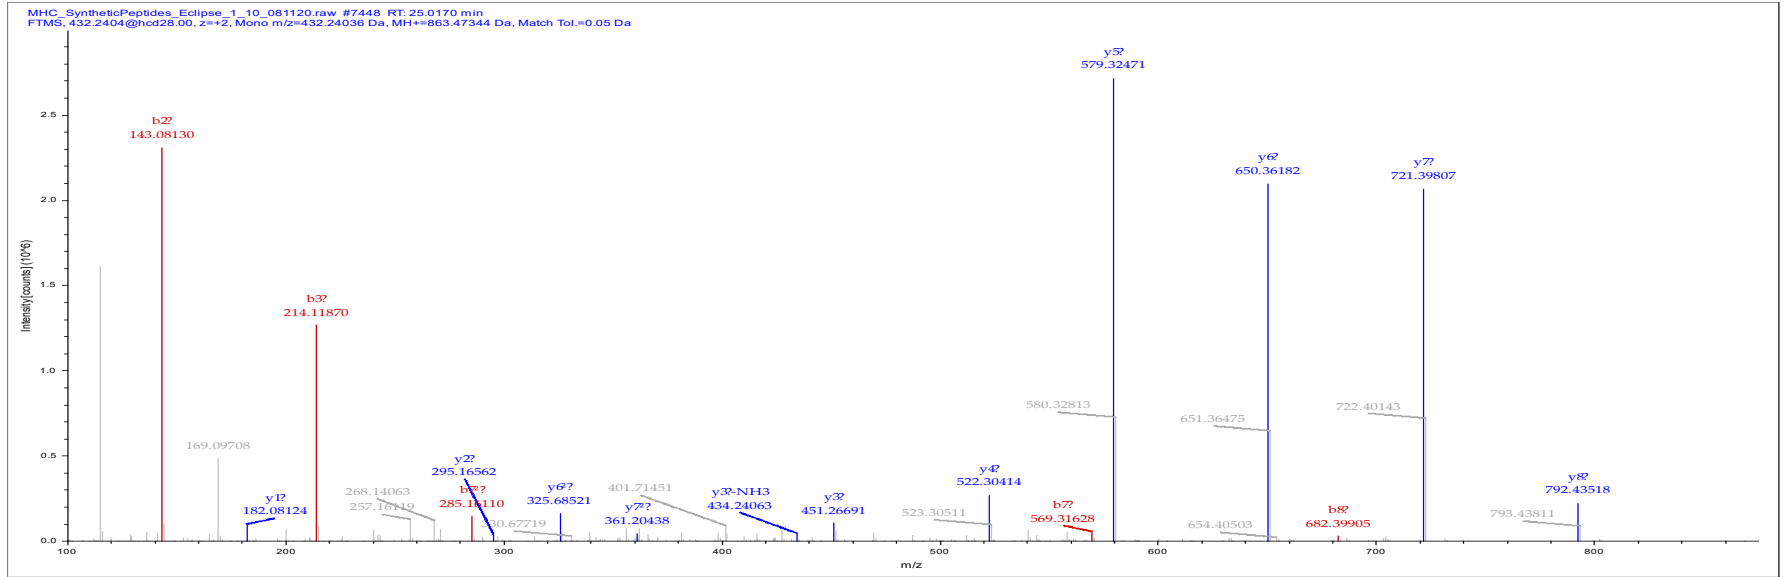

Experimental

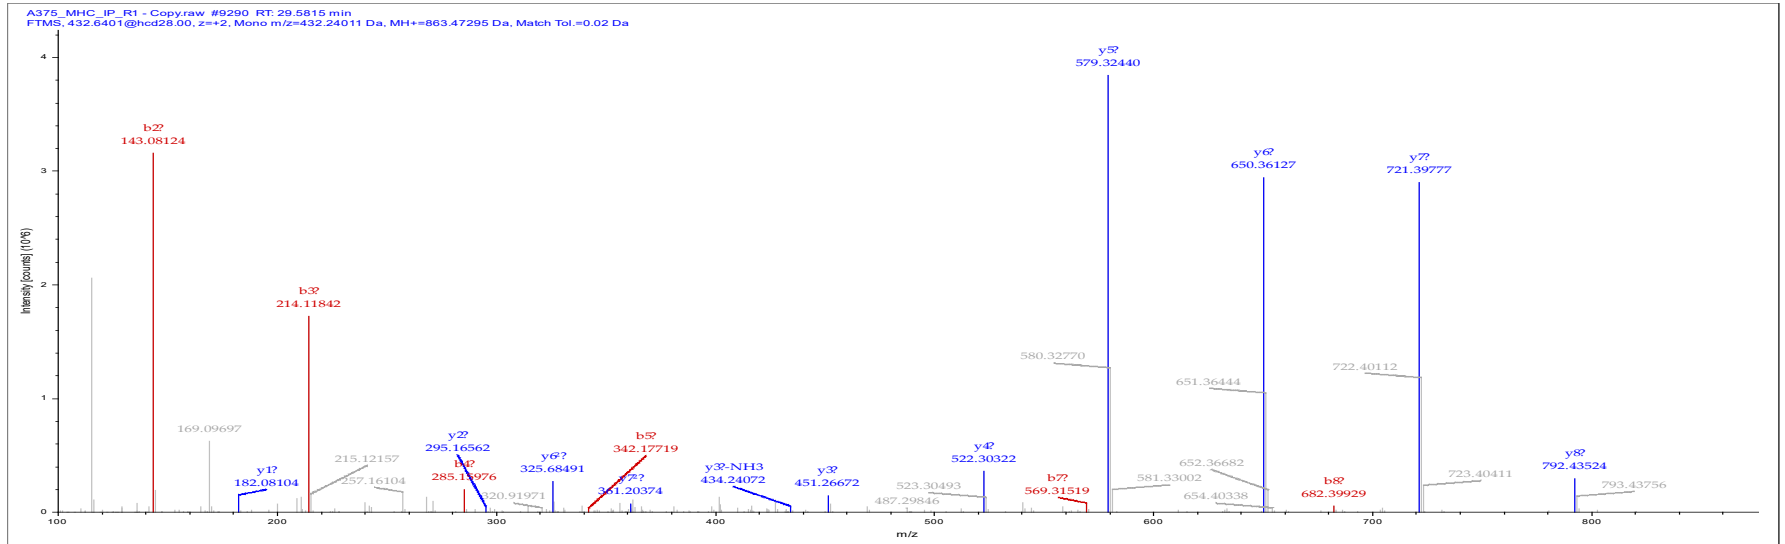

# Spliced peptide - AAALKAAF

Synthetic

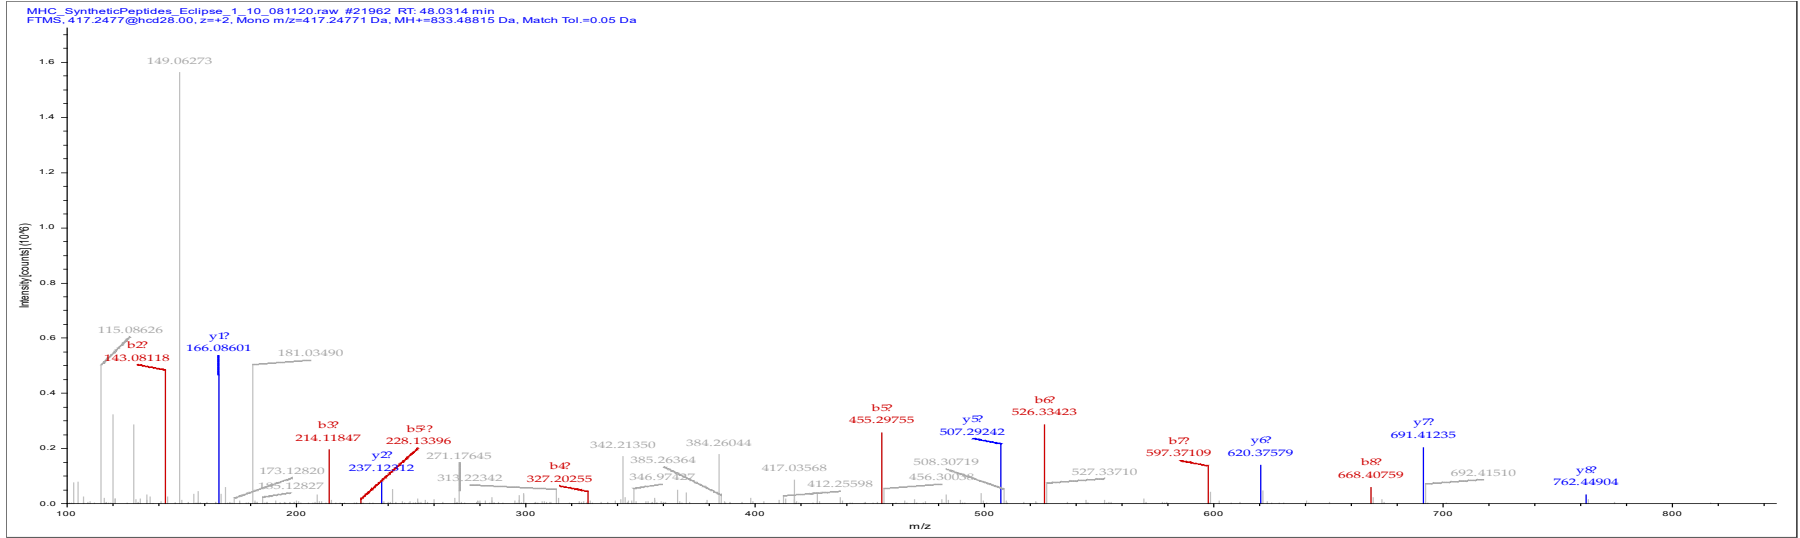

Experimental

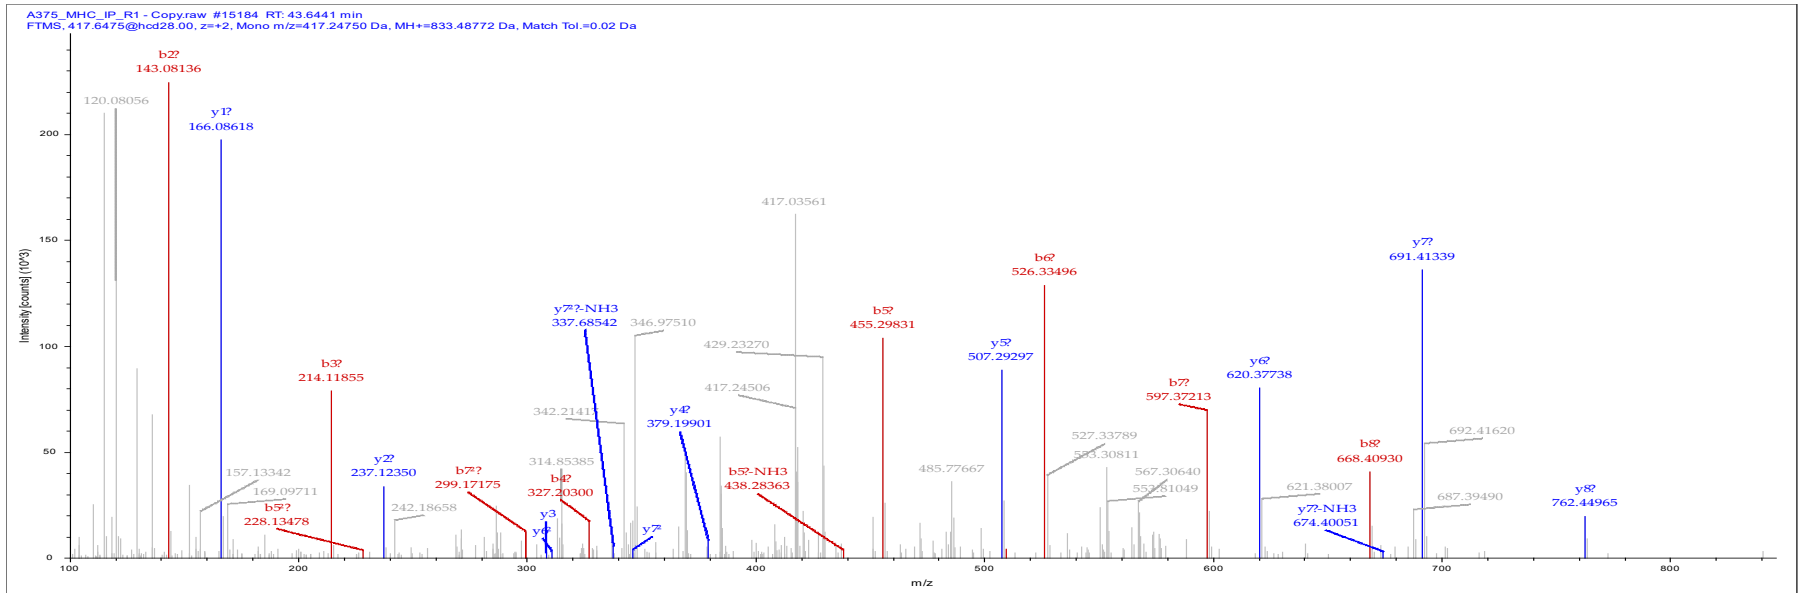

# Spliced peptide - ASDLLLHSY

Synthetic

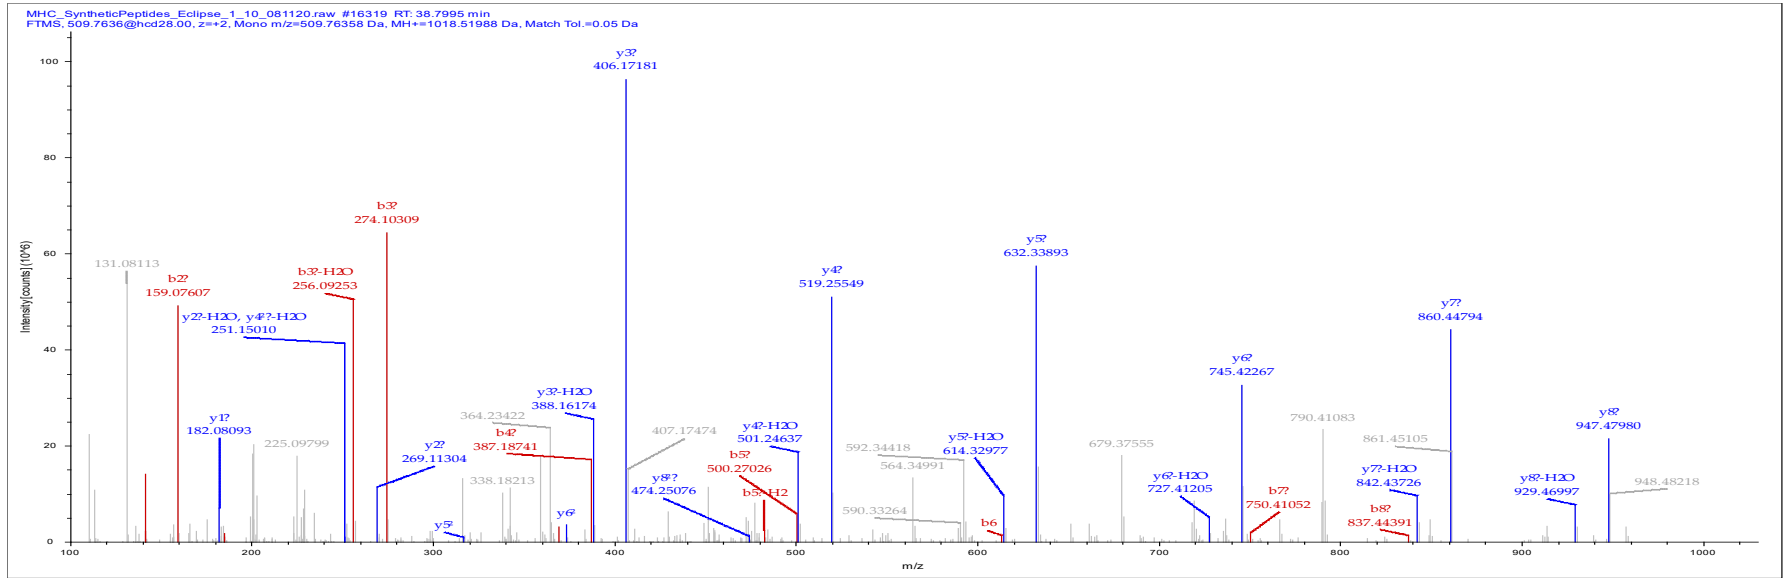

Experimental

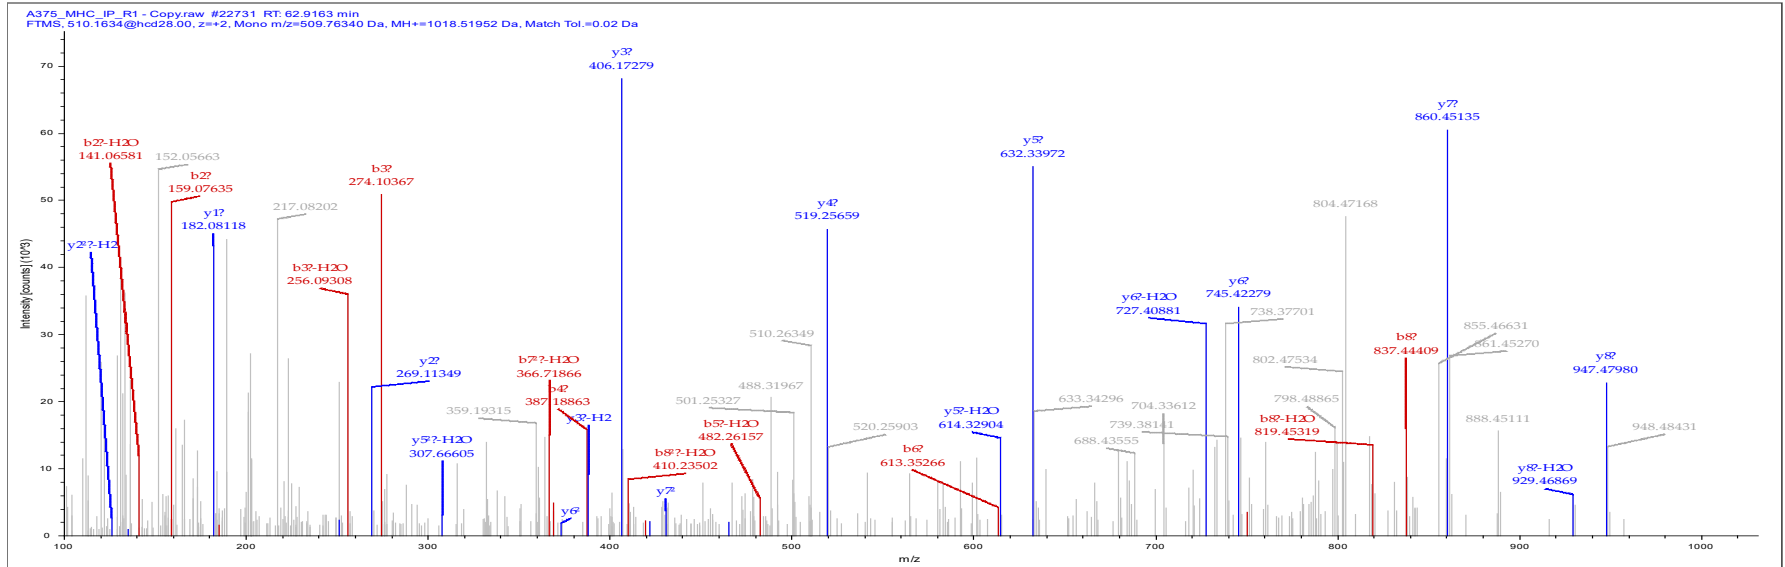

# Spliced peptide - ASELHTSLY

Synthetic

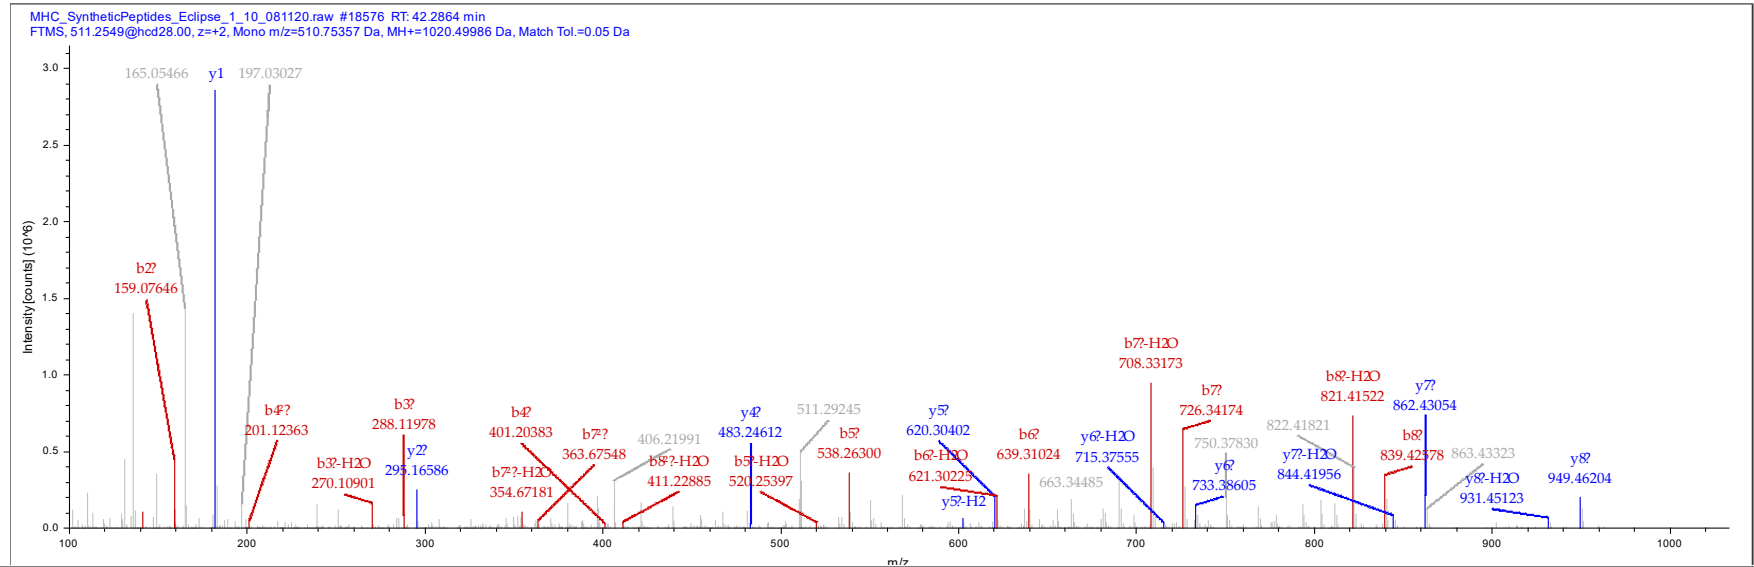

Experimental

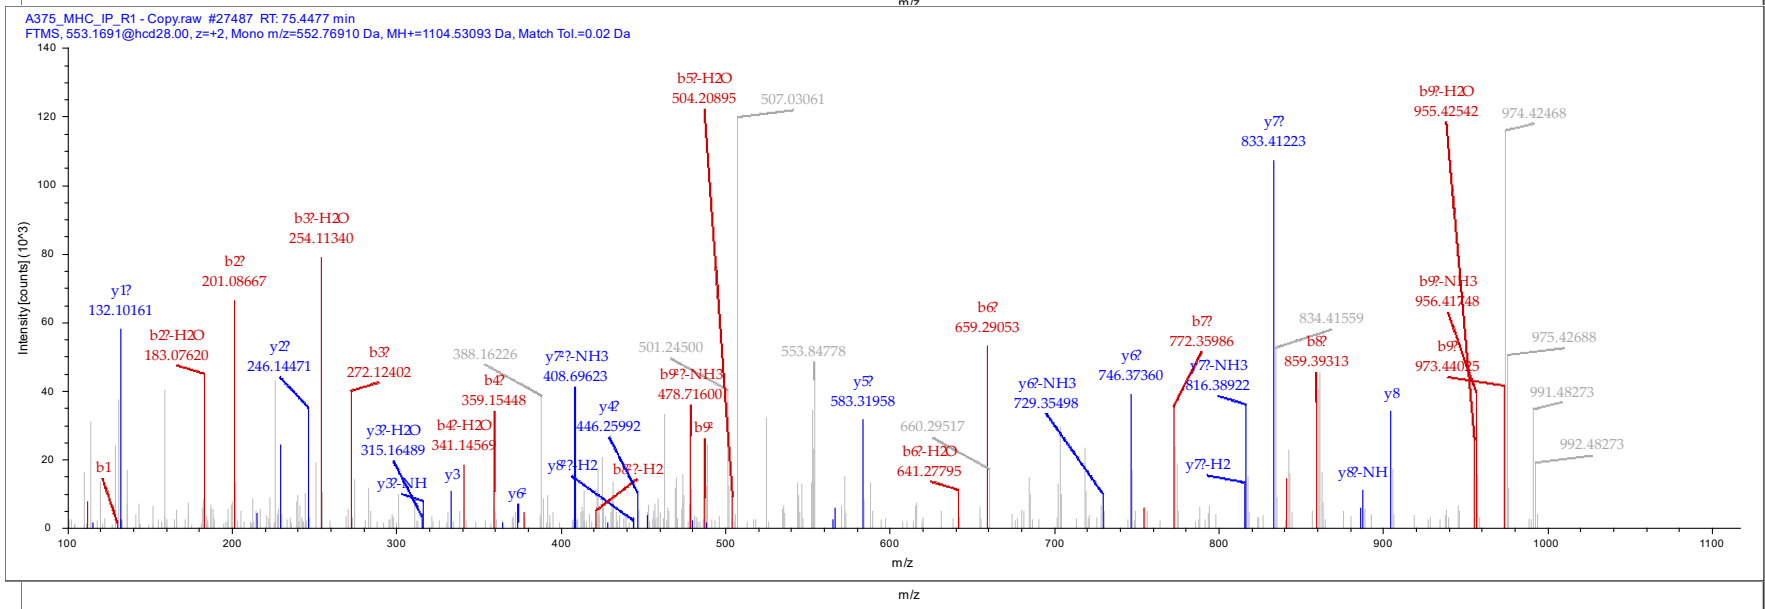



# Spliced peptide - EAASYHLSNL

Synthetic

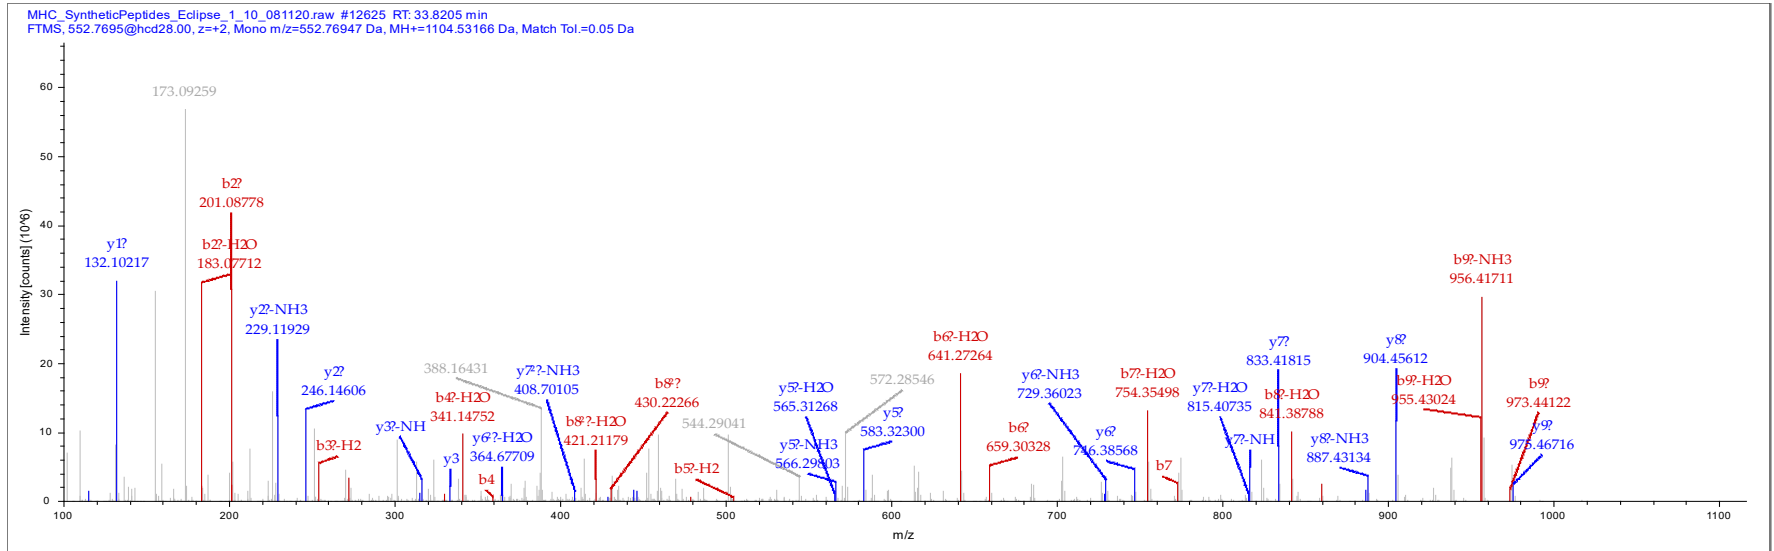

Experimental

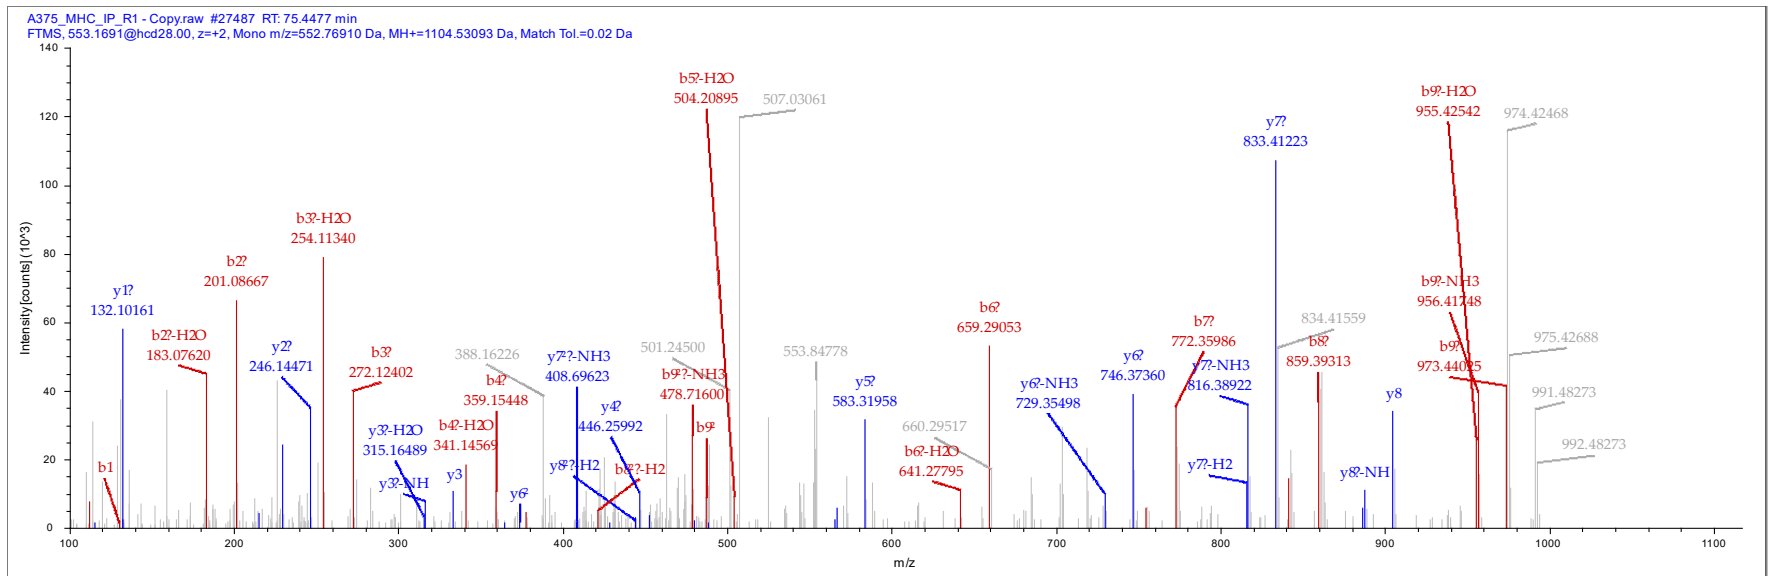

# Spliced peptide - EELAAKLKF

Synthetic

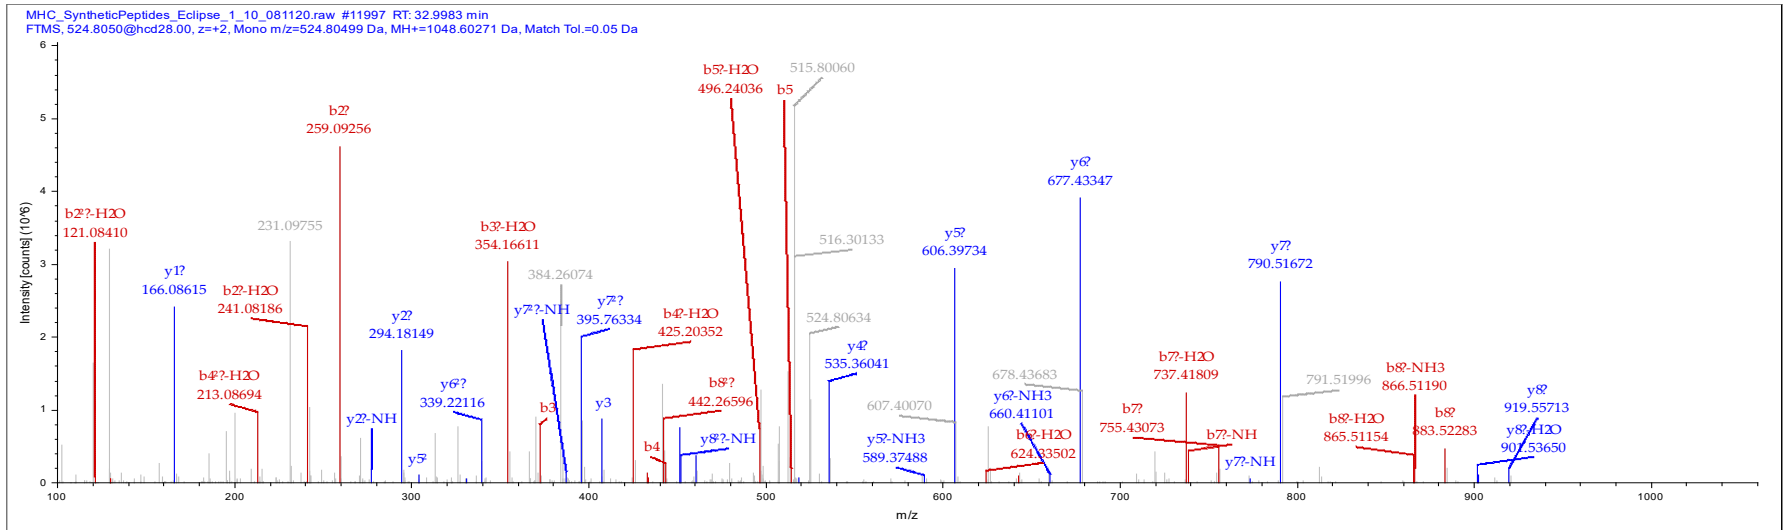

Experimental

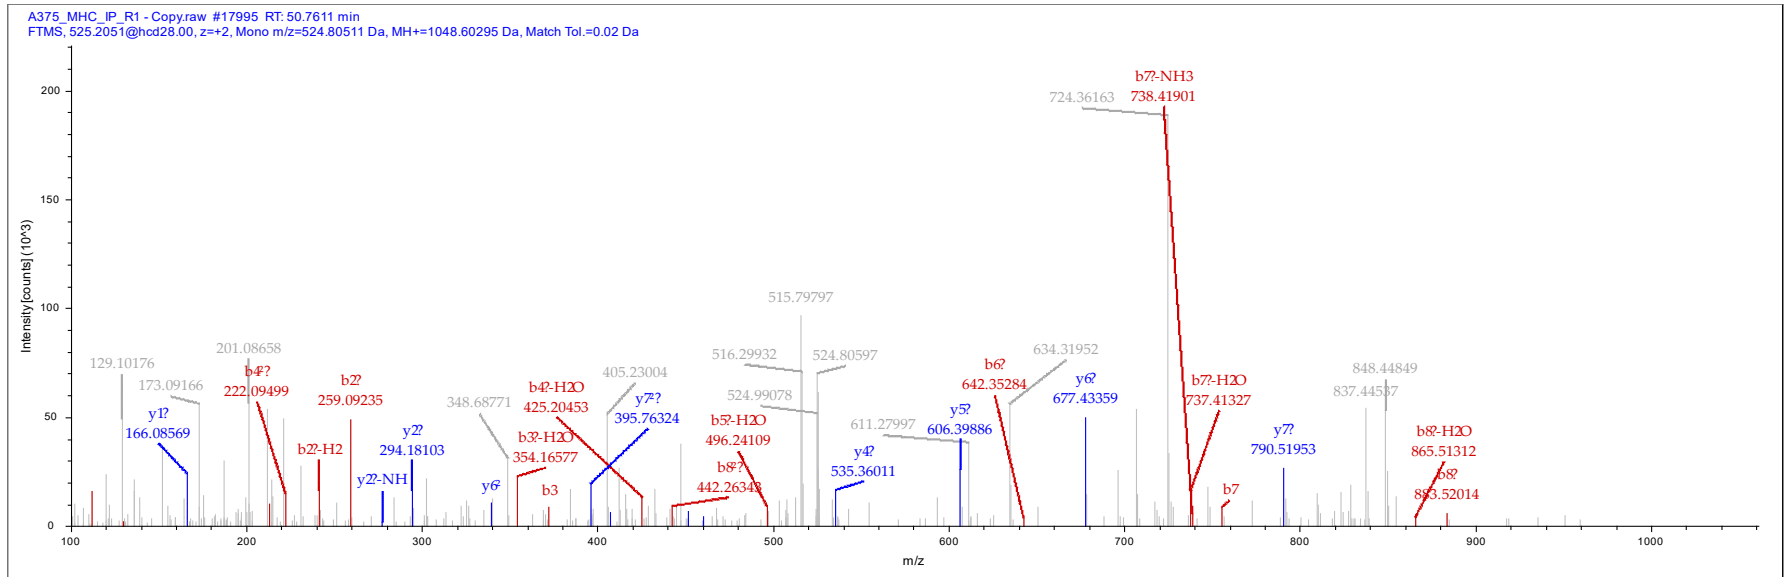

# Spliced peptide - EENLYFKNF

Synthetic

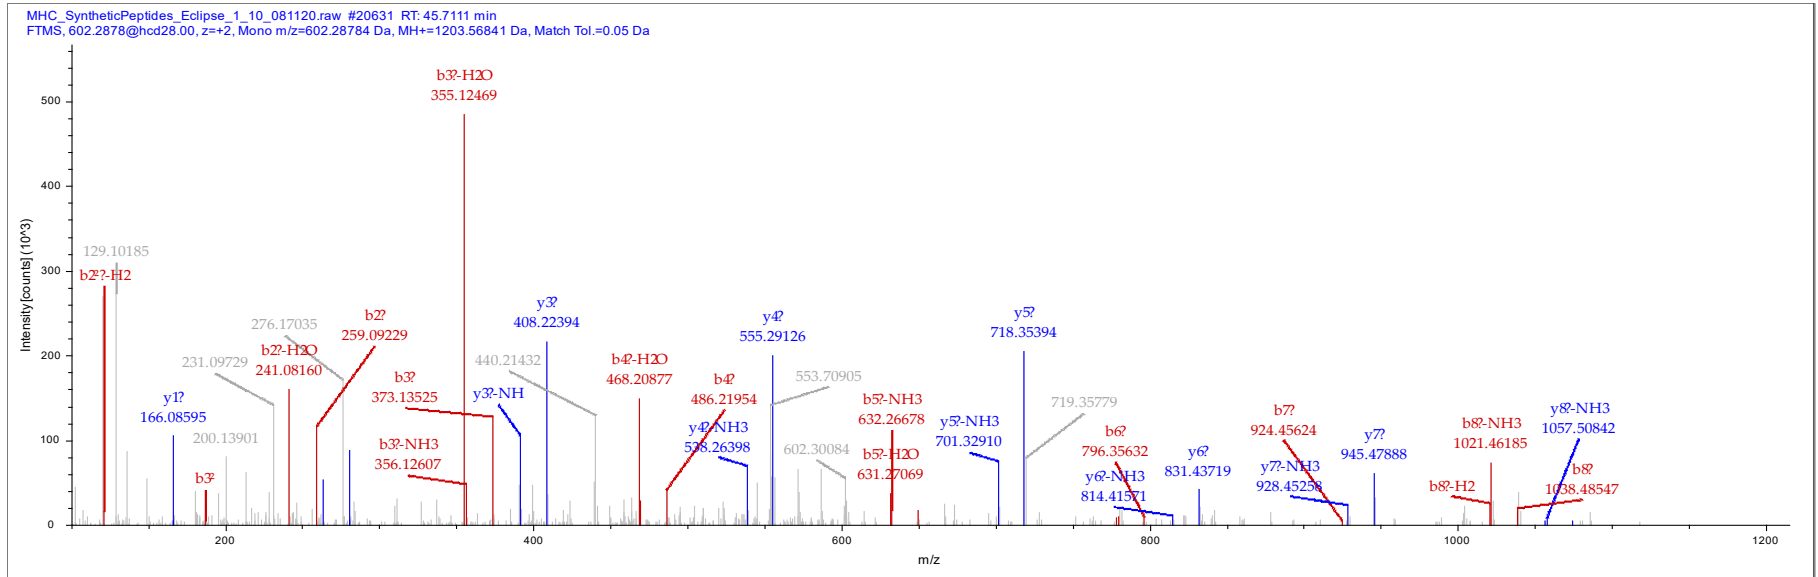

Experimental

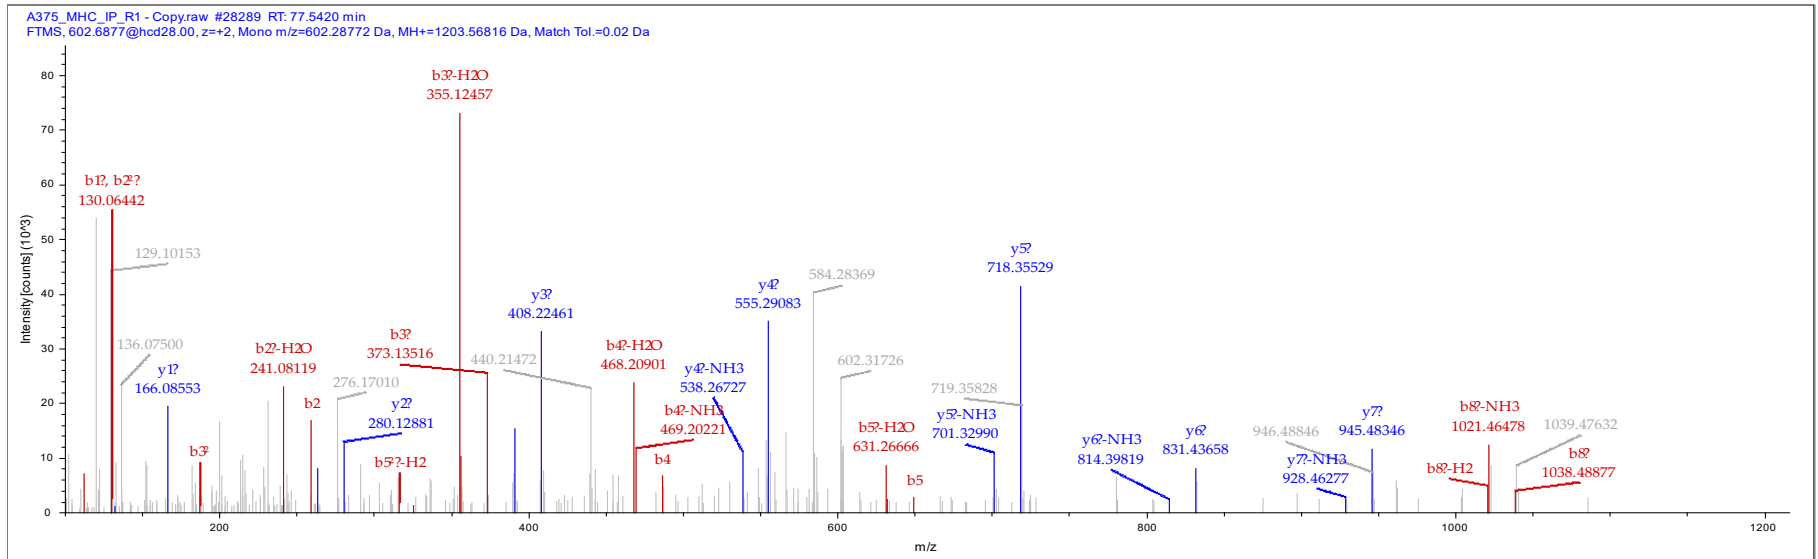

# Spliced peptide - ELEDGRTLSDY

Synthetic

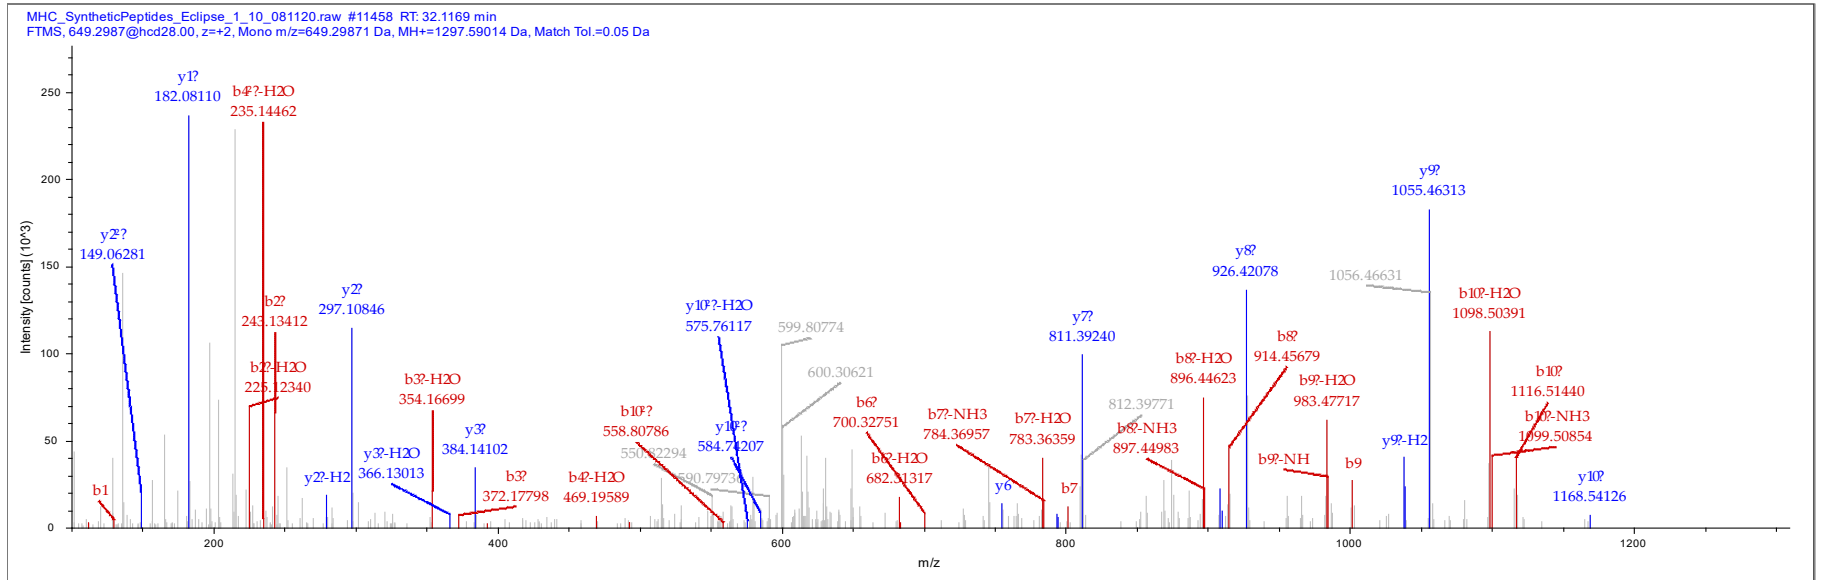

Experimental

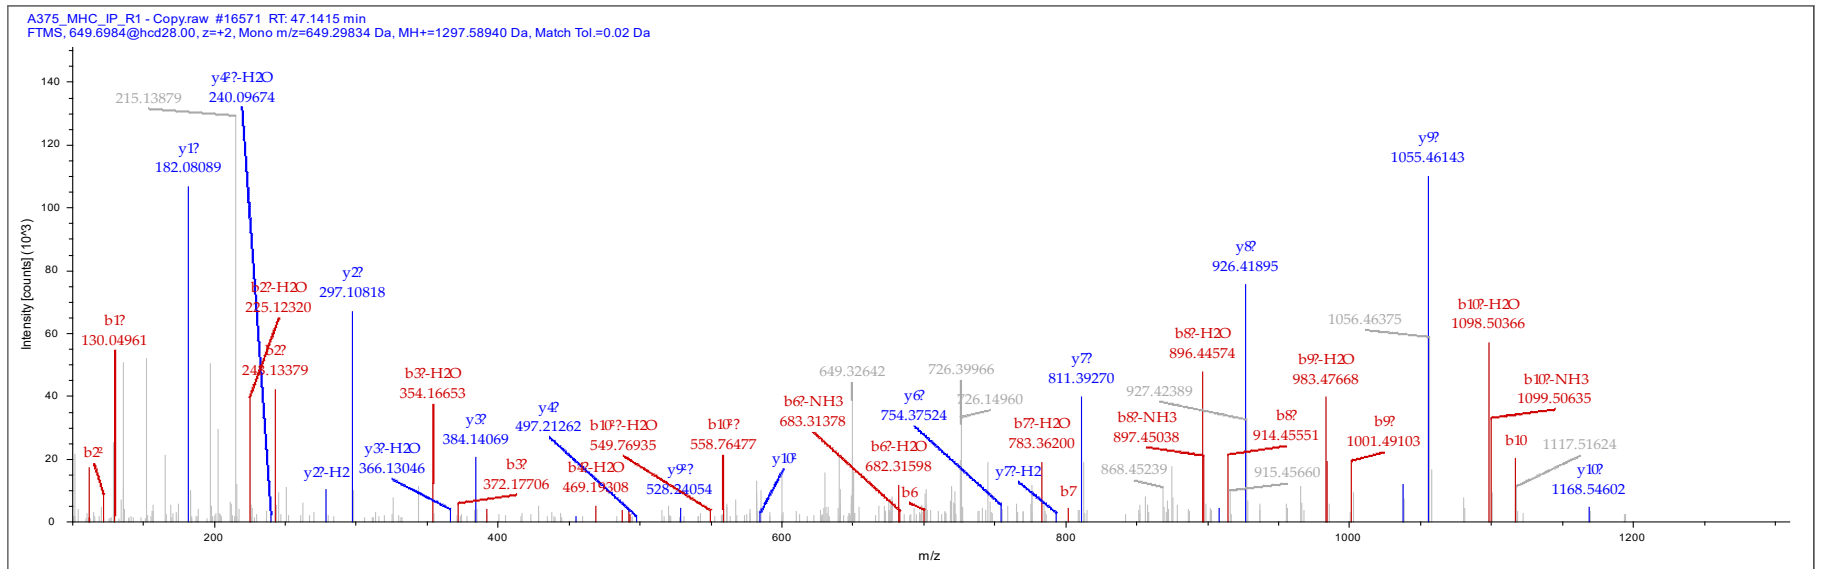

# Spliced peptide - FANYLDKVL

Synthetic

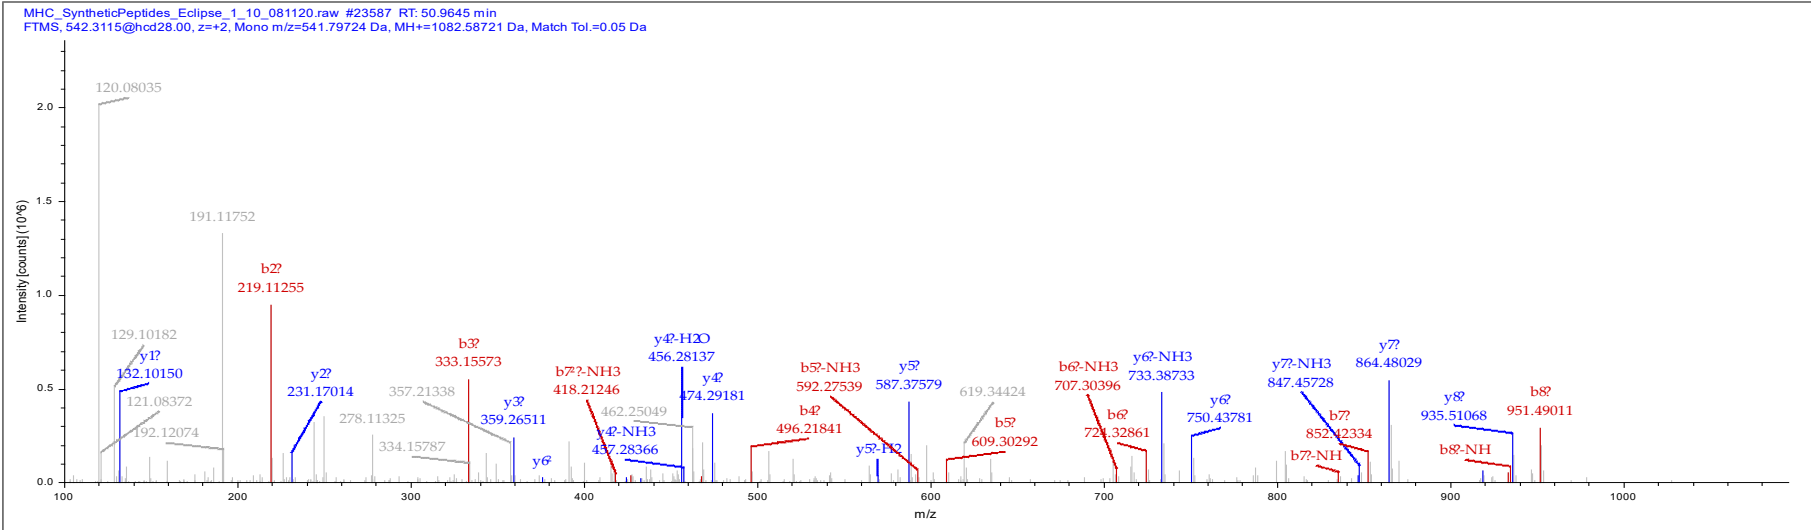

Experimental

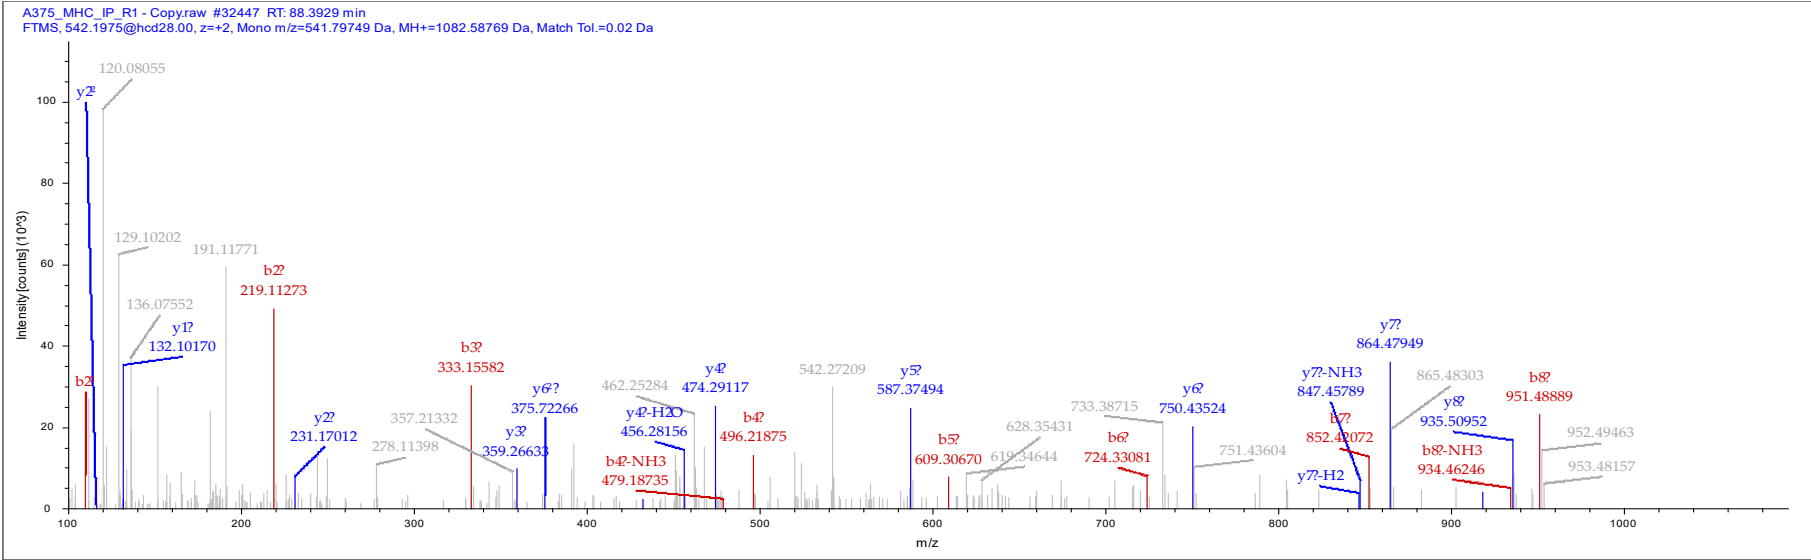

# Spliced peptide - FLFQDFLRQA

Synthetic

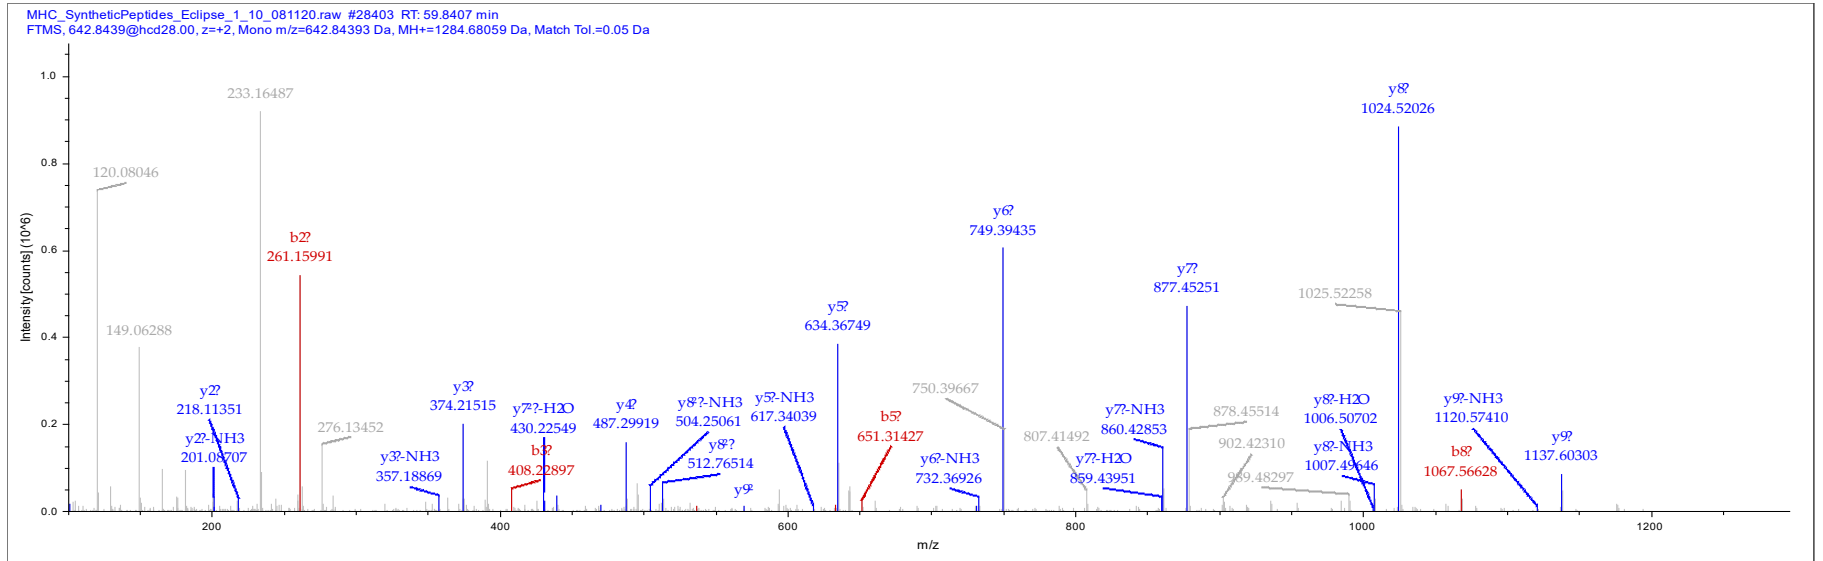

Experimental

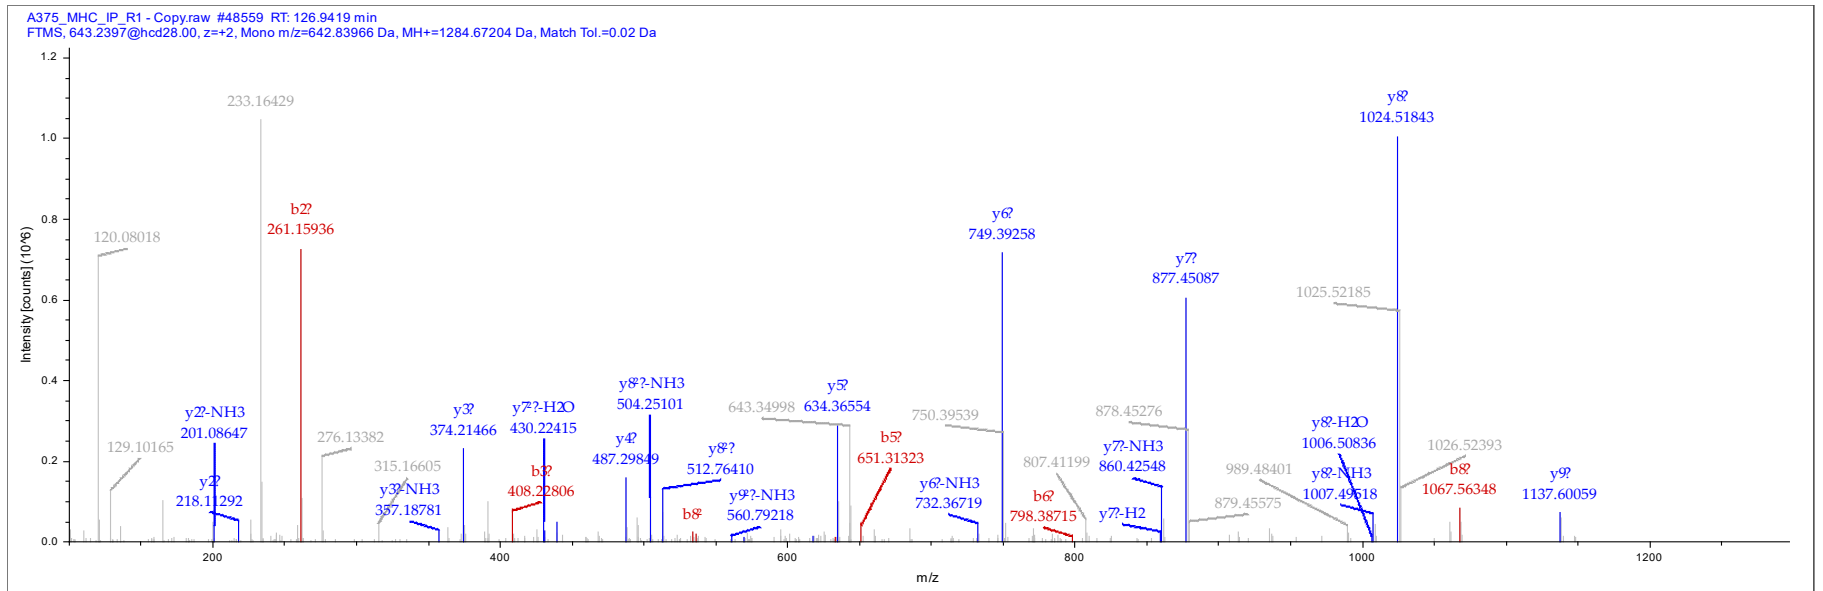

# Spliced peptide - FLLQLPLV

Synthetic

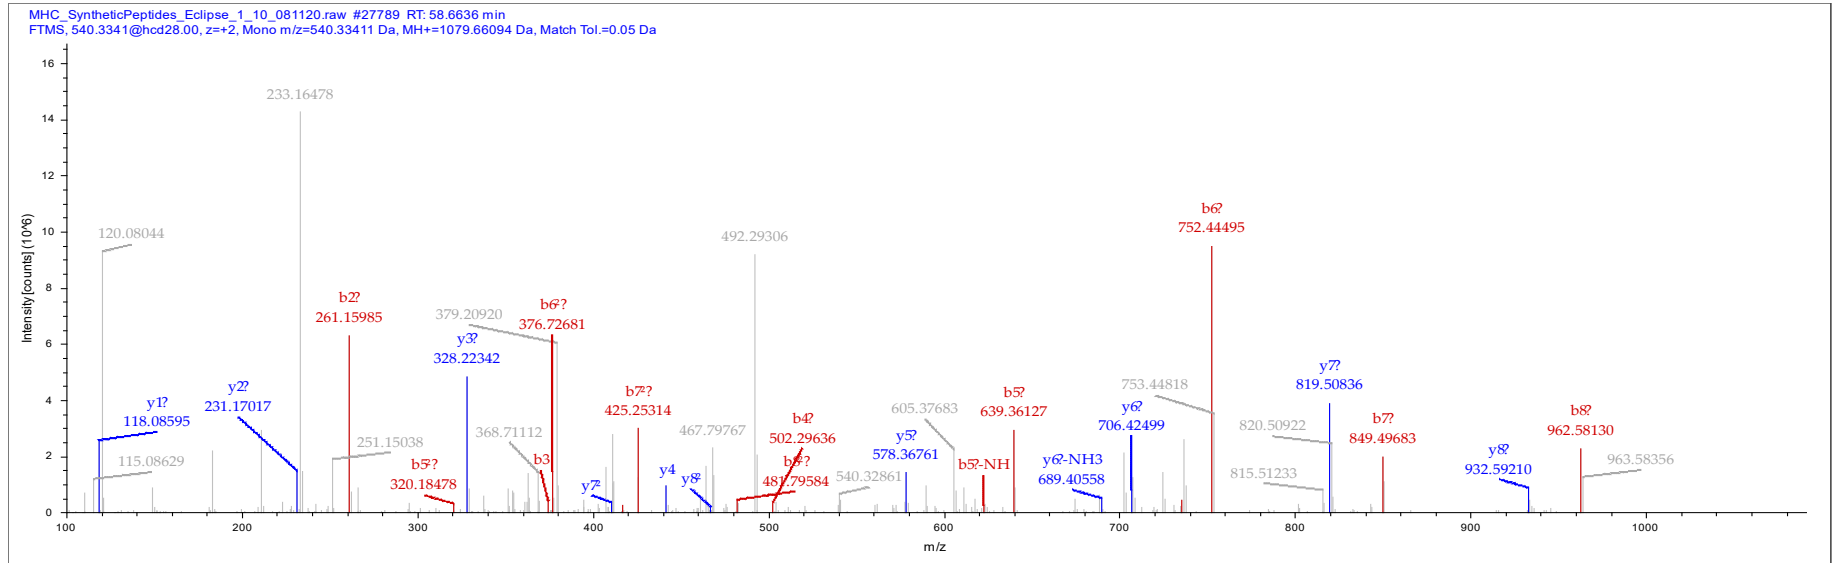

Experimental

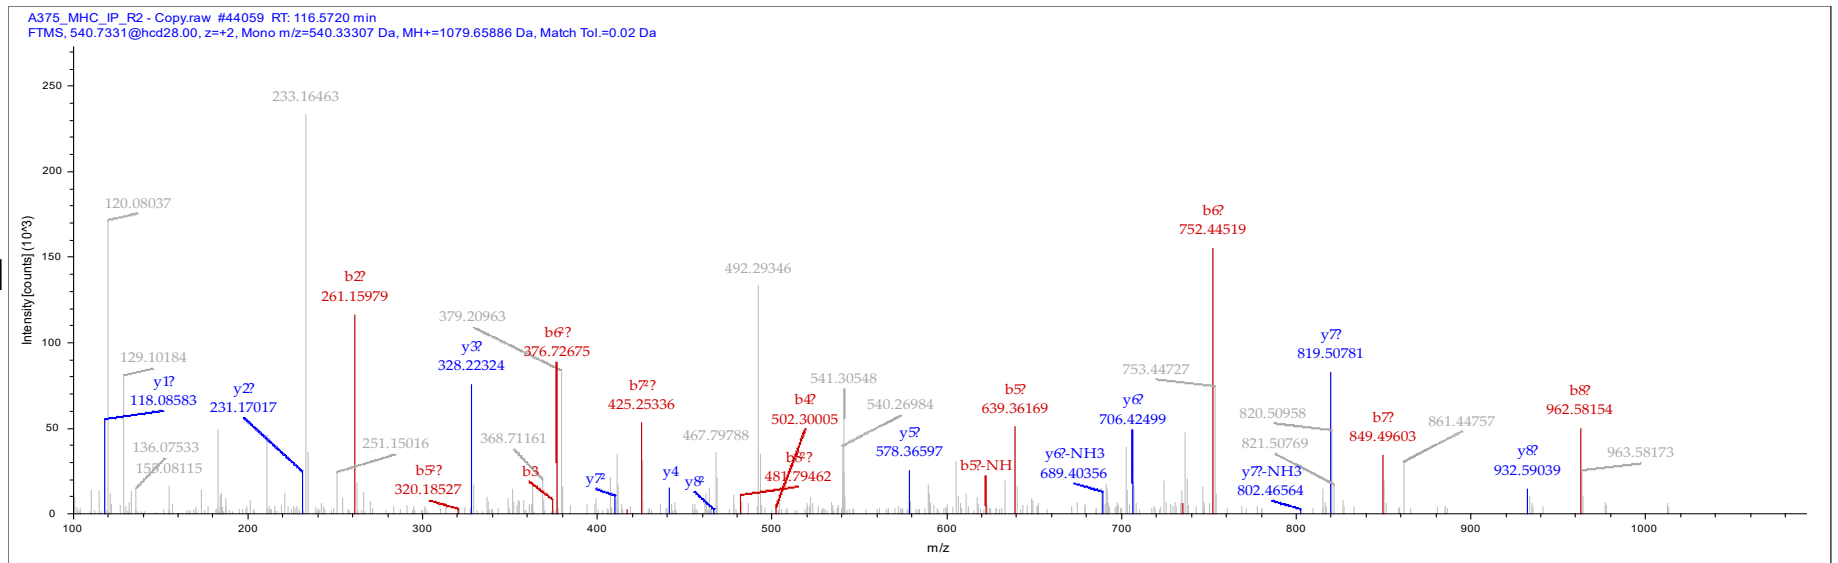

# Spliced peptide - FQDPYTRSL

Synthetic

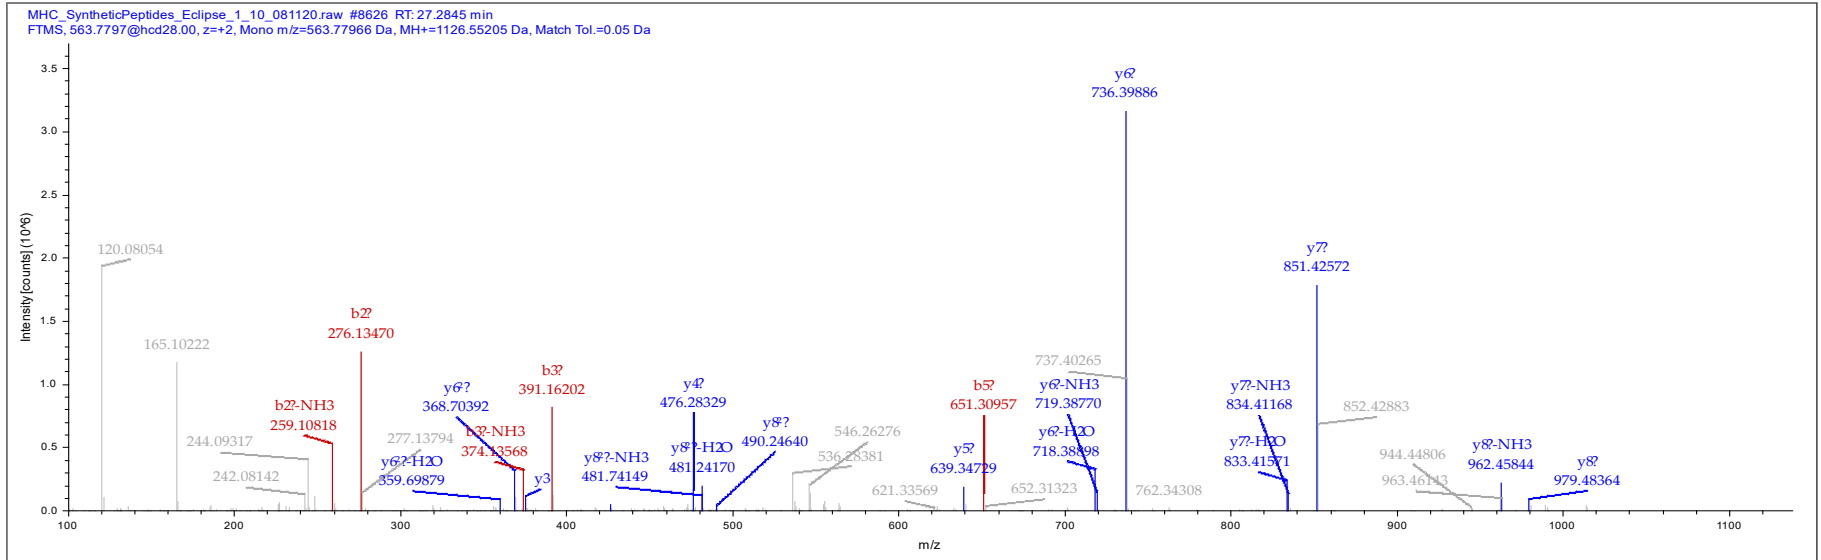

Experimental

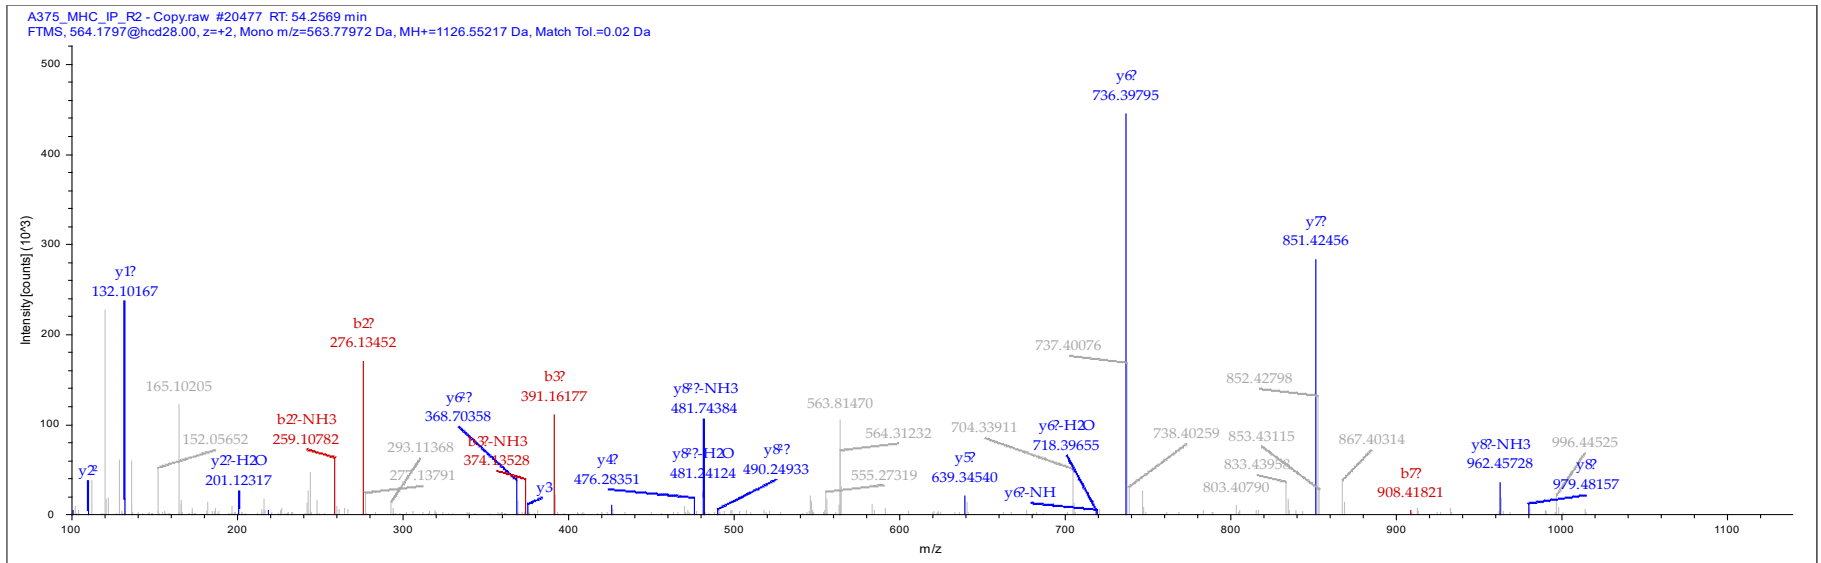



# Spliced peptide - HALPLLKEY

Synthetic

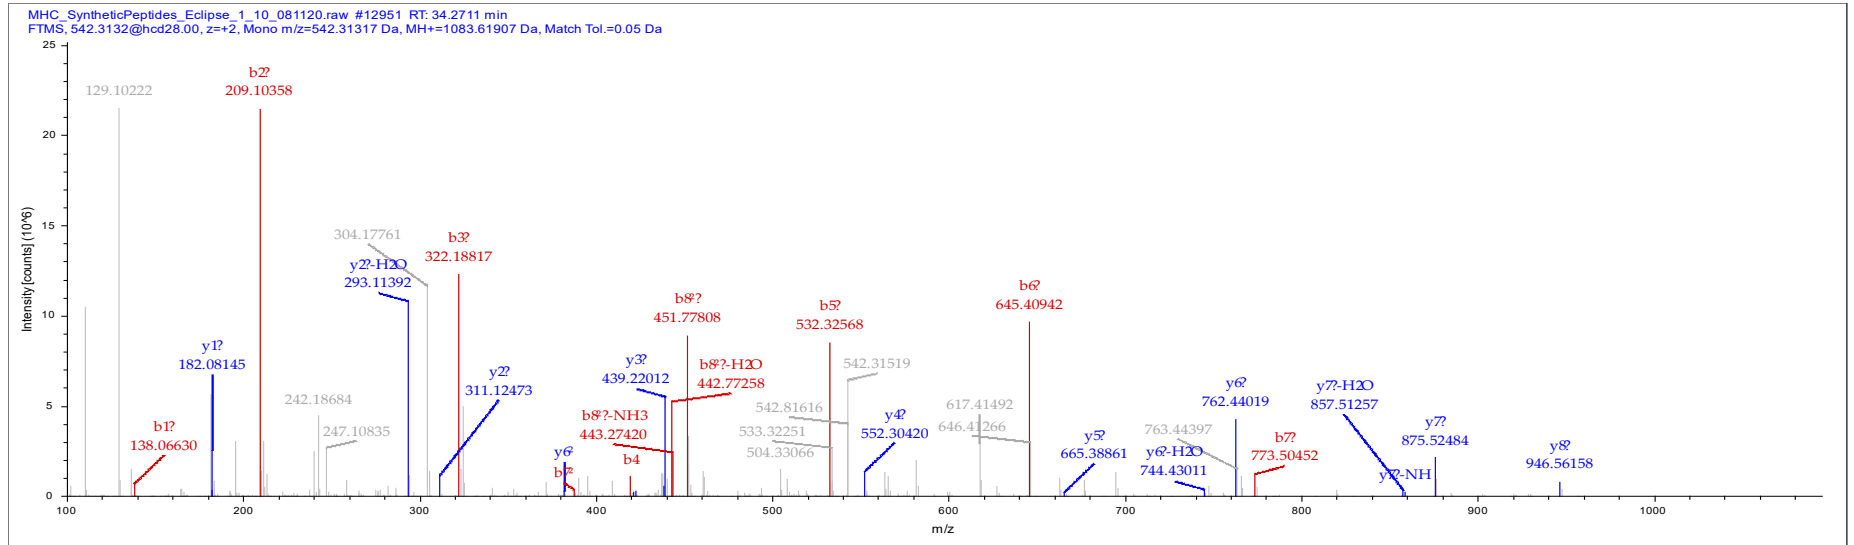

Experimental

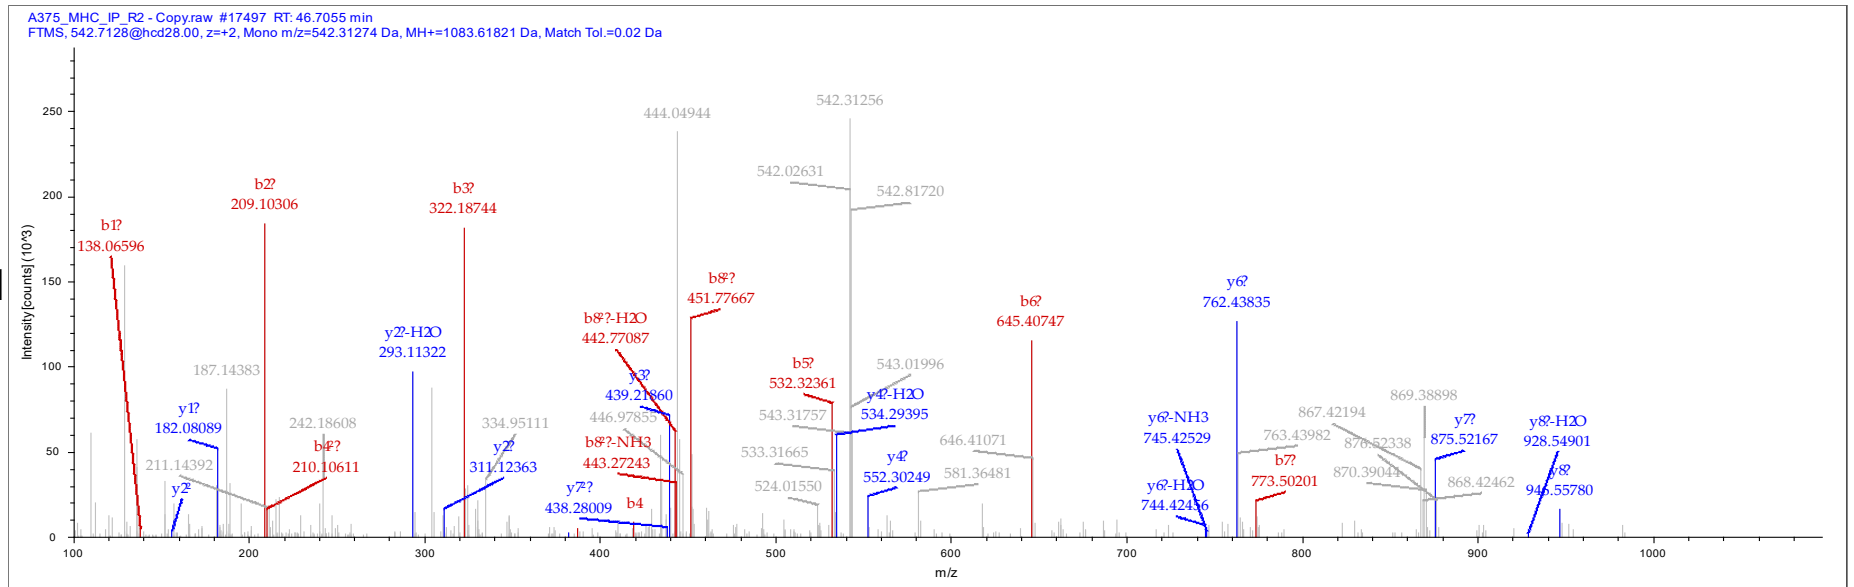

# Spliced peptide - HVVDLVRQL

Synthetic

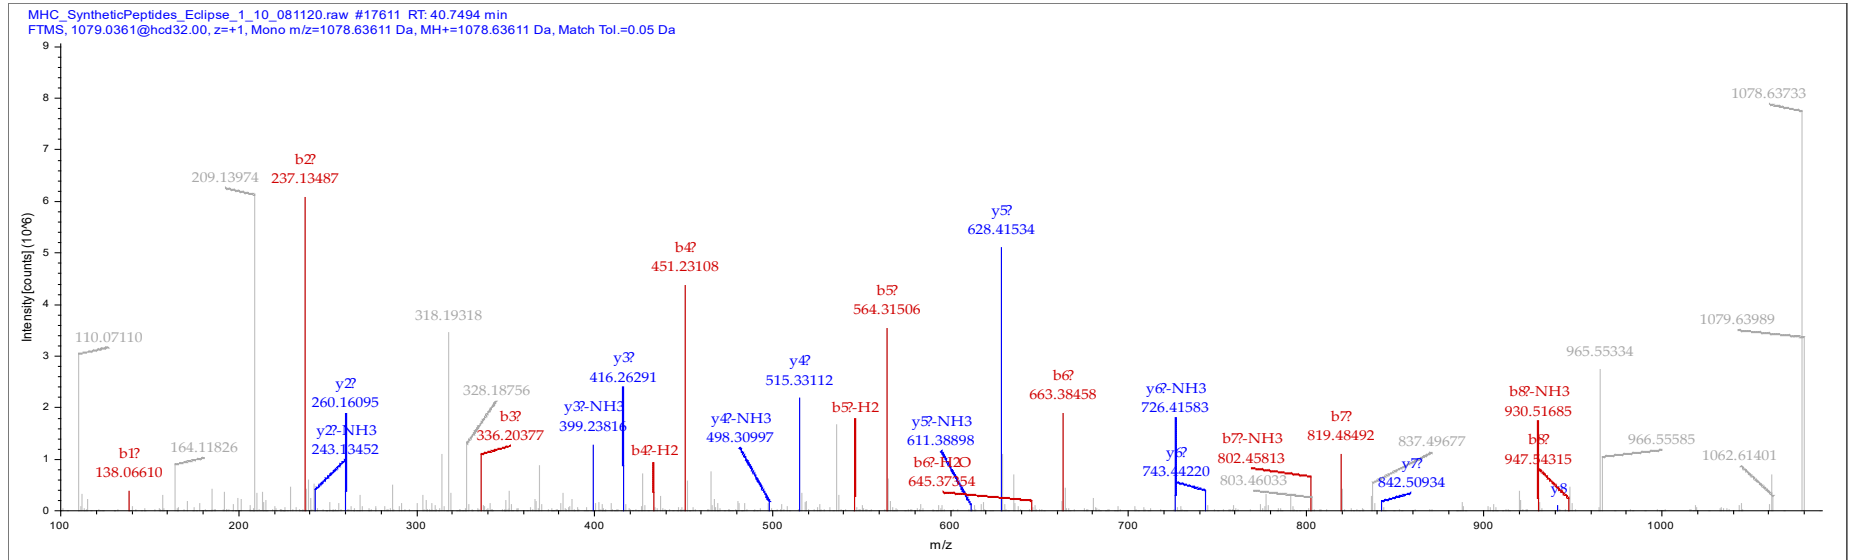

Experimental

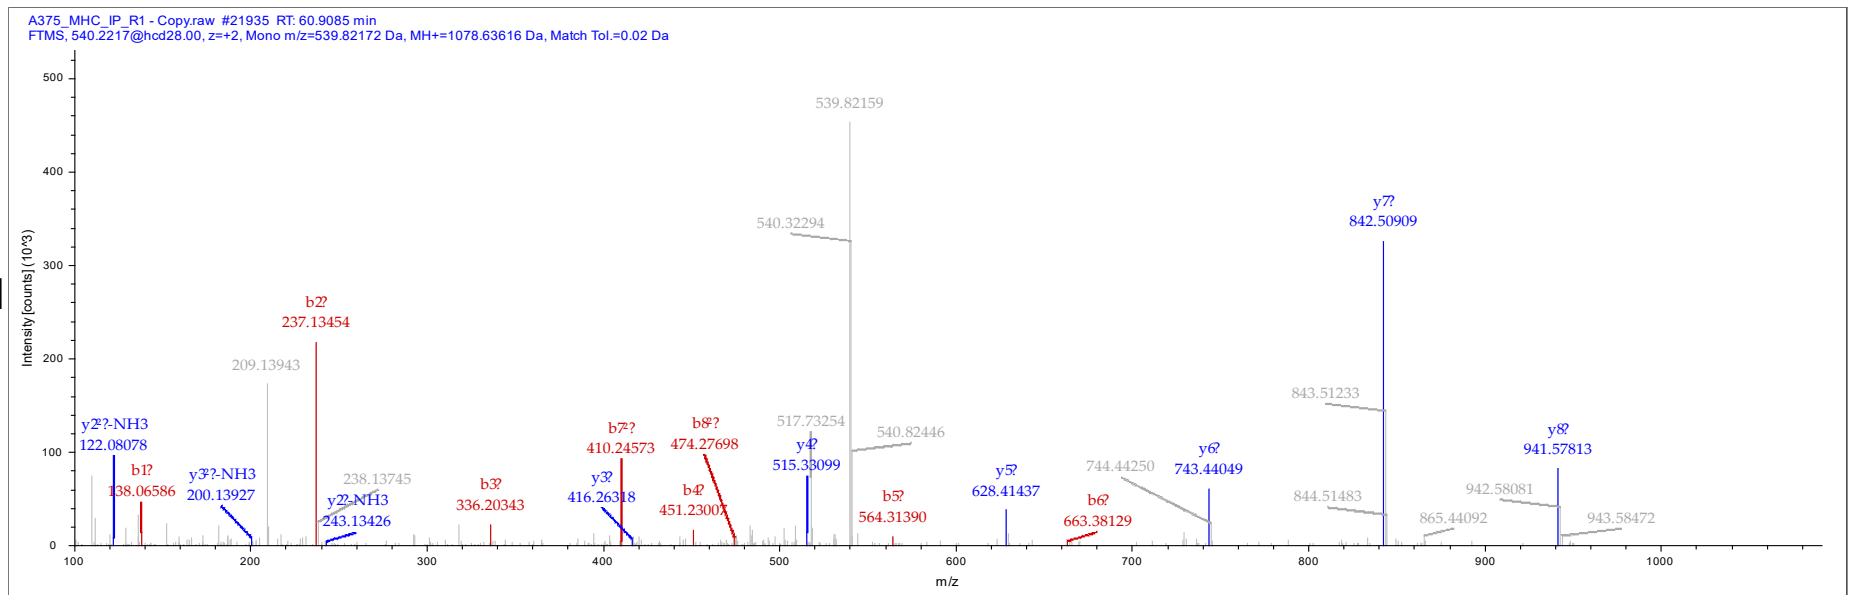

# Spliced peptide - KVLDLLRKF

Synthetic

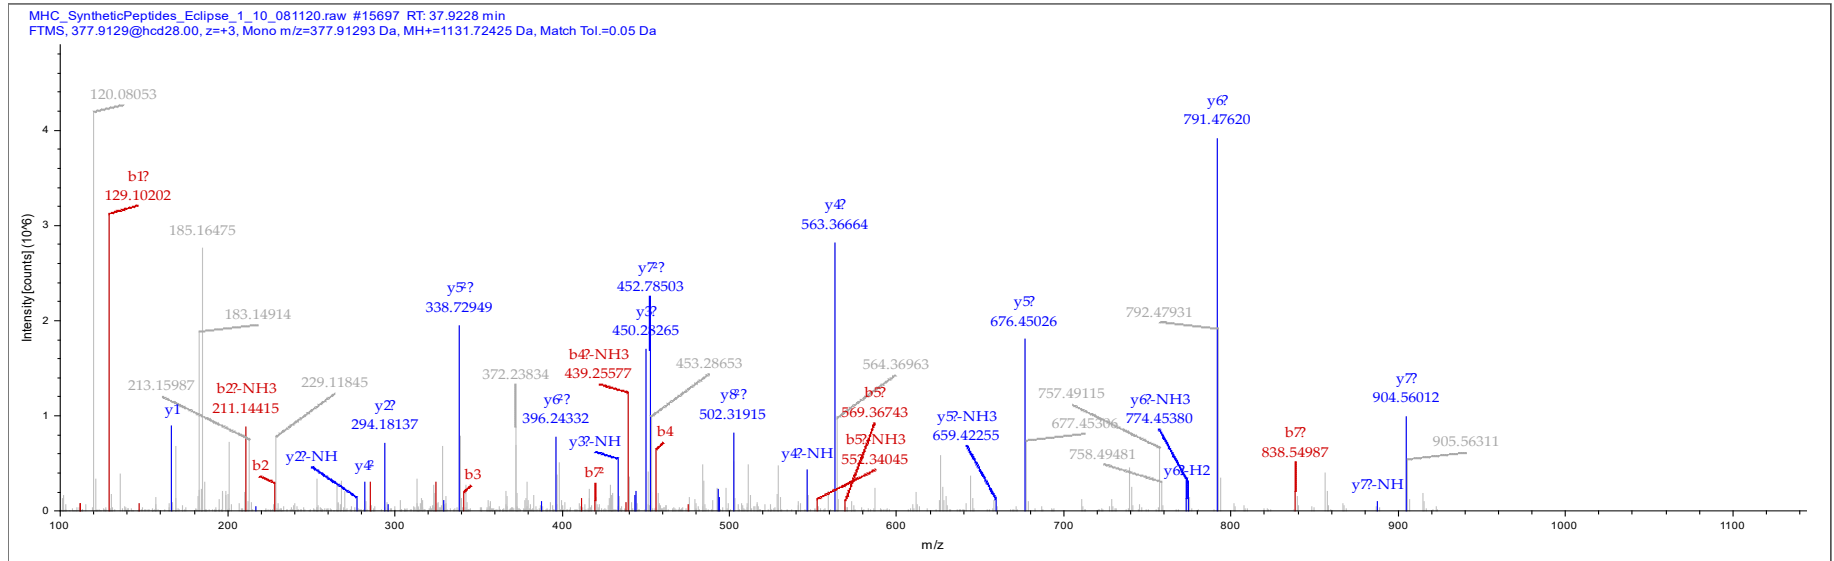

Experimental

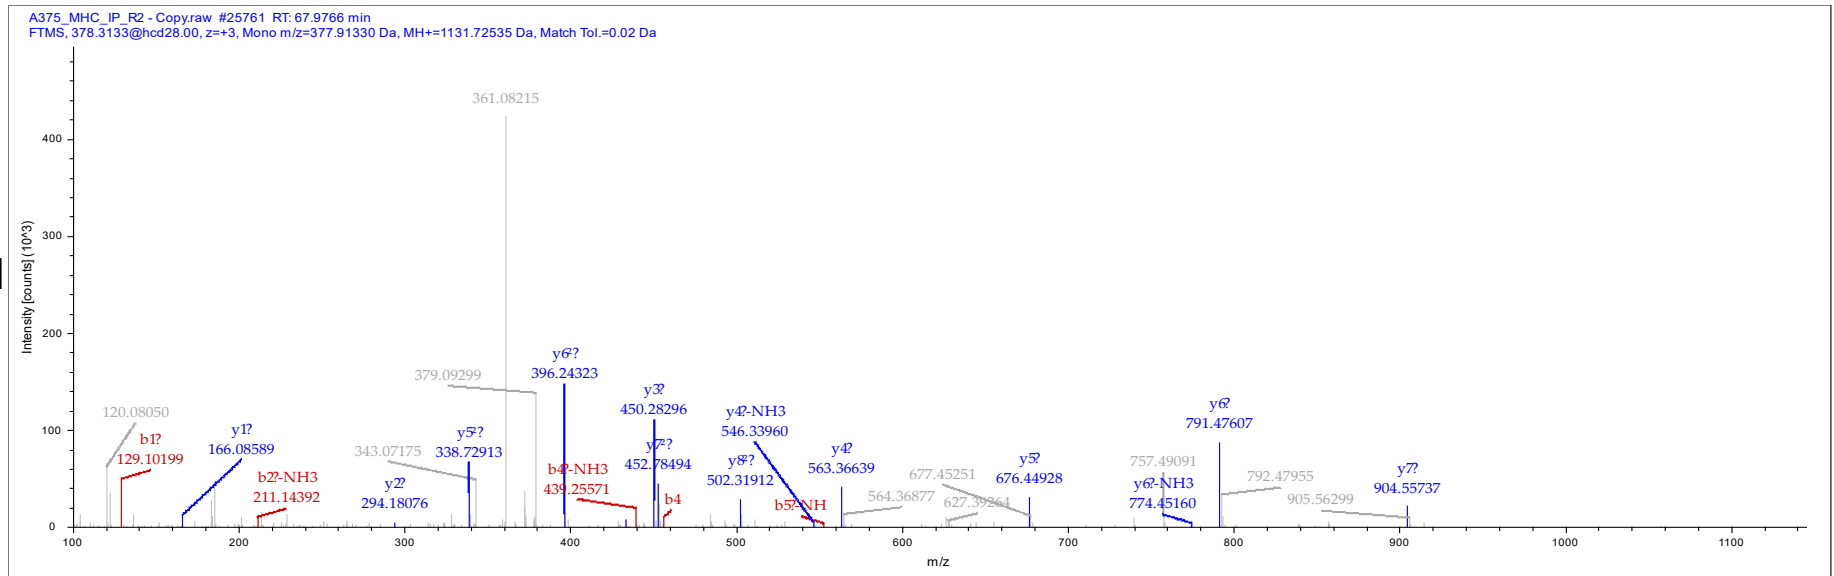

# Spliced peptide - LELLHKNF

Synthetic

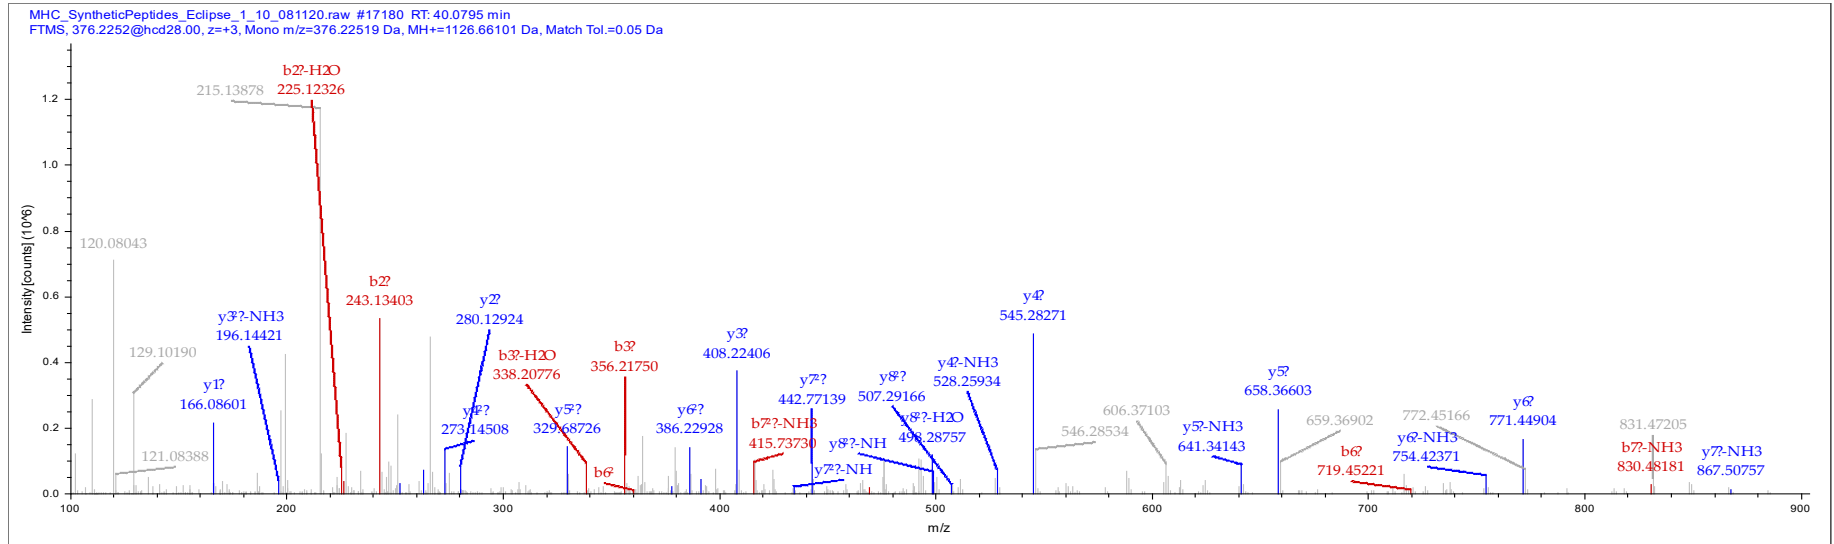

Experimental

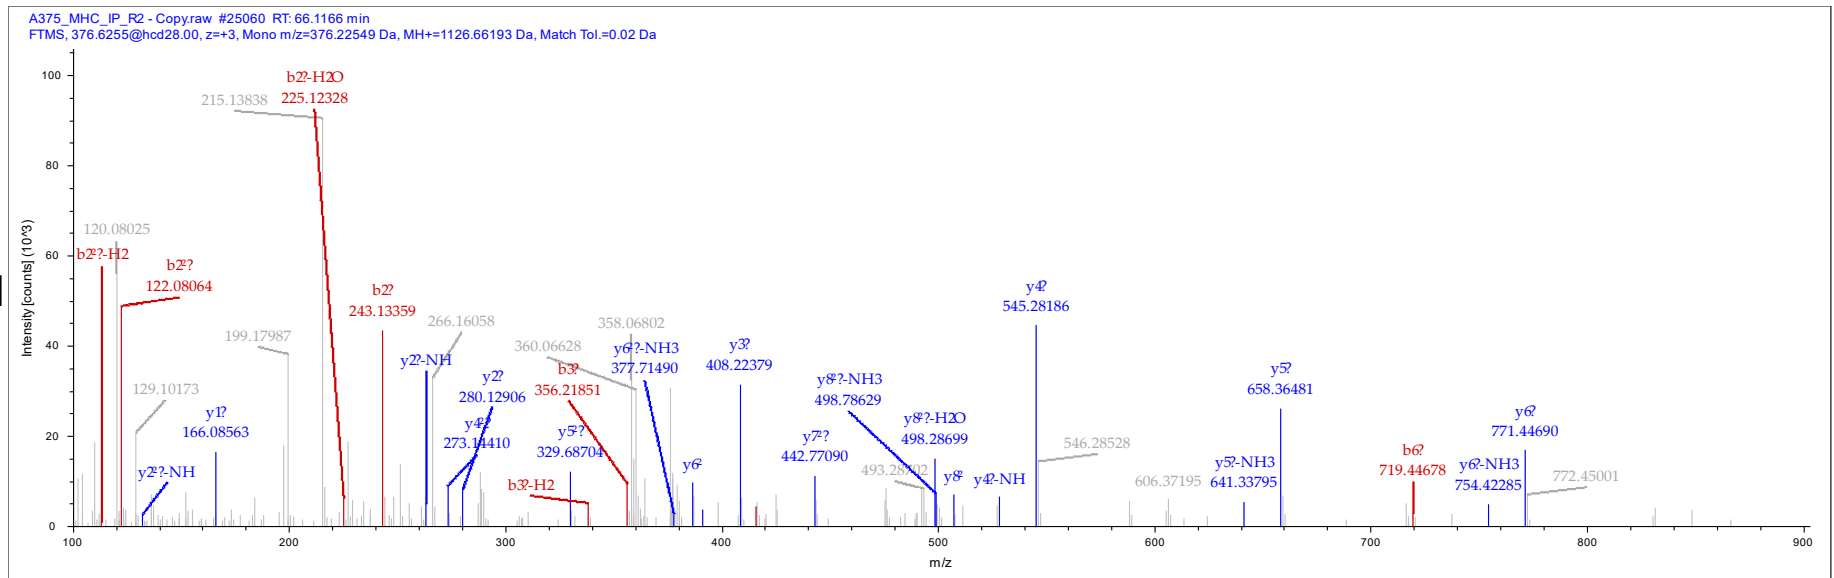

# Spliced peptide - LERAFLLKKL

Synthetic

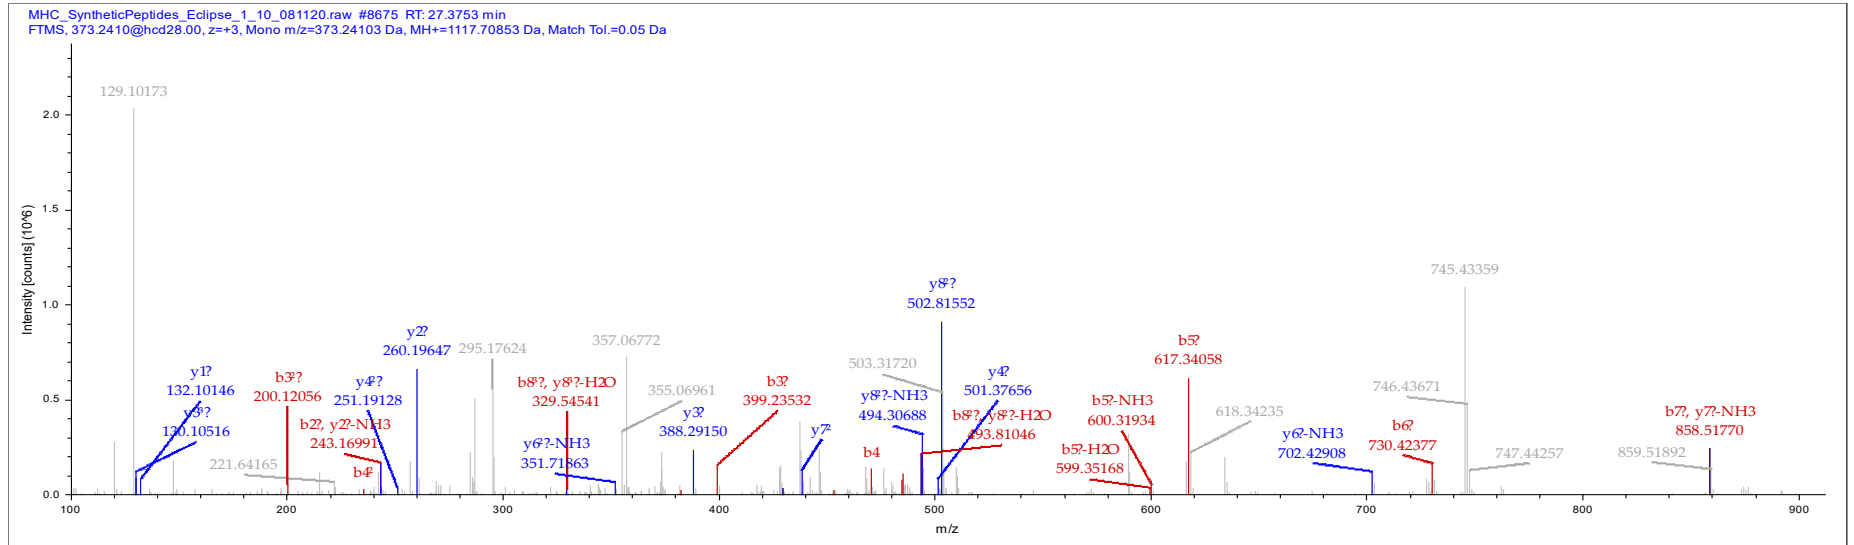

Experimental

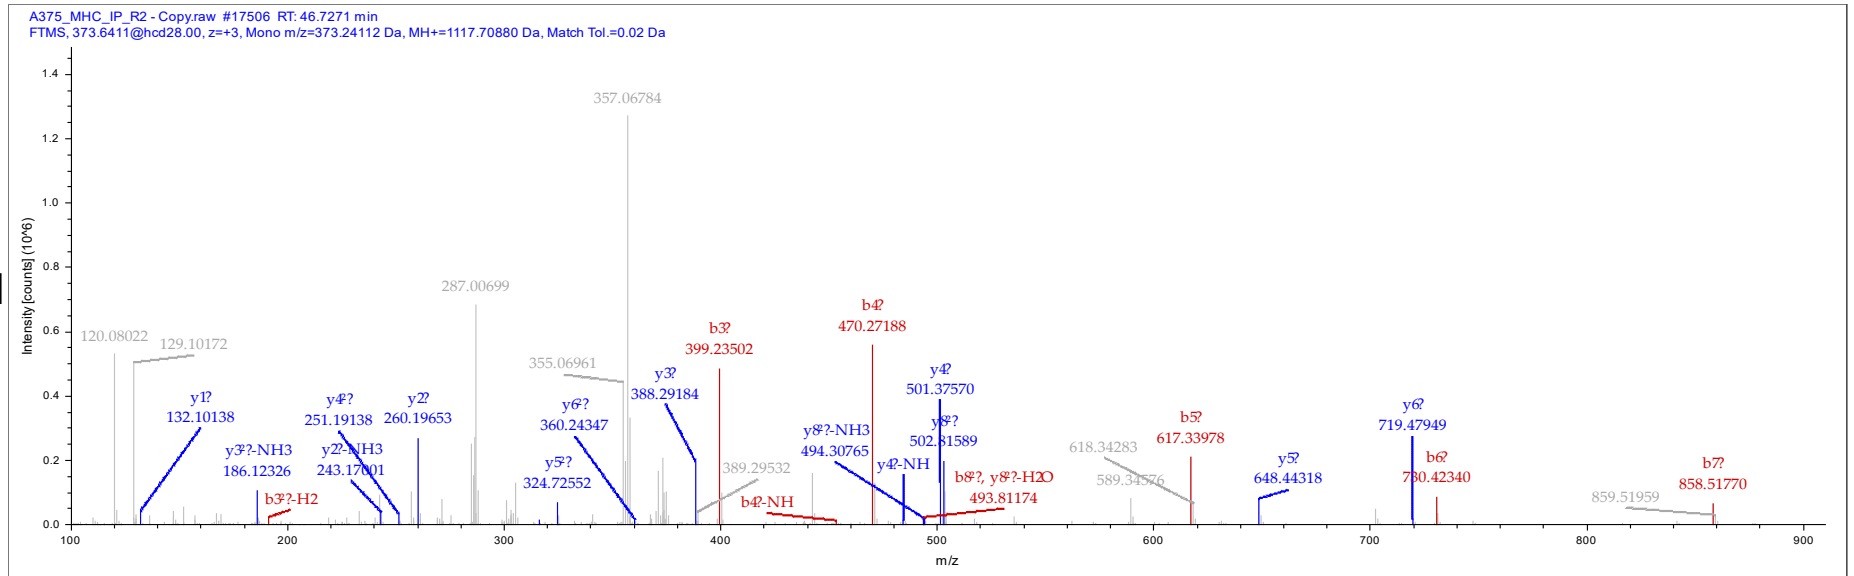

# Spliced peptide - LGGGDFLQKL

Synthetic

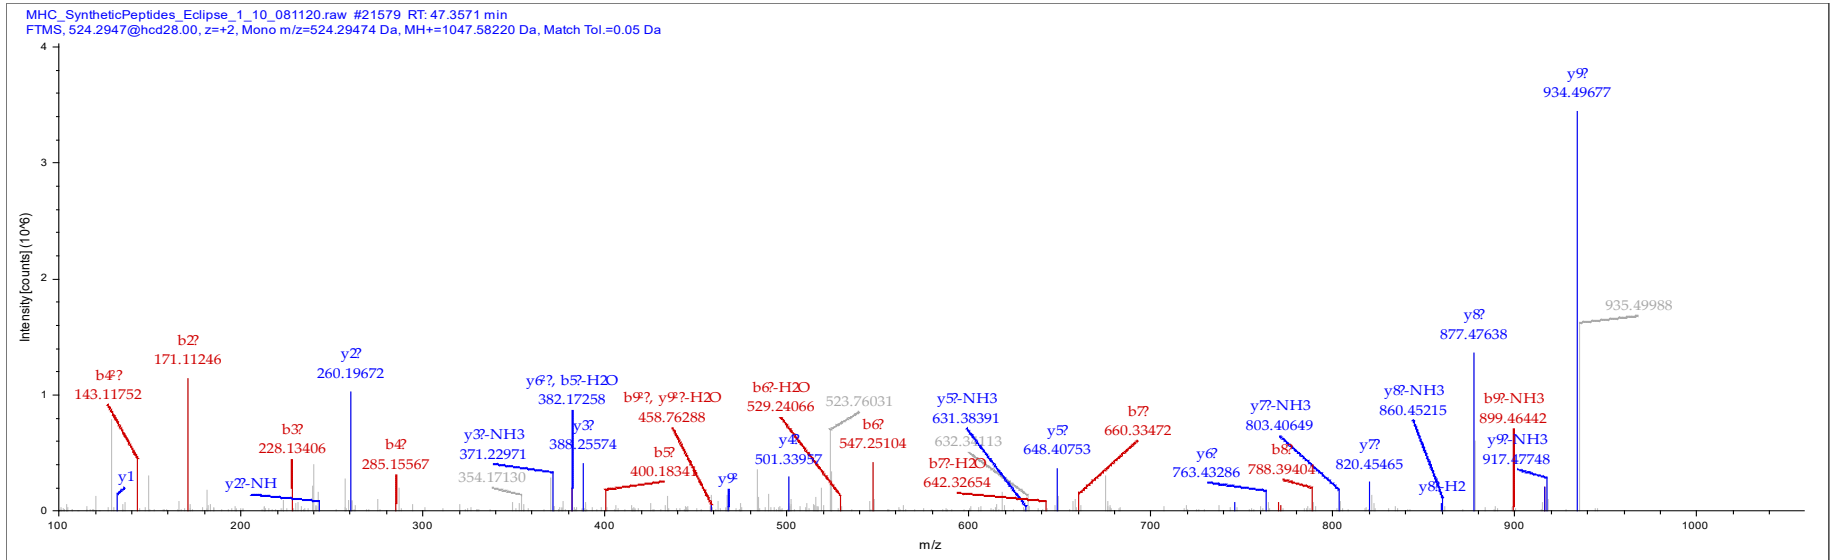

Experimental

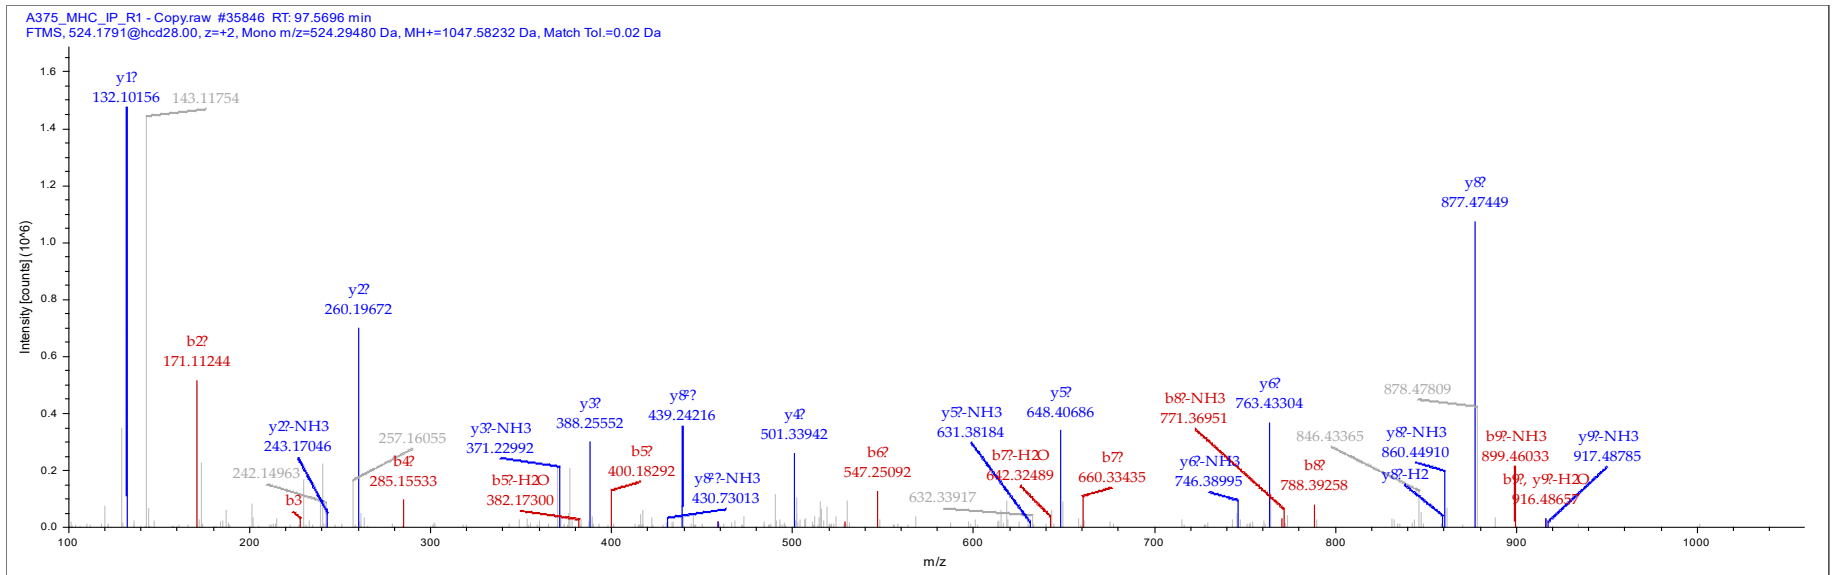

# Spliced peptide - LGLEKGGLEL

Synthetic

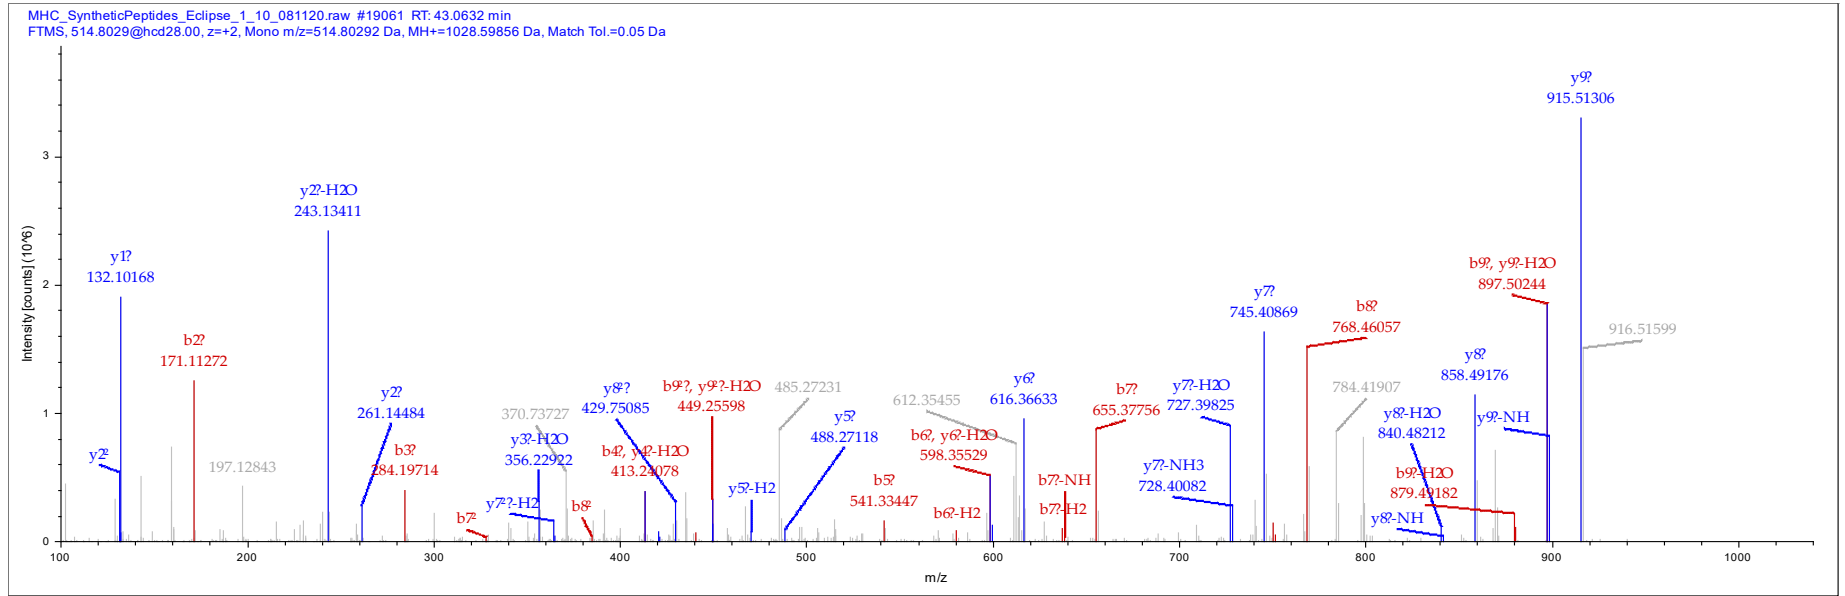

Experimental

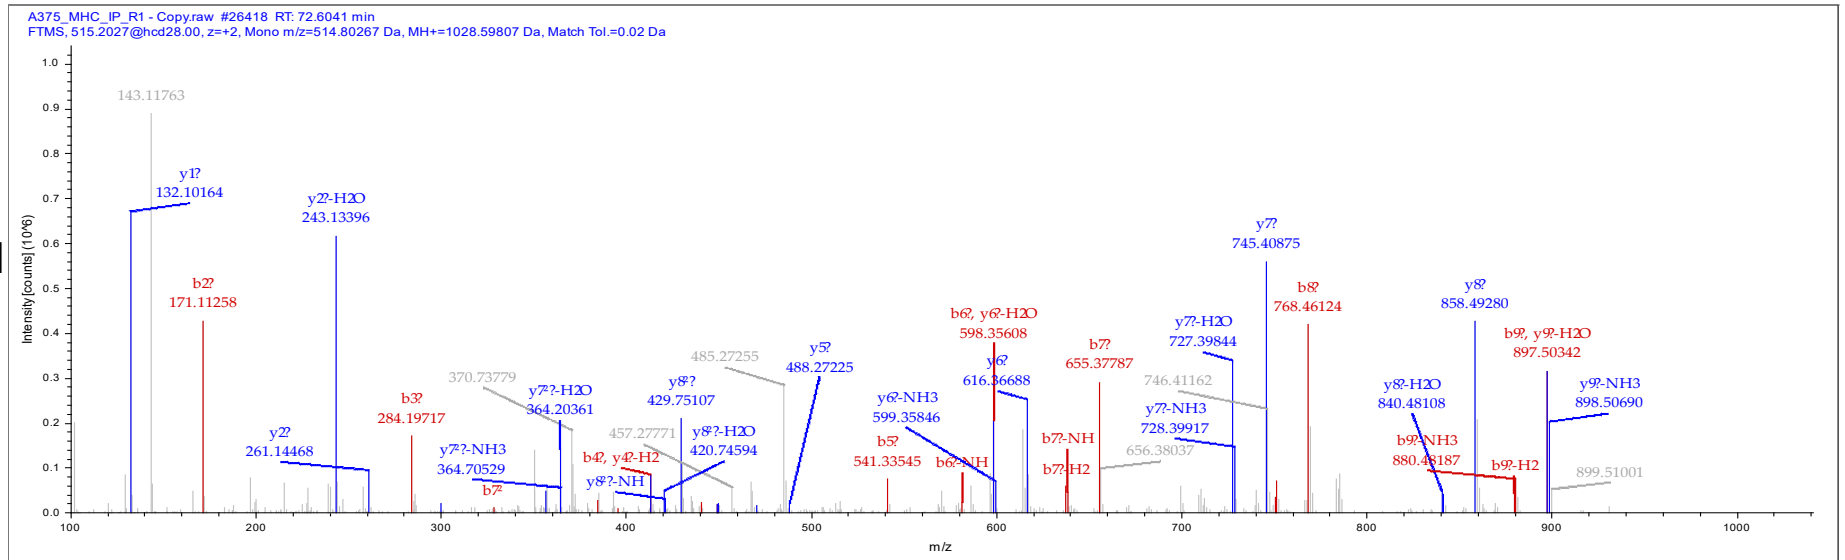

# Spliced peptide - LRFDTQSKEKL

Synthetic

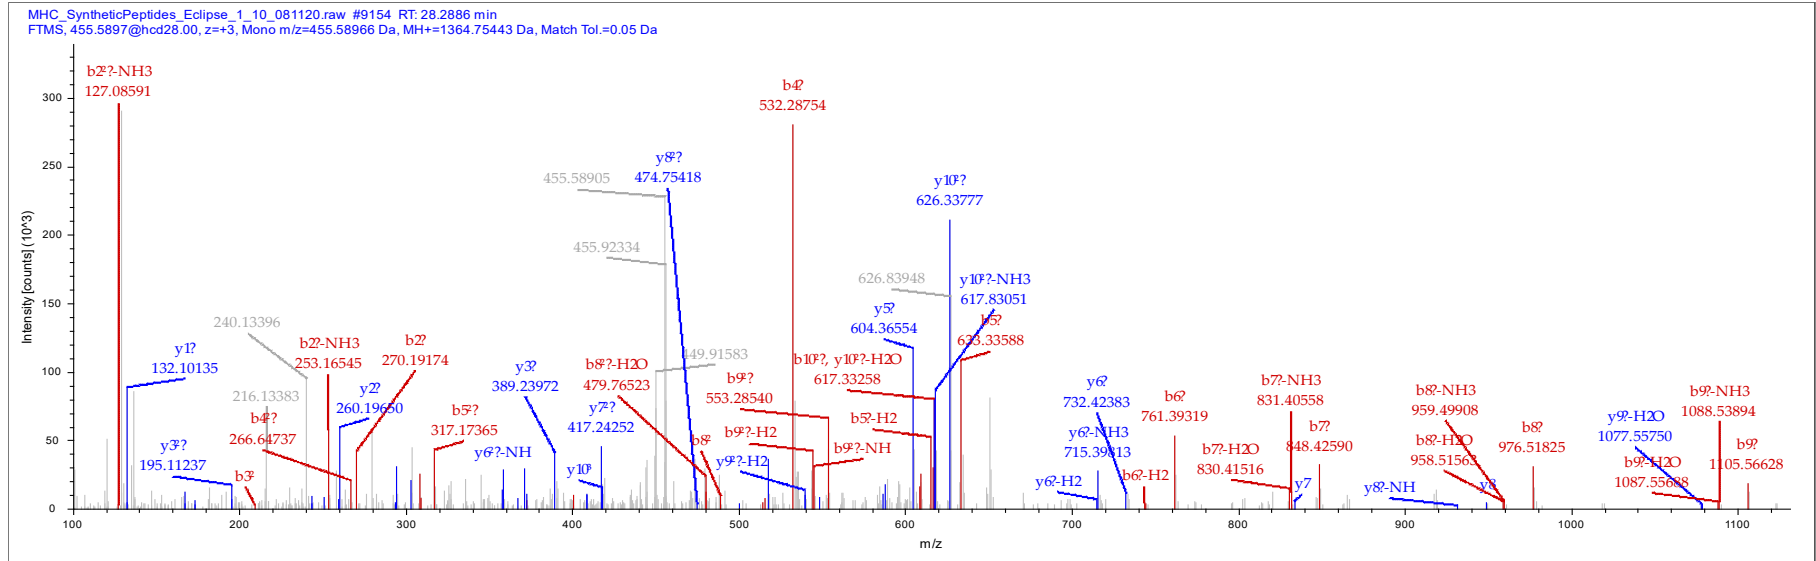

Experimental

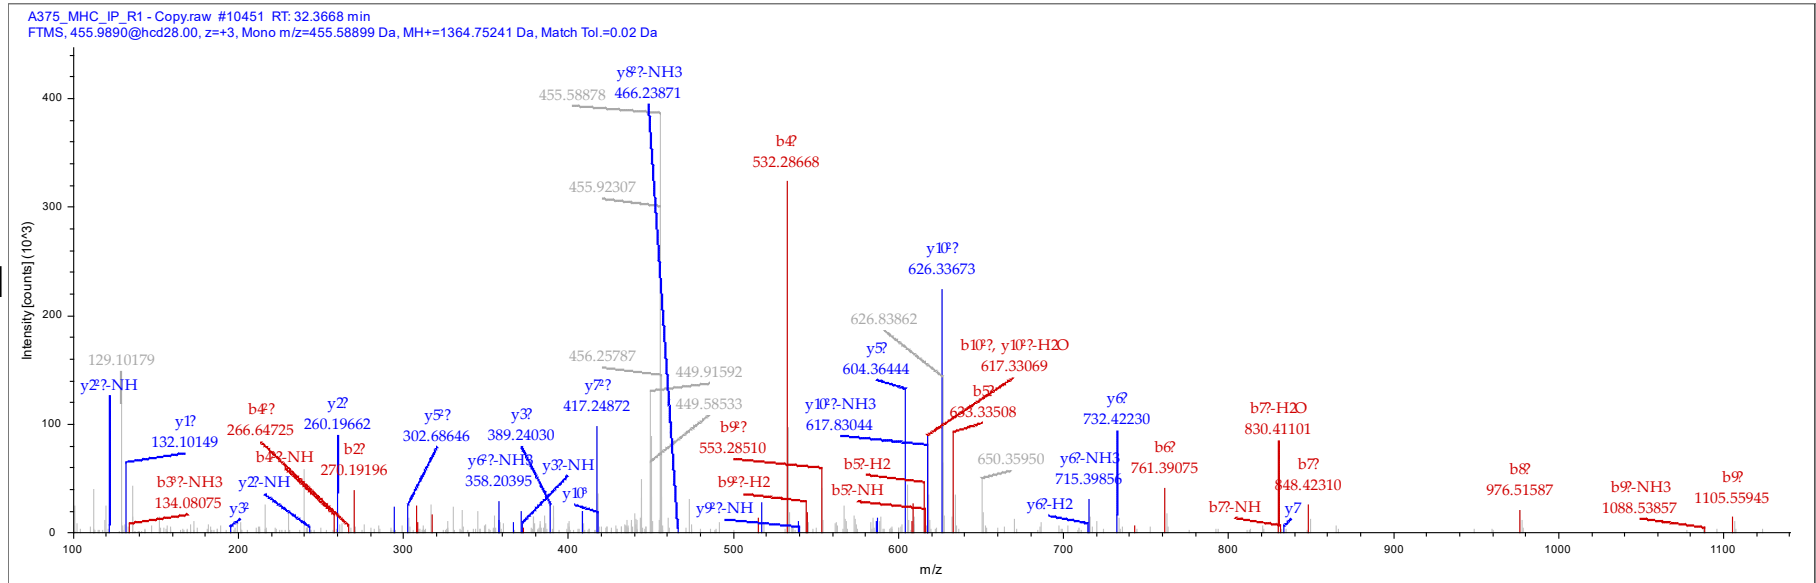



# Spliced peptide - LTRPKLEKL

Synthetic

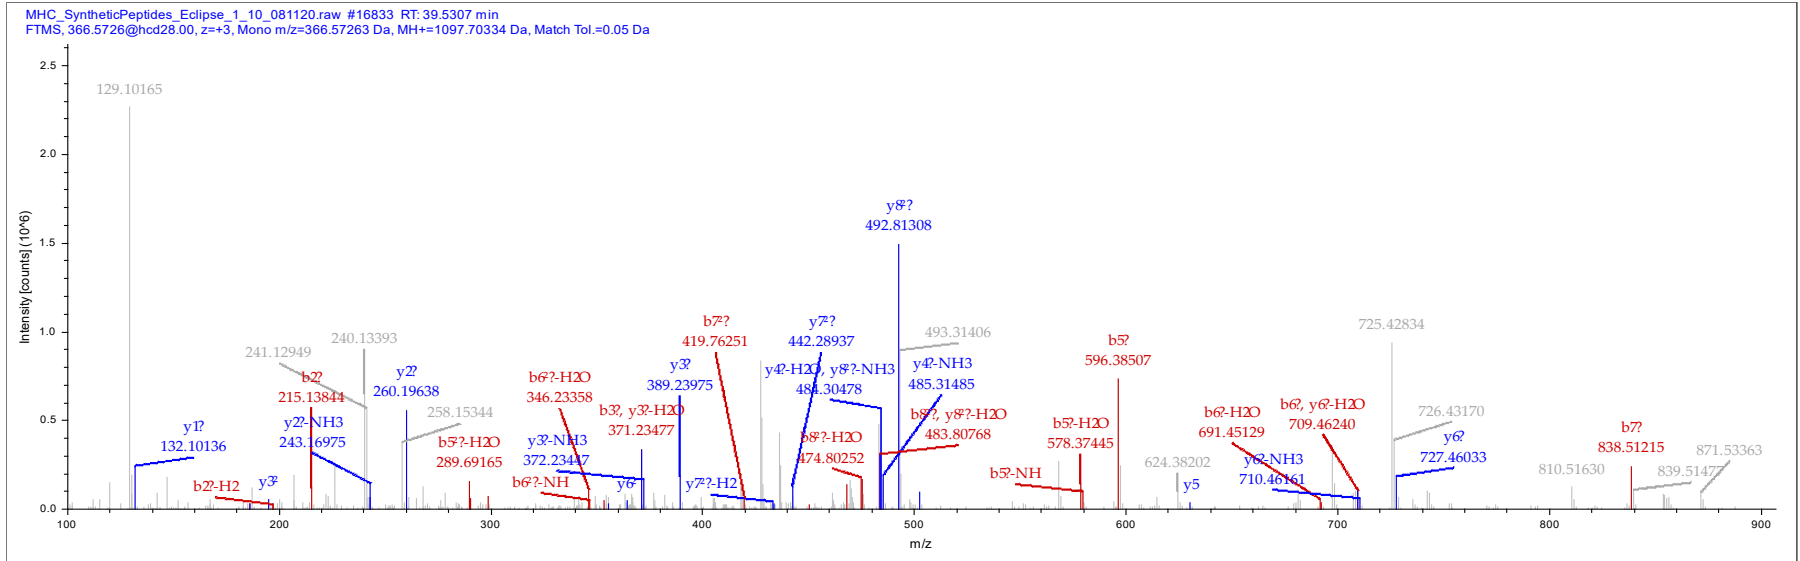

Experimental

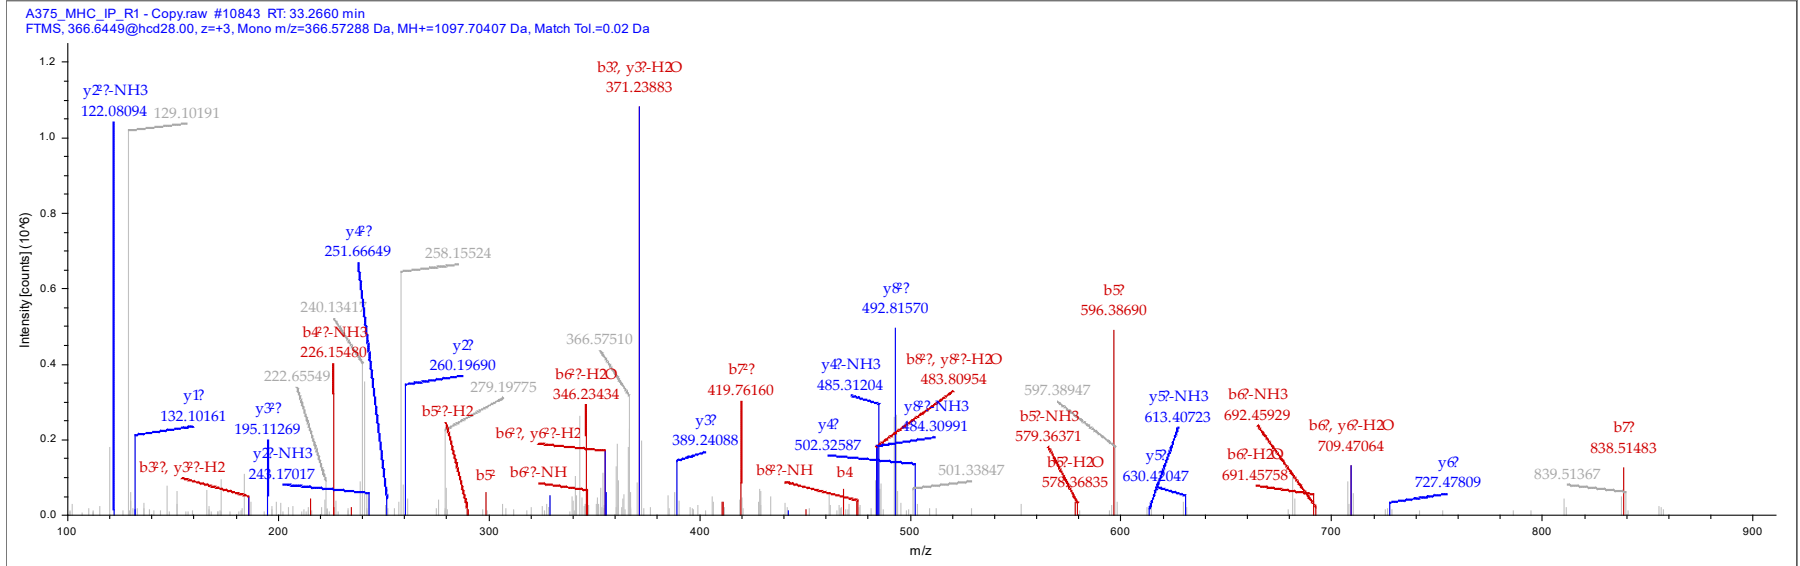

# Spliced peptide - NMLPQLVRF

Synthetic

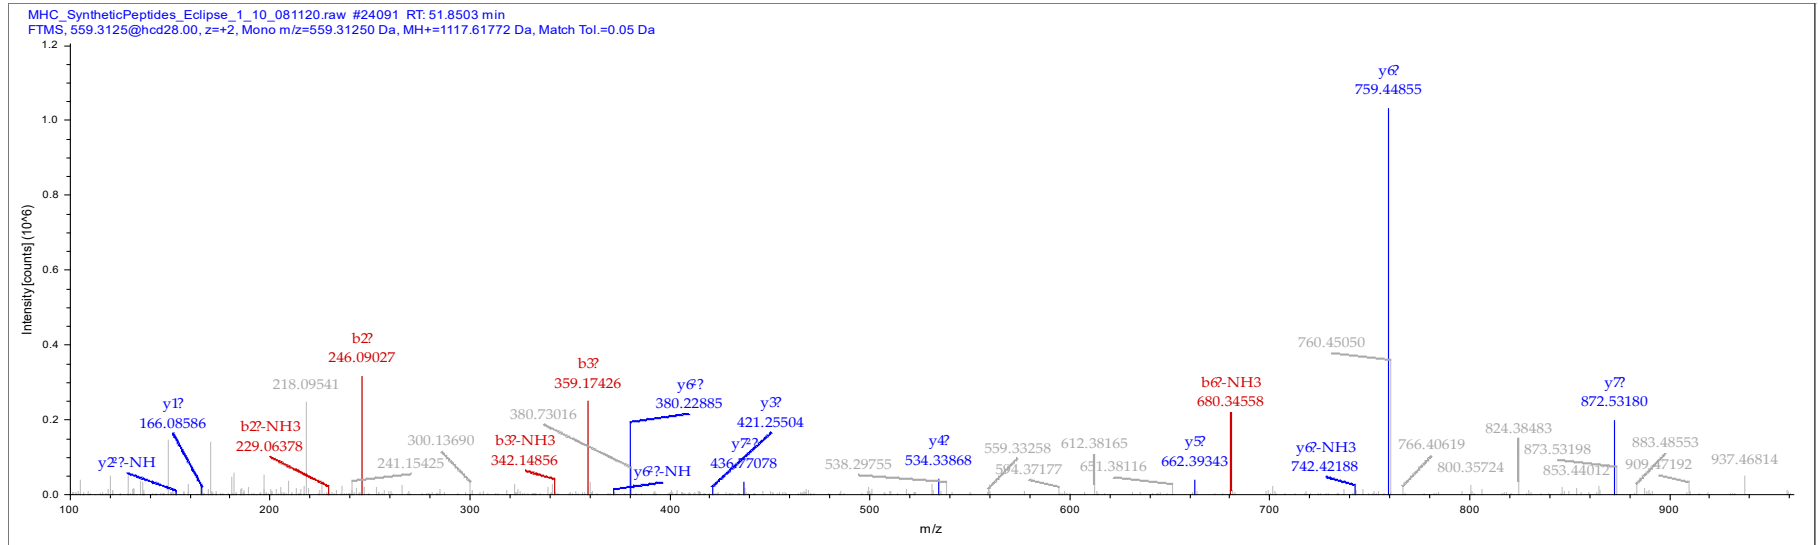

Experimental

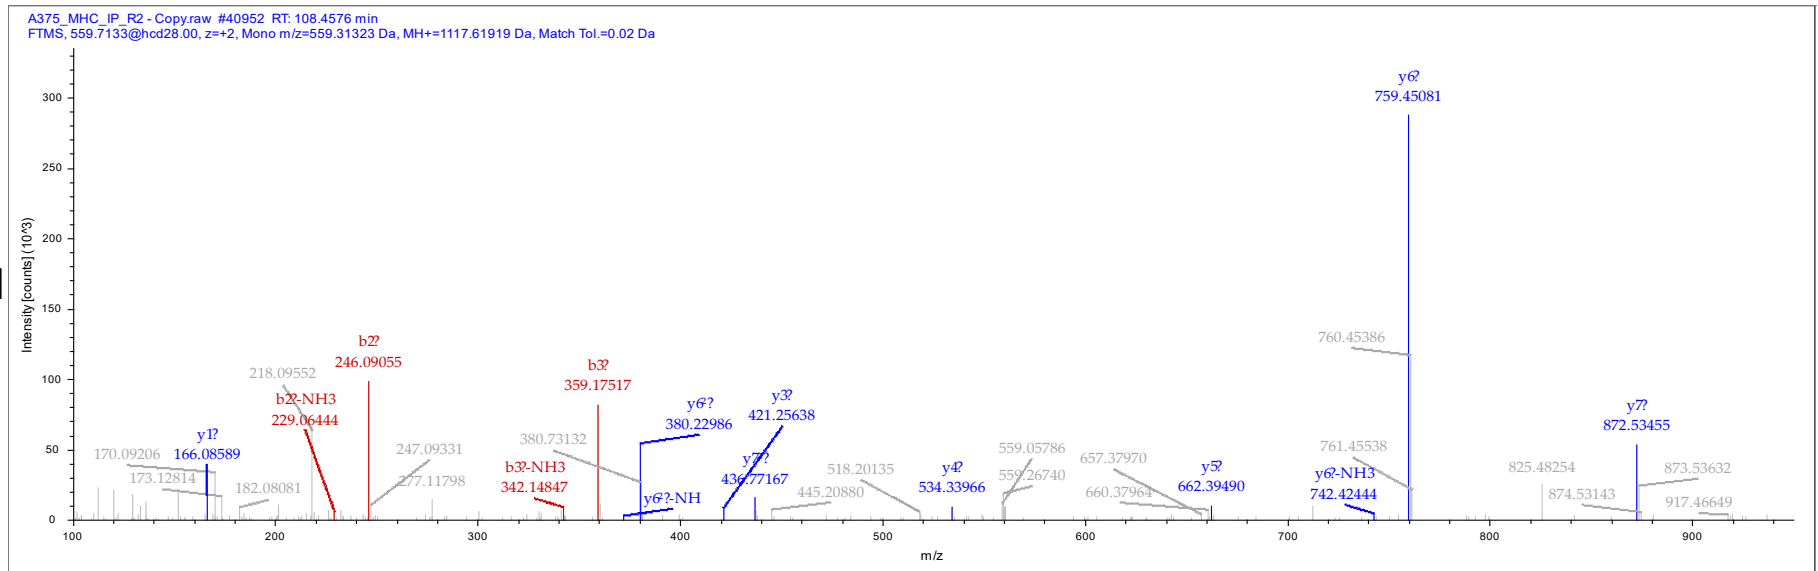

# Spliced peptide - NSDLVLQRY

Synthetic

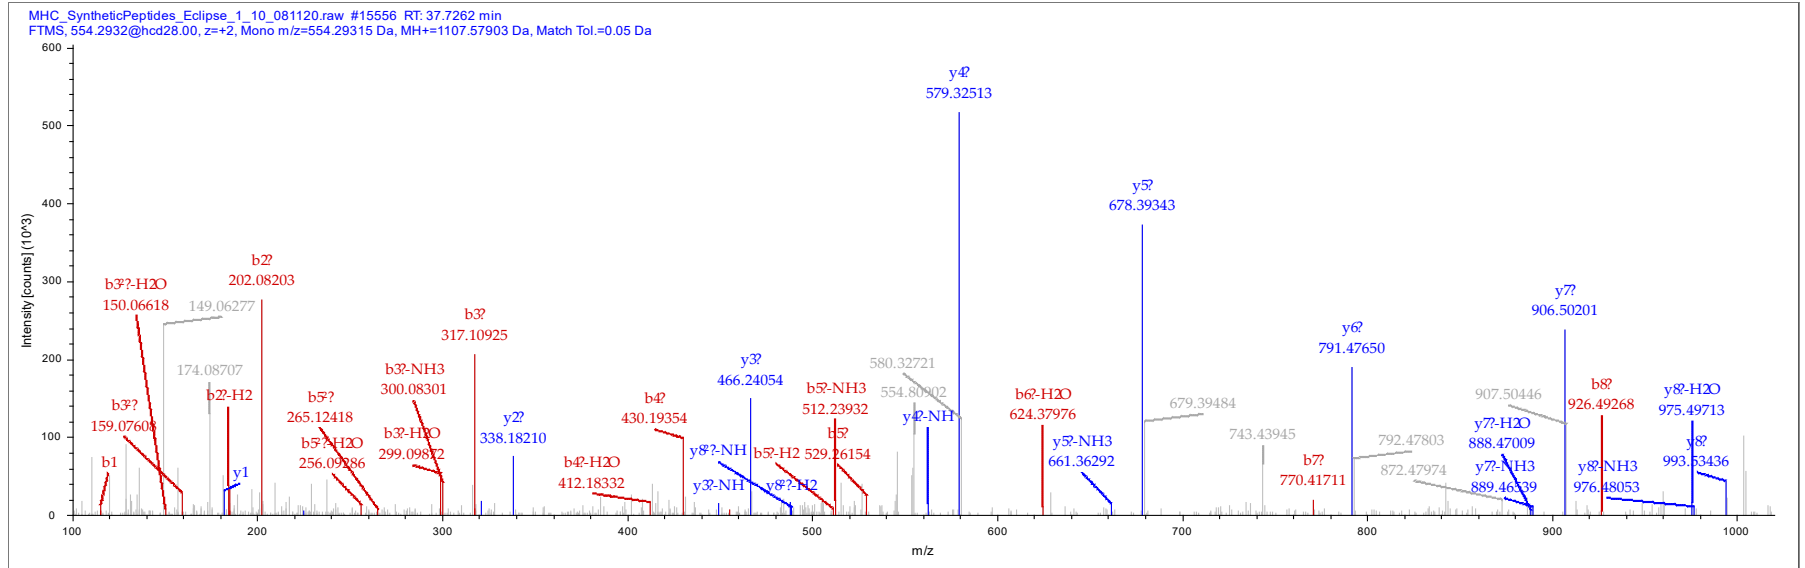

Experimental

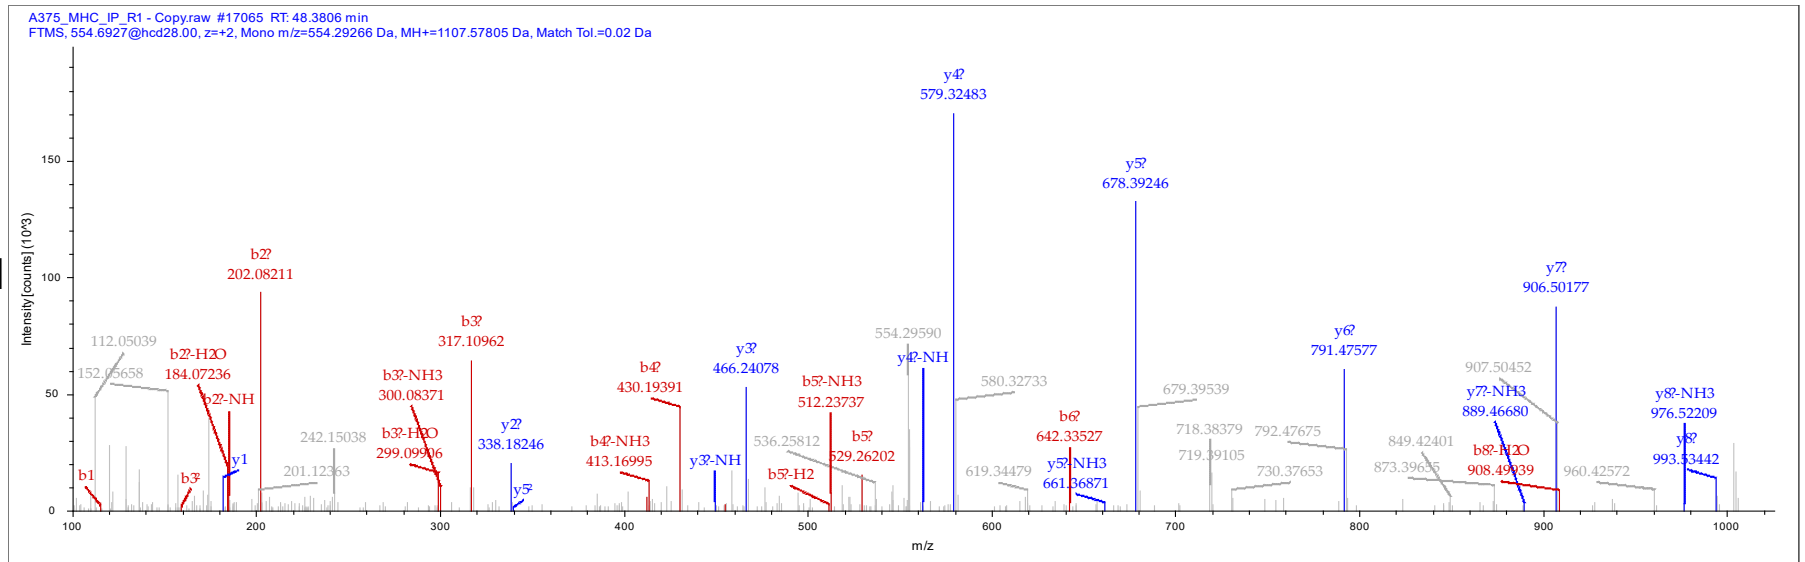

# Spliced peptide - QEHPDLAKKF

Synthetic

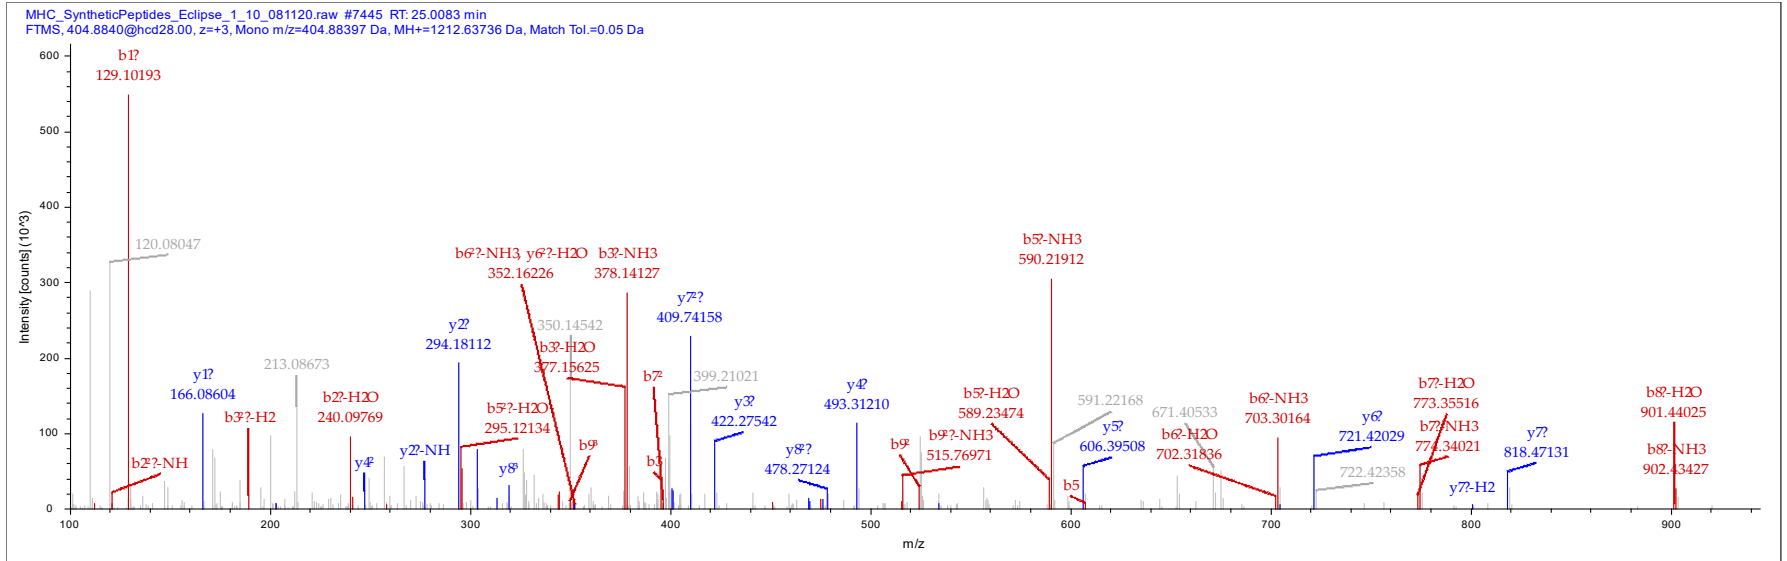

Experimental

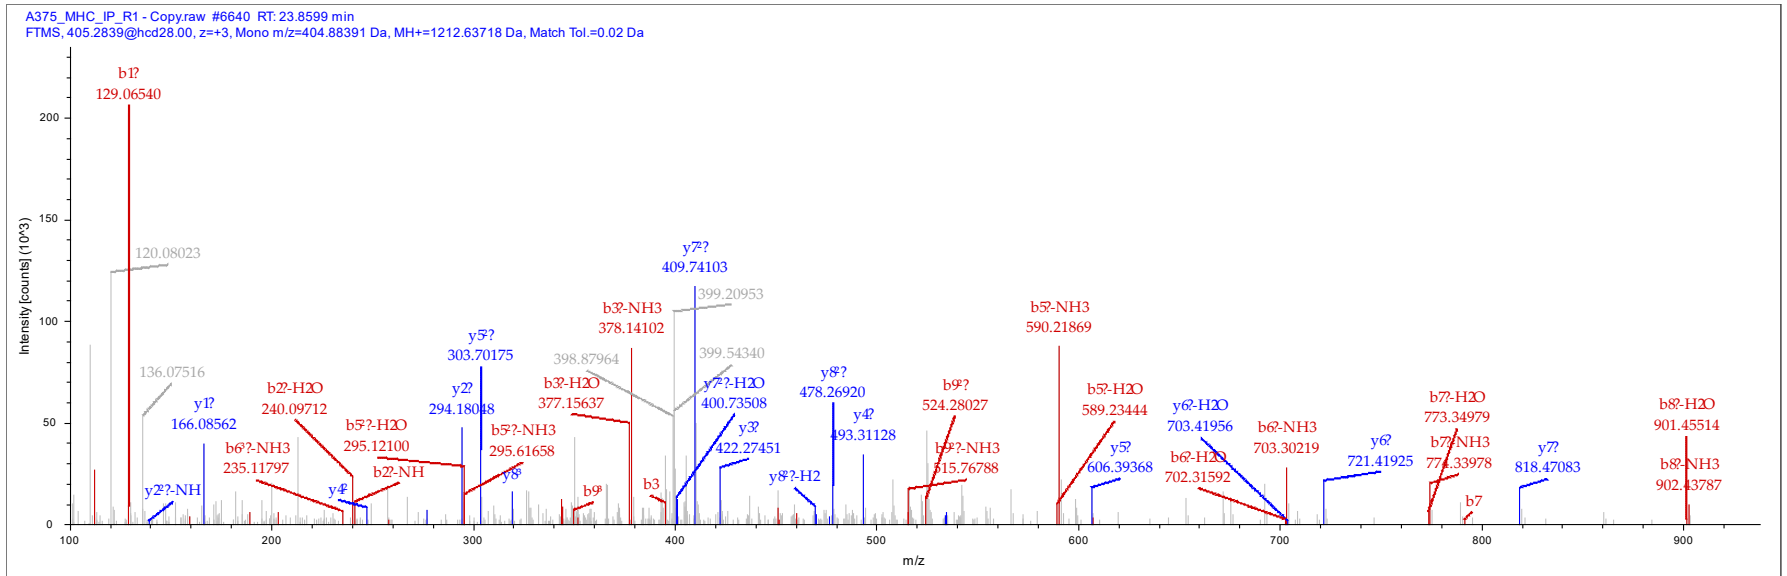

# Spliced peptide - REELFERKY

Synthetic

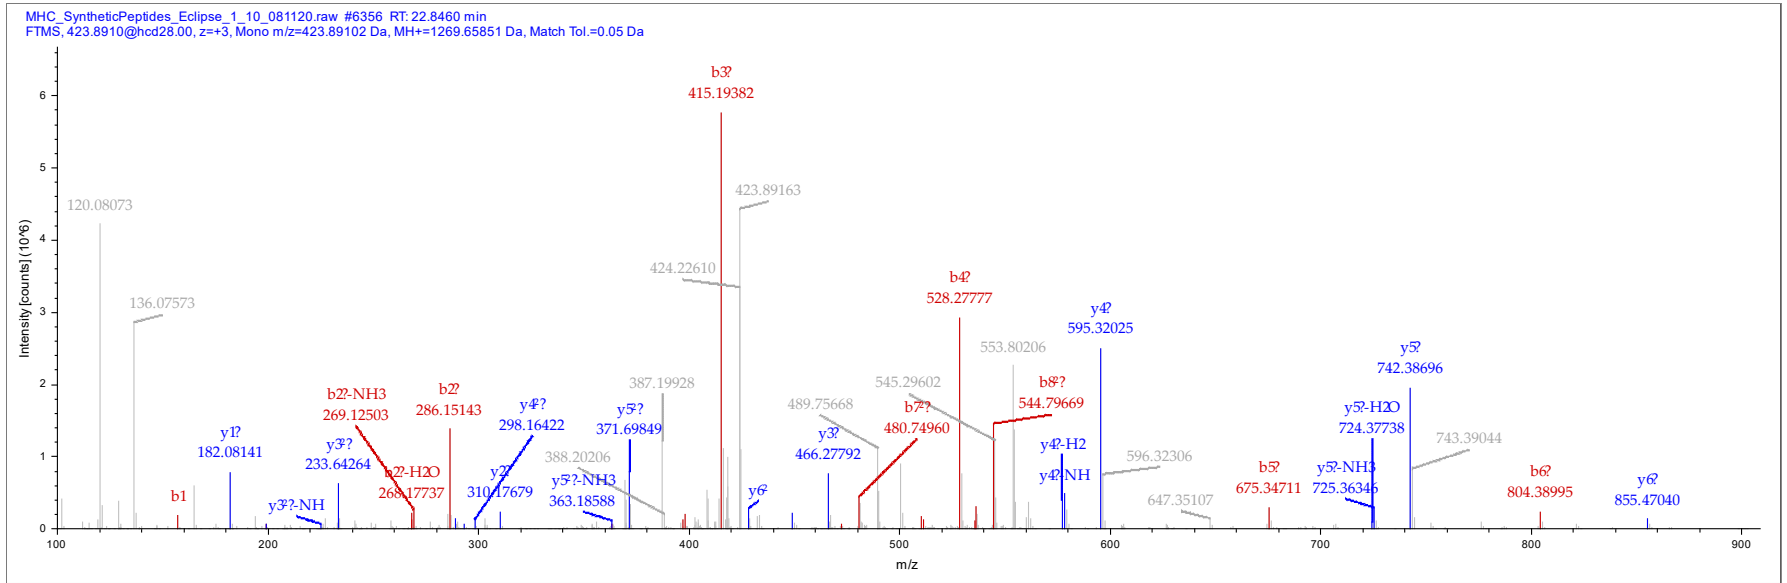

Experimental

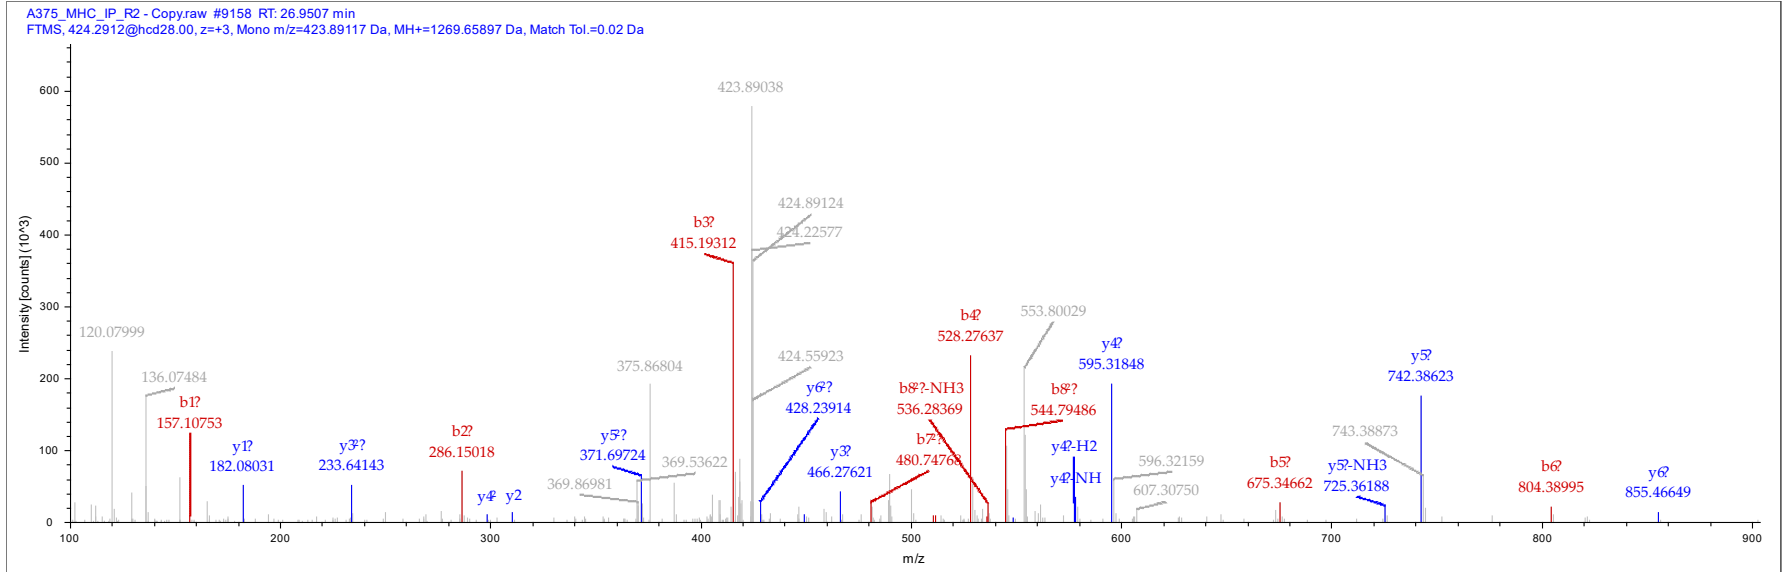

# Spliced peptide - SAADPKVAF

Synthetic

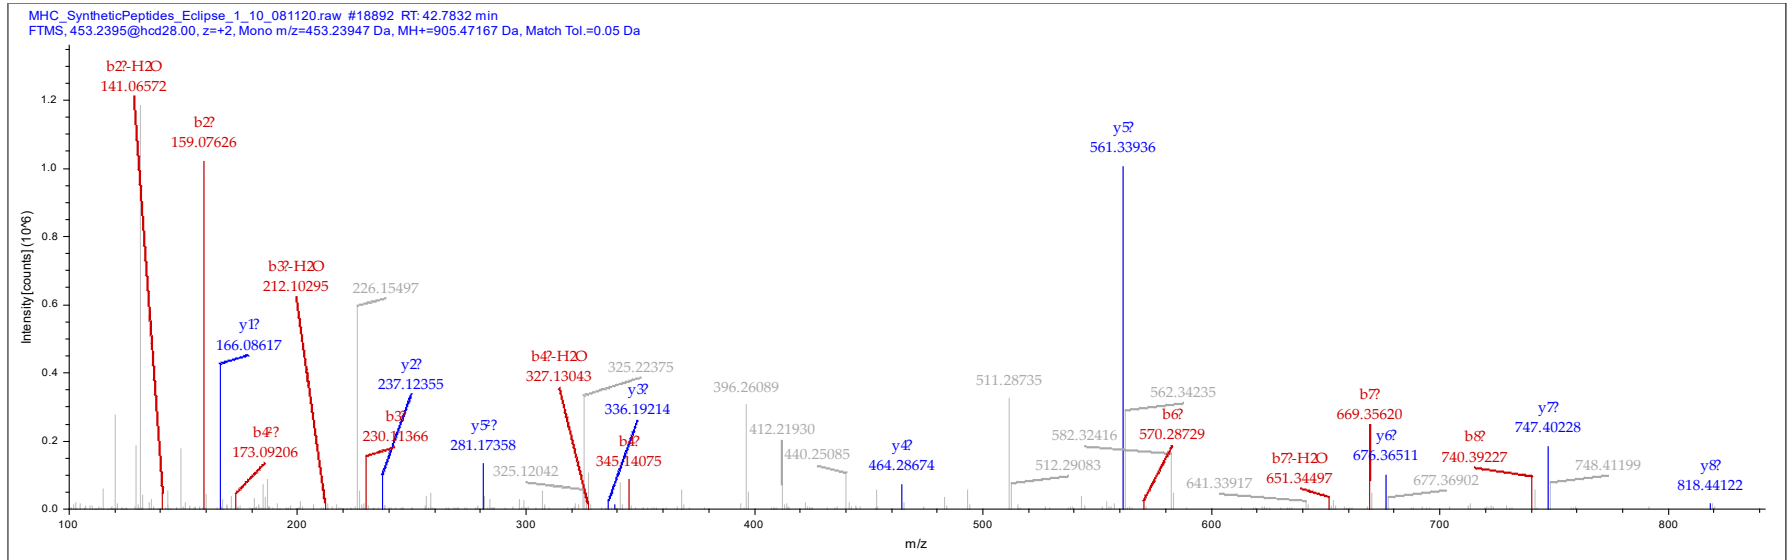

Experimental

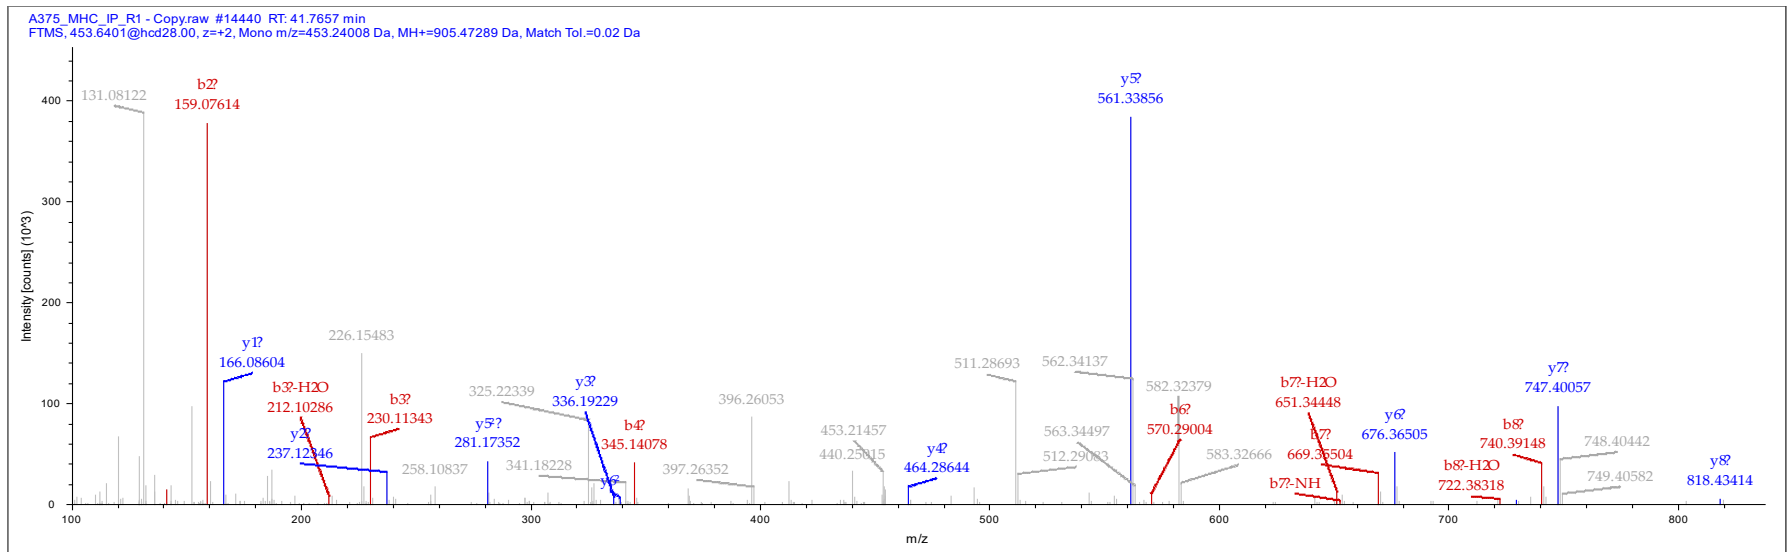

# Spliced peptide - SAAERLLAF

Synthetic

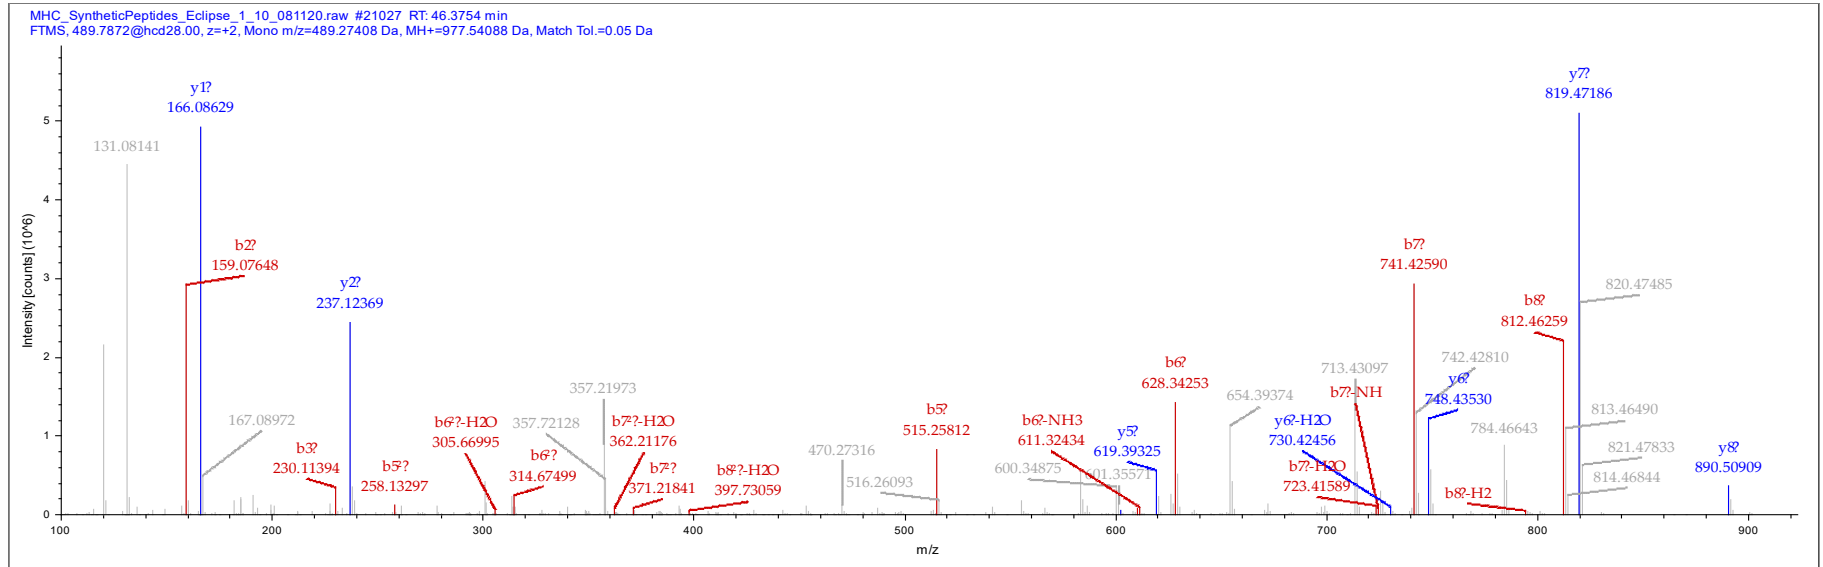

Experimental

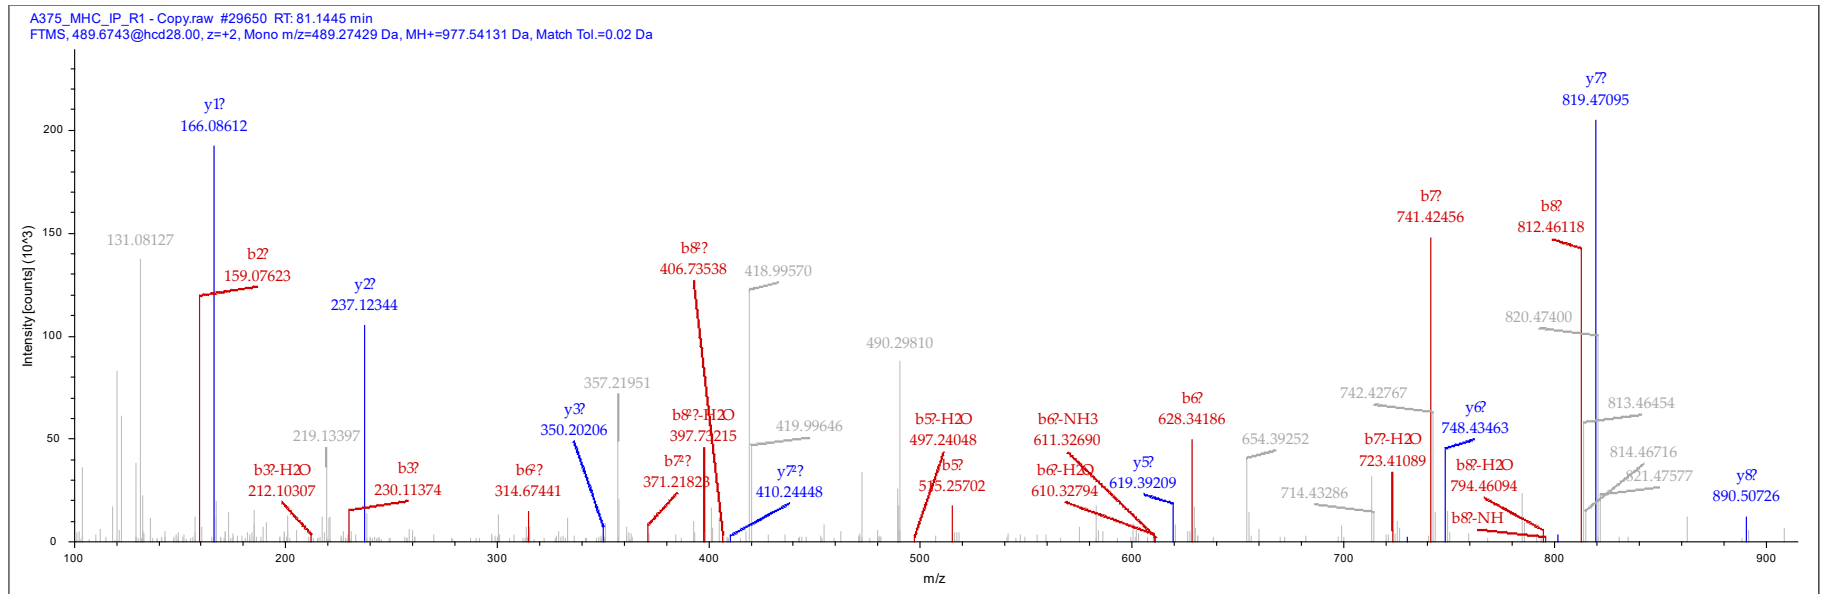

# Spliced peptide - SAAWDRPPL

Synthetic

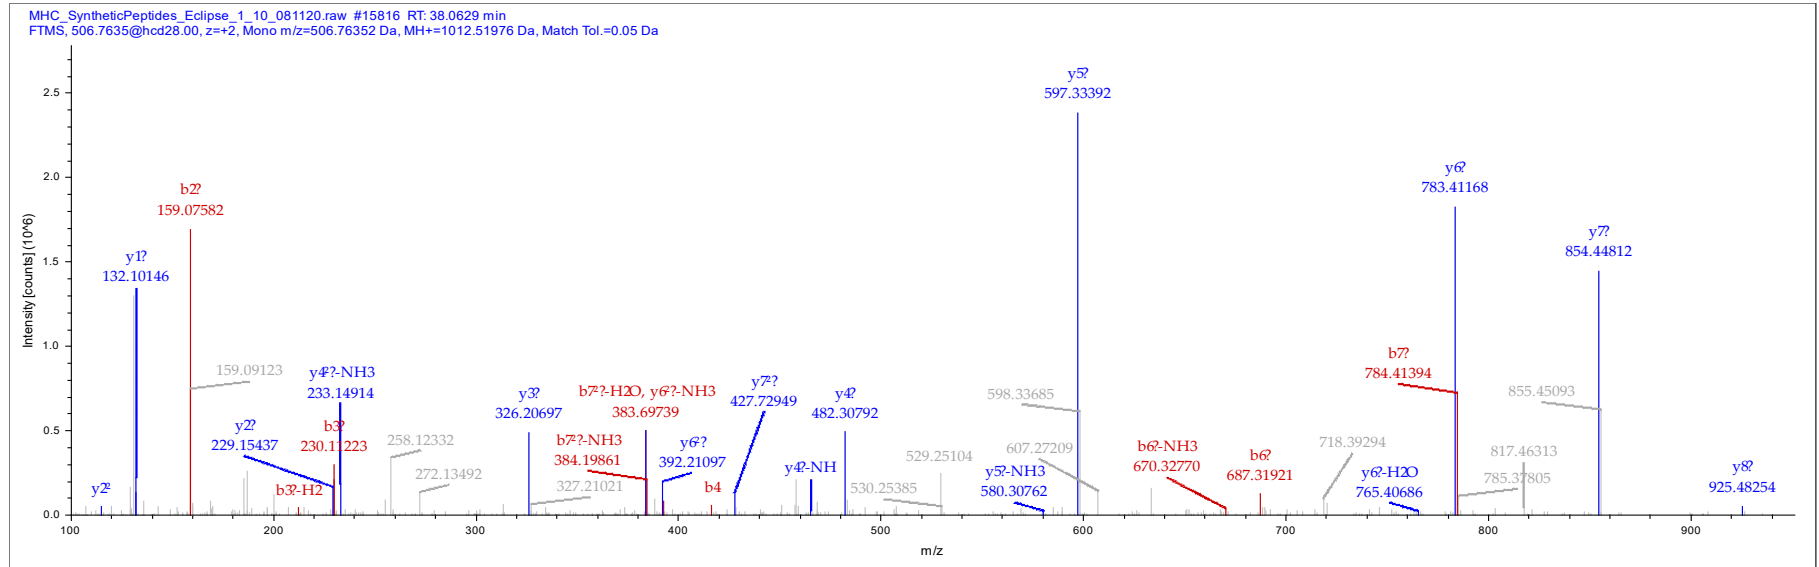

Experimental

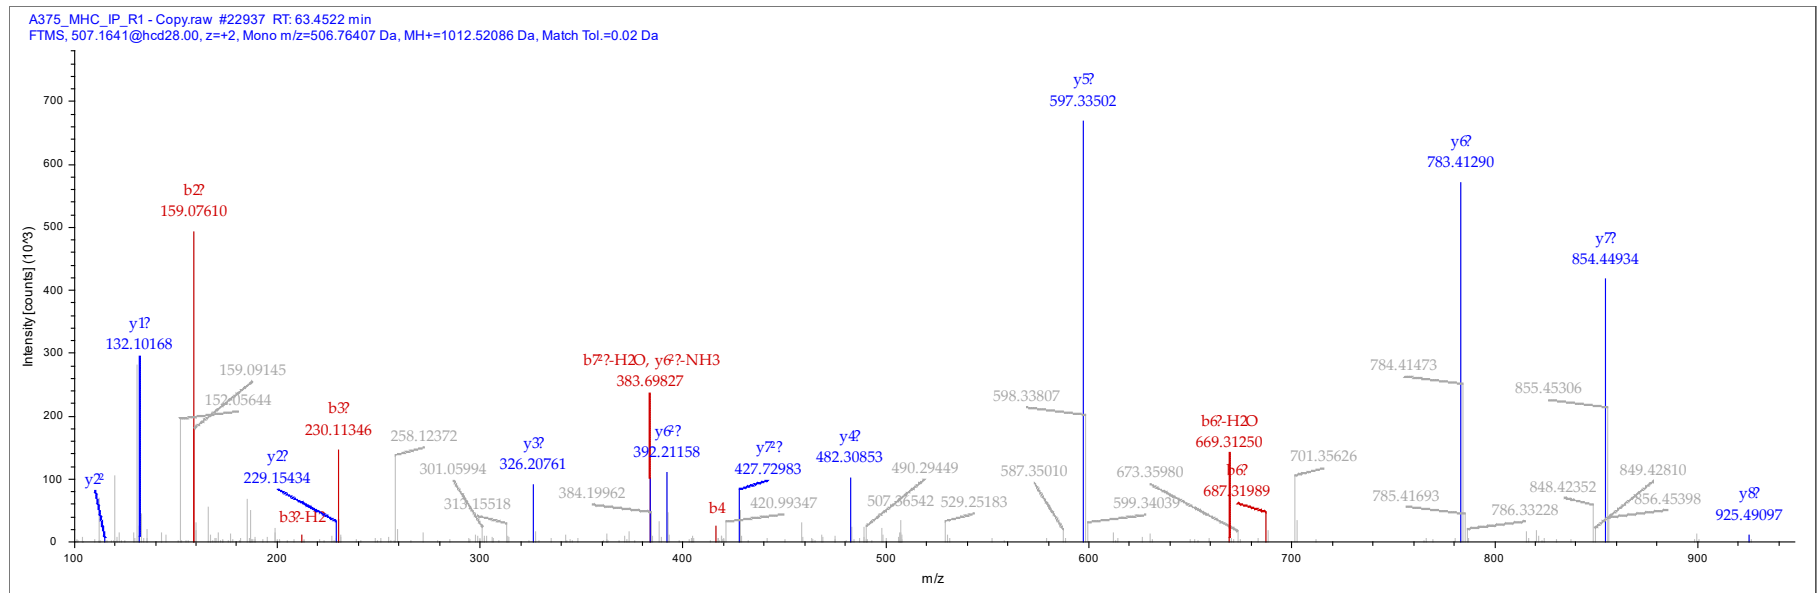



# Spliced peptide - SELCGGANHSF

Synthetic

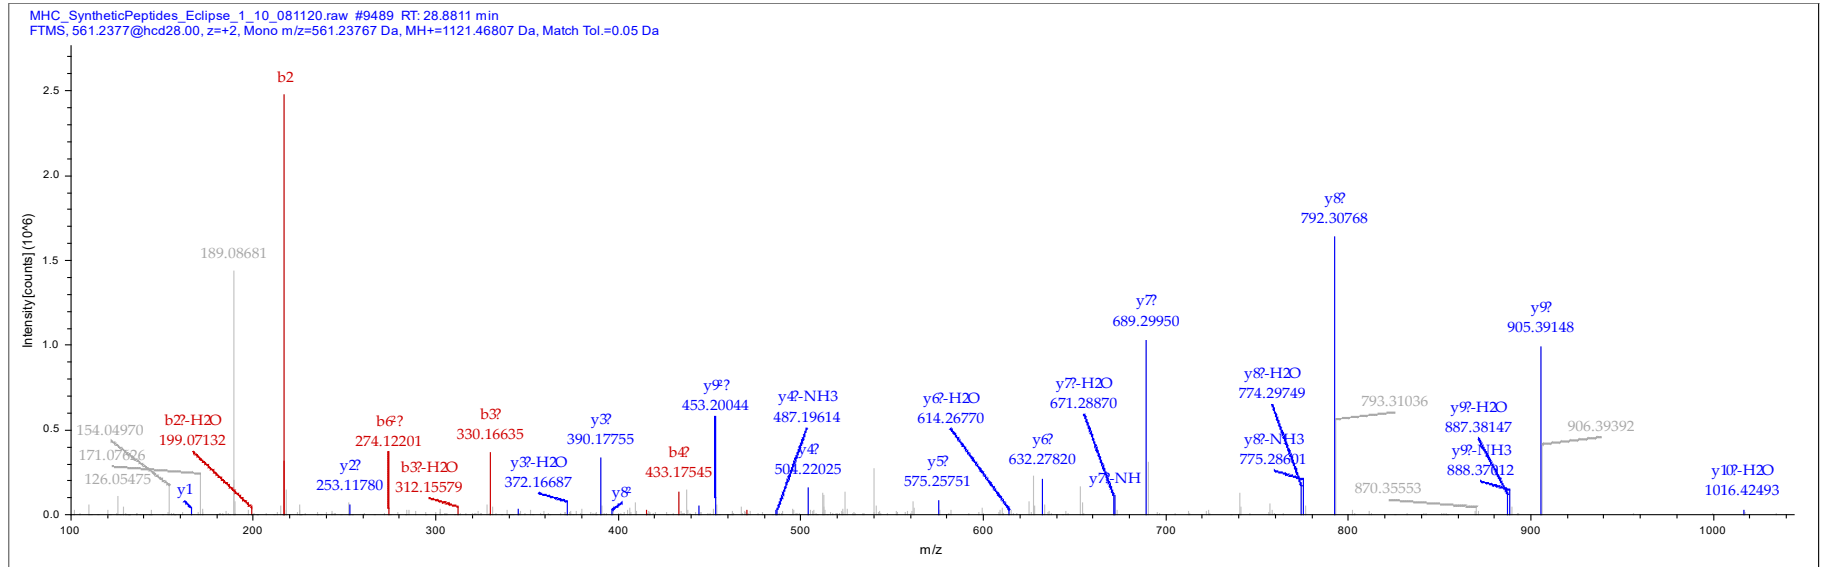

Experimental

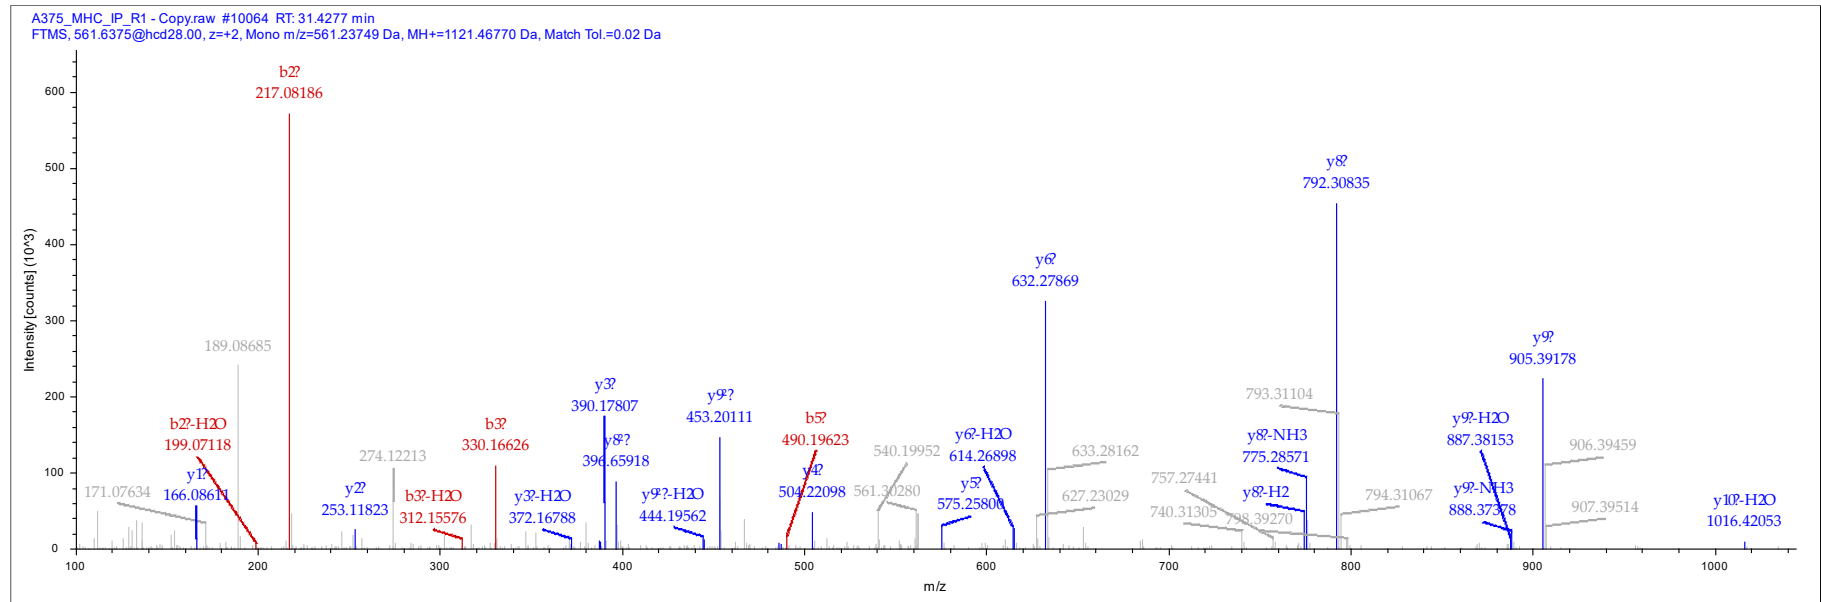

# Spliced peptide - SESLLTKKF

Synthetic

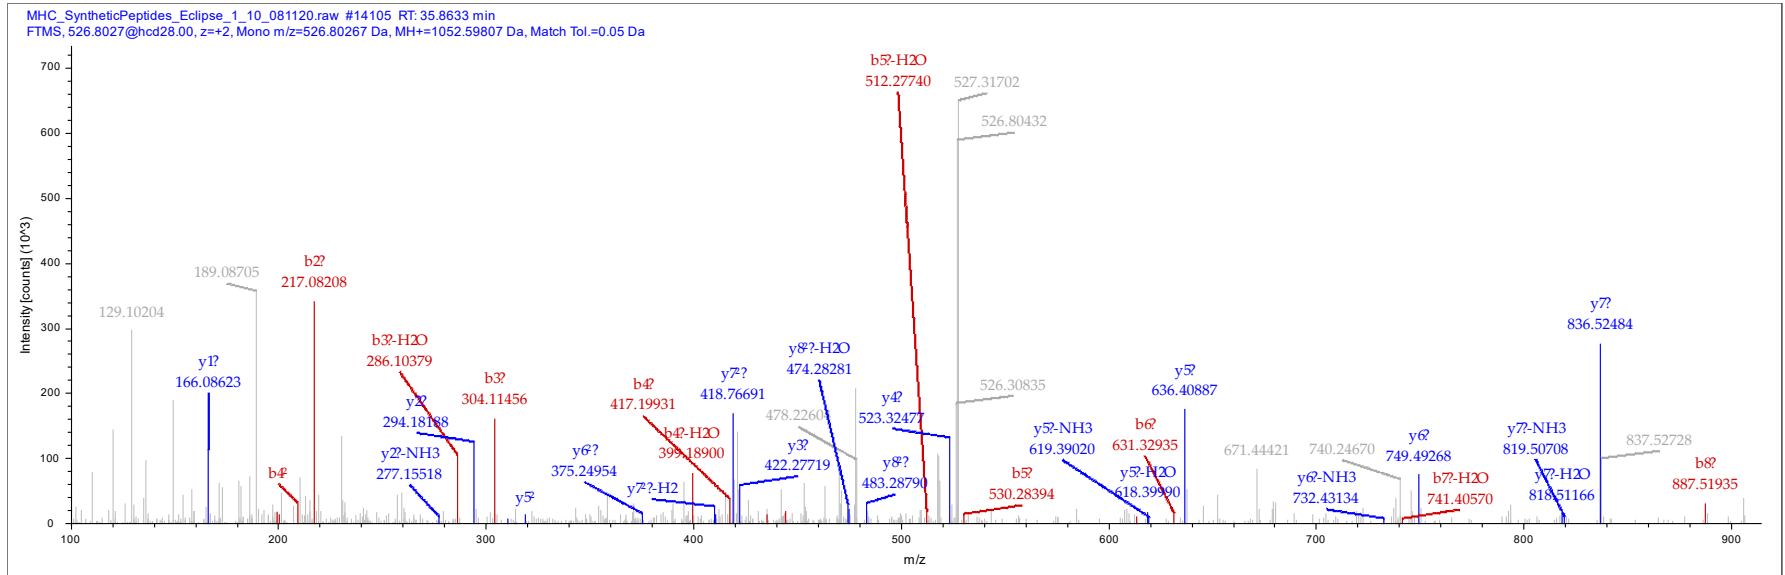

Experimental

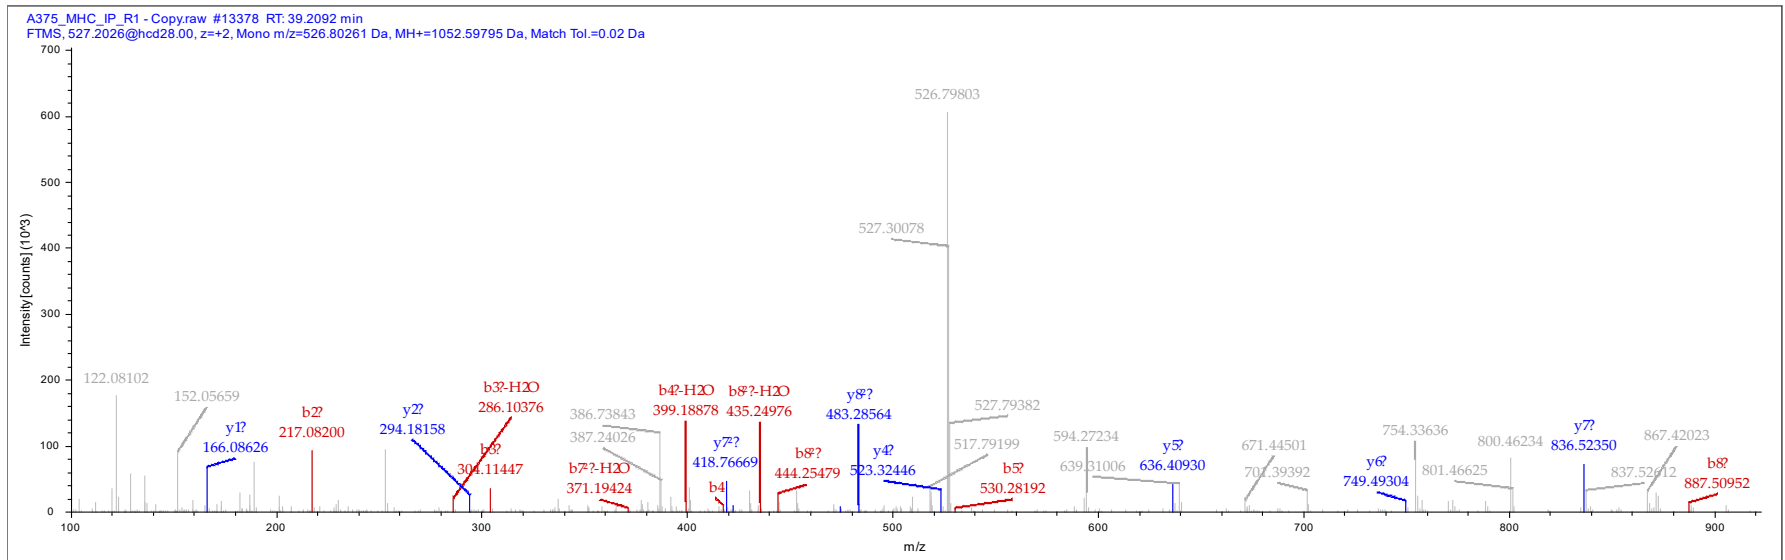

# Spliced peptide - SPVQAAEVKVD

Synthetic

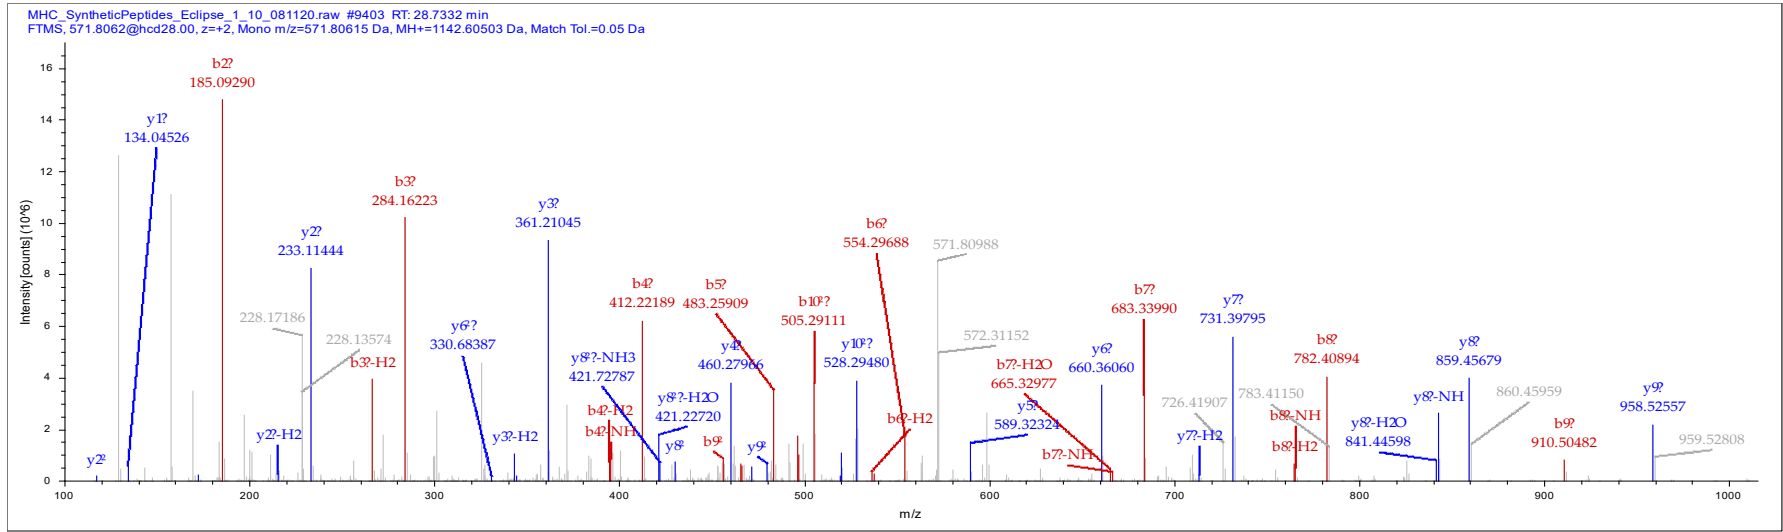

Experimental

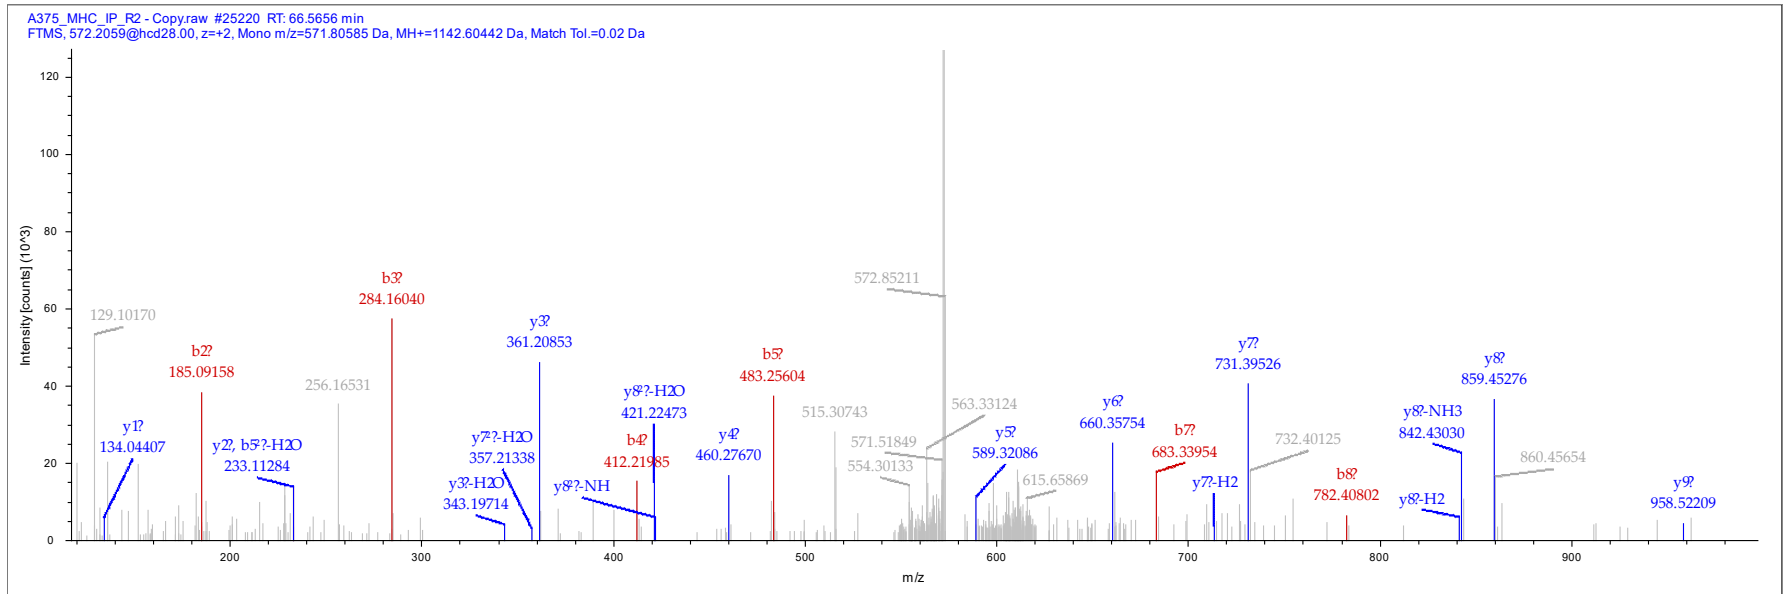

# Spliced peptide - SYAVSVNHV

Synthetic

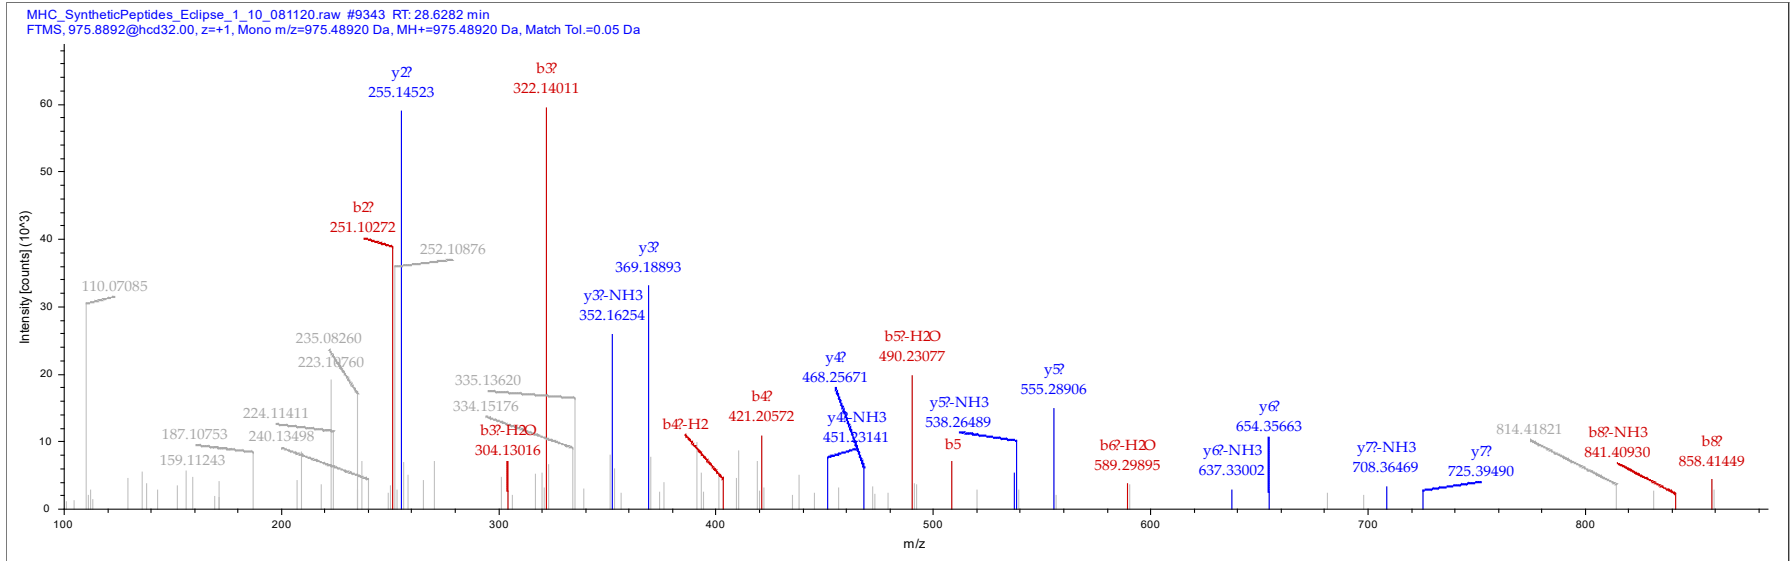

Experimental

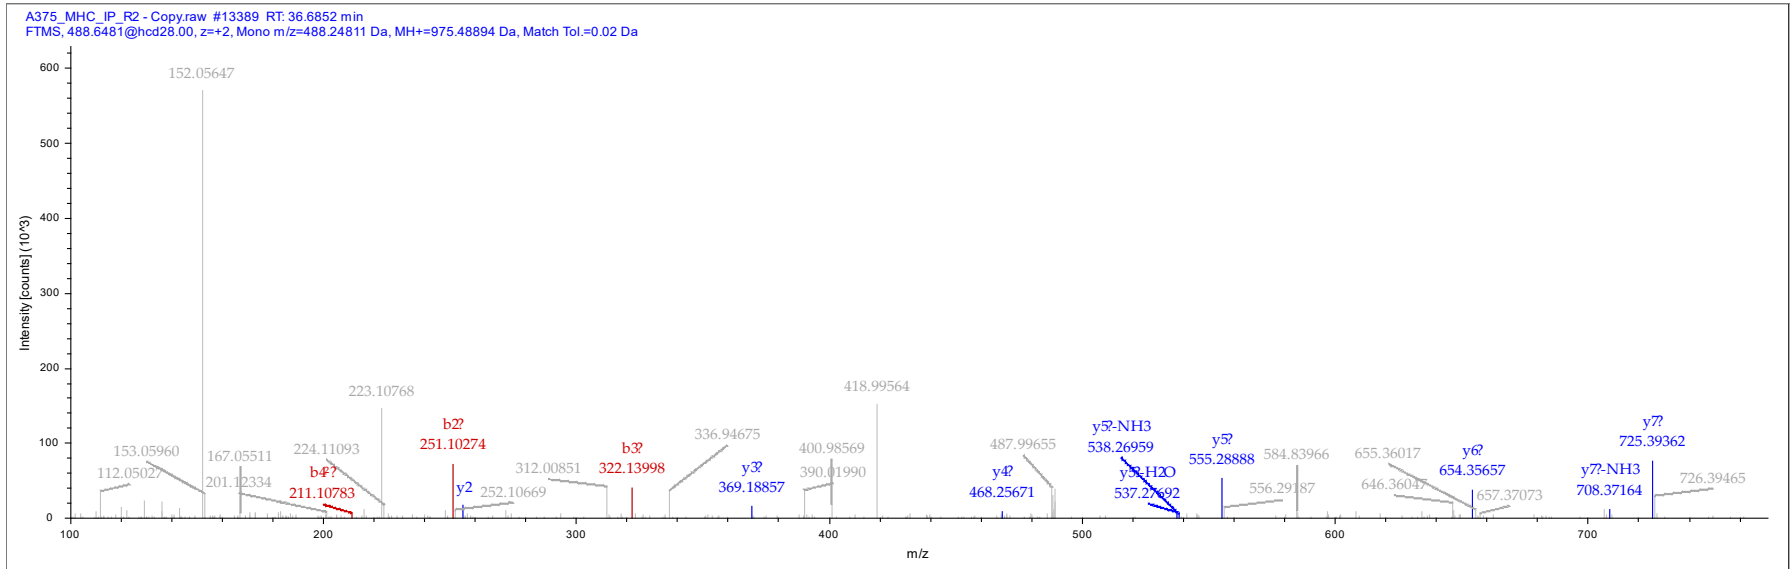

# Spliced peptide - TELDVTKKY

Synthetic

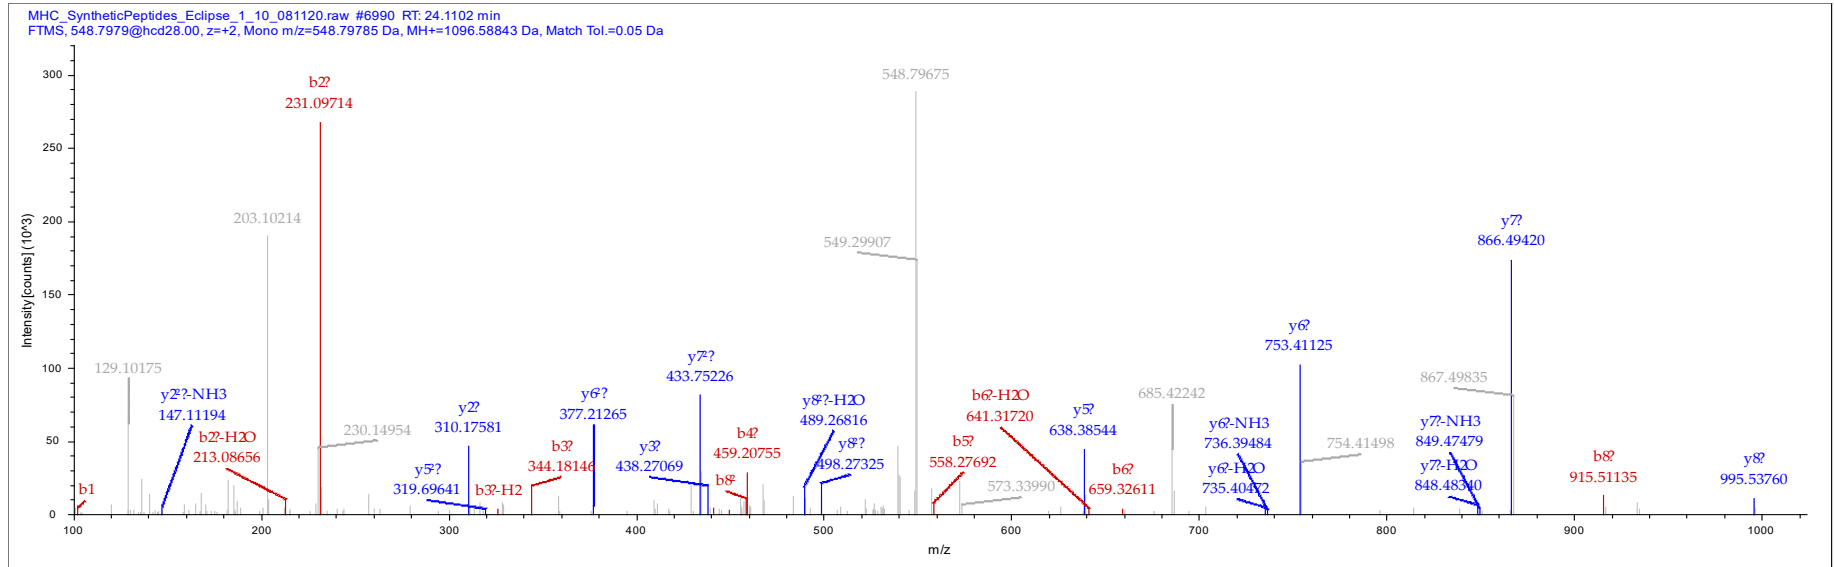

Experimental

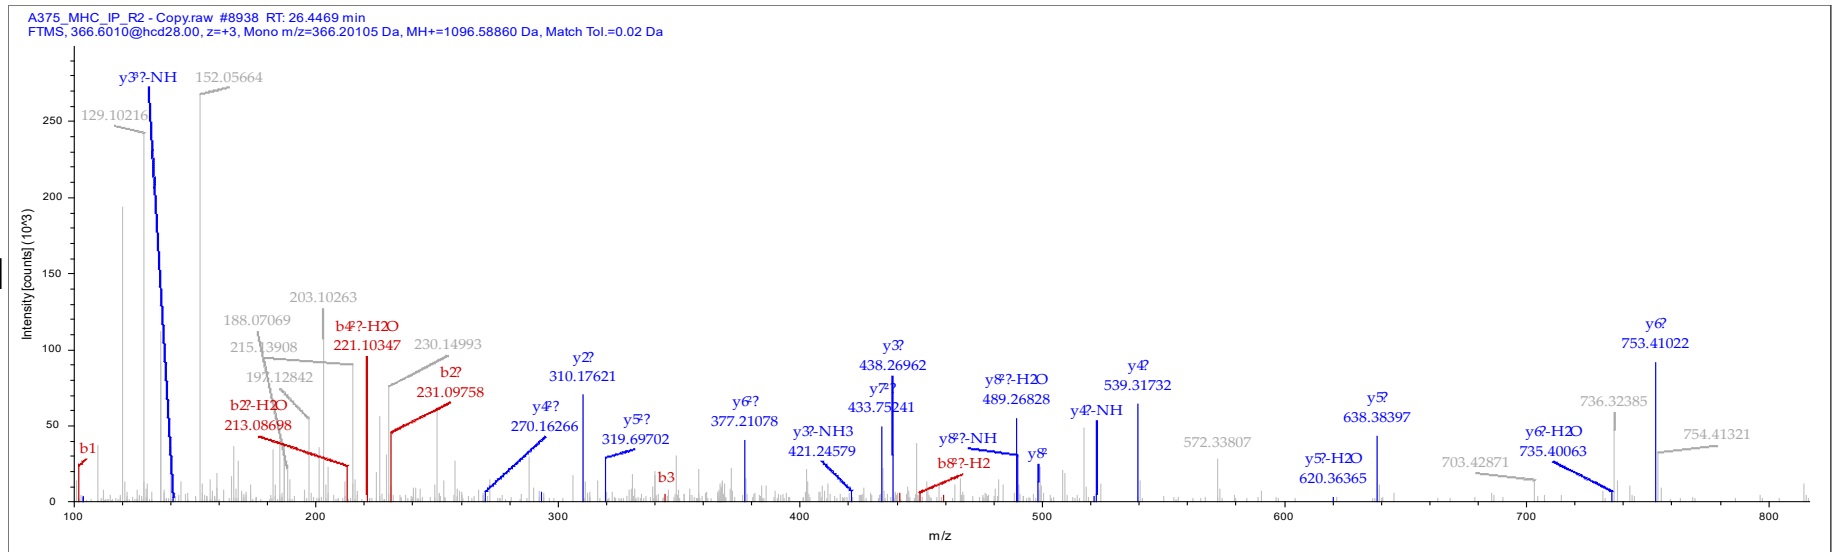

# Spliced peptide - VGAGEGGLRNV

Synthetic

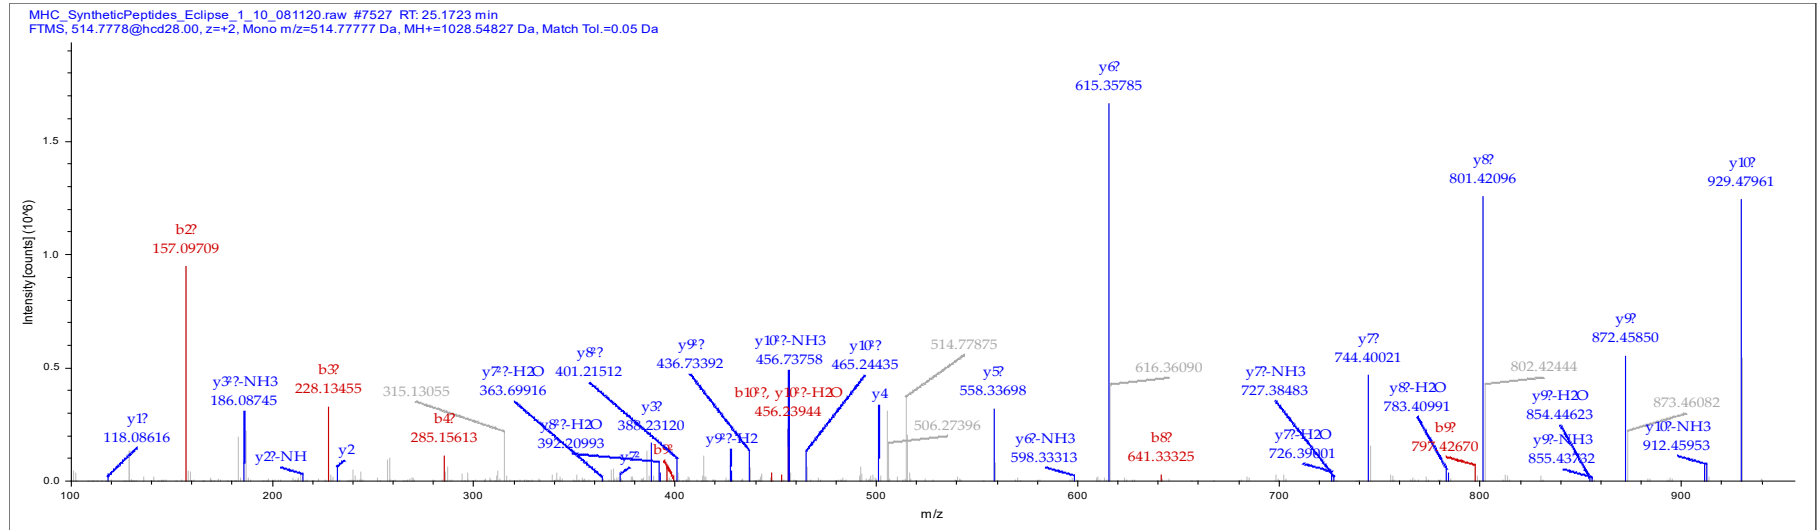

Experimental

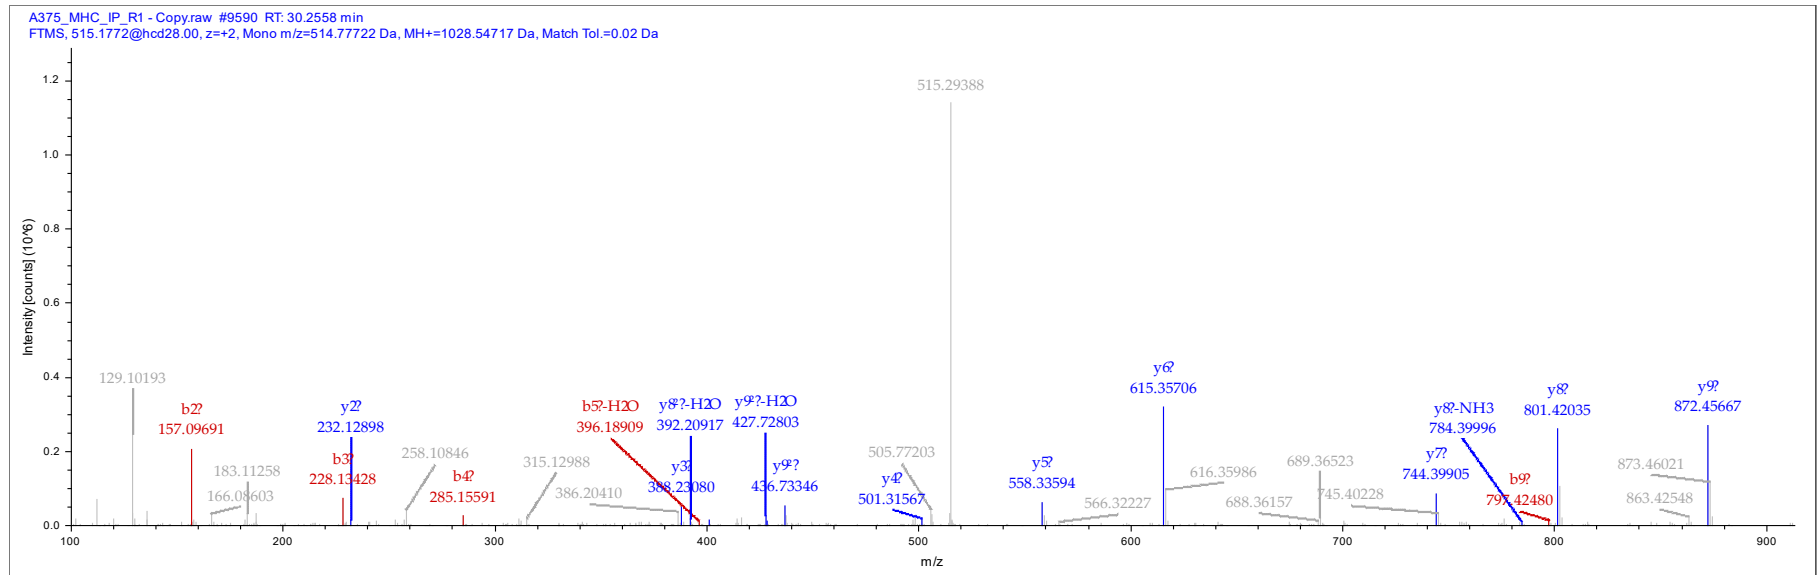

# Spliced peptide - YTDDSPKYN<sup>Y</sup>

Synthetic

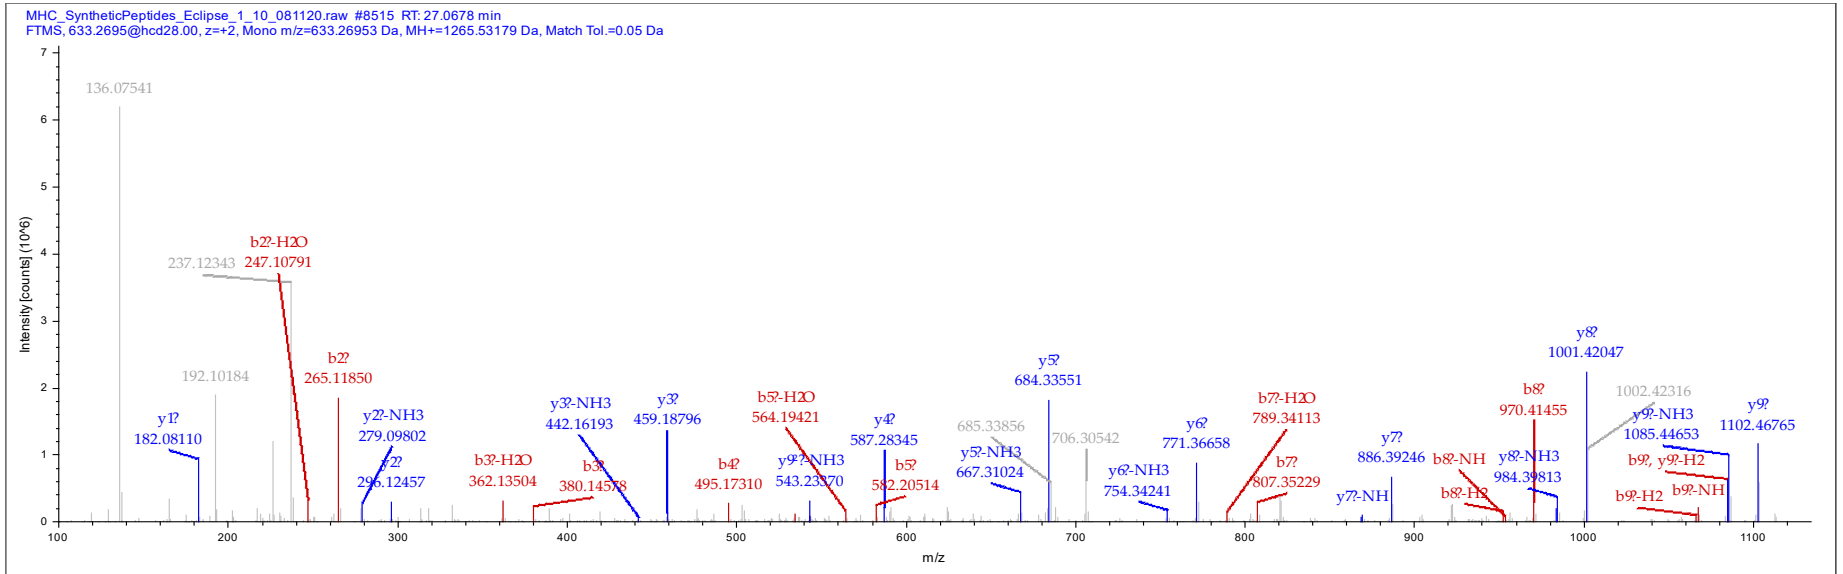

Experimental

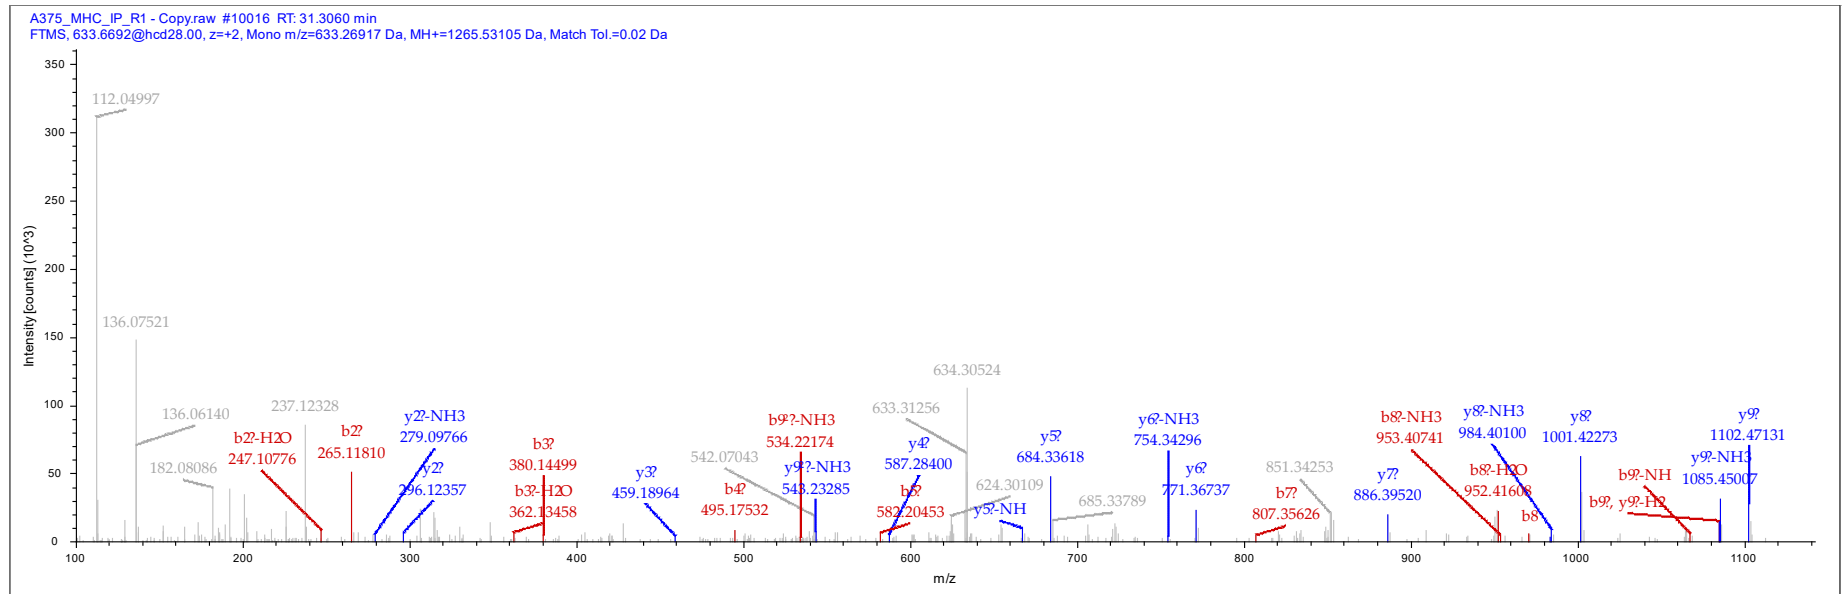

# Spliced peptide - YTDFDGTHRY

Synthetic

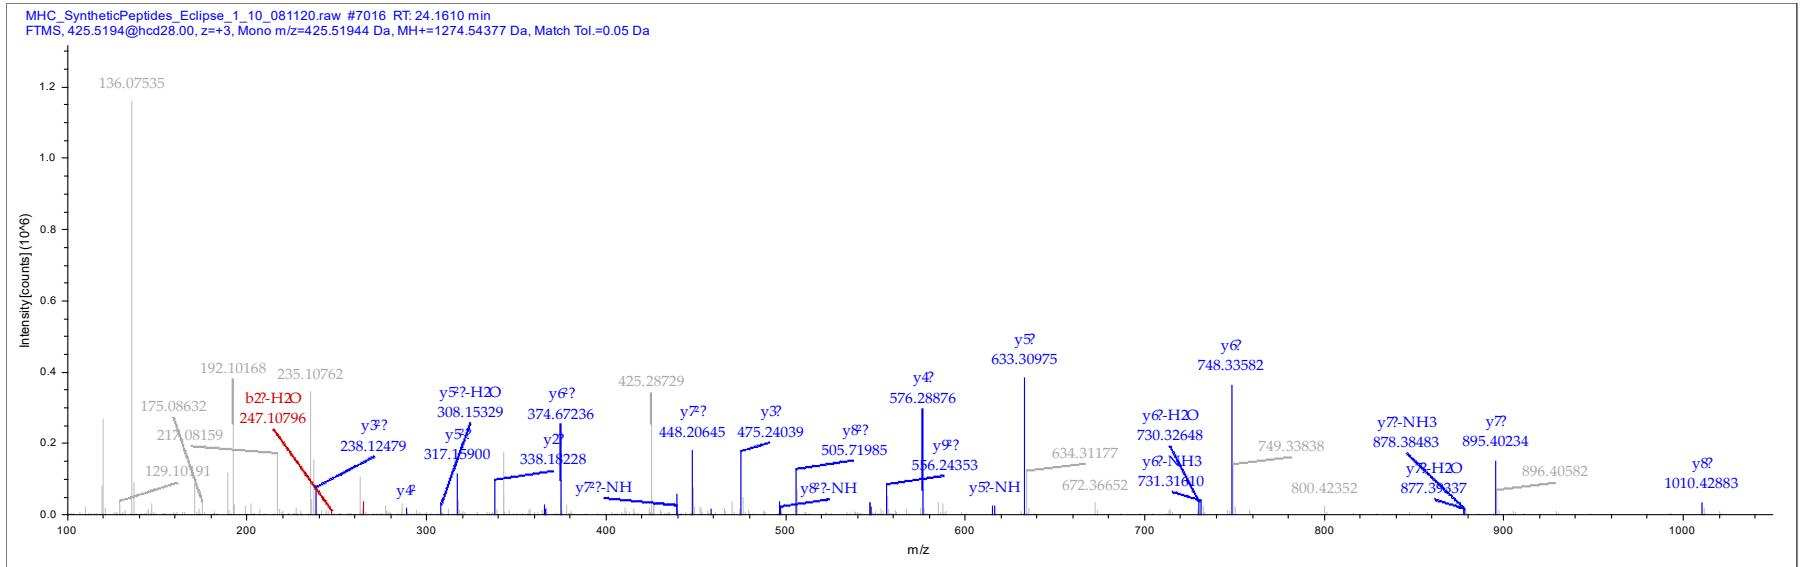

Experimental

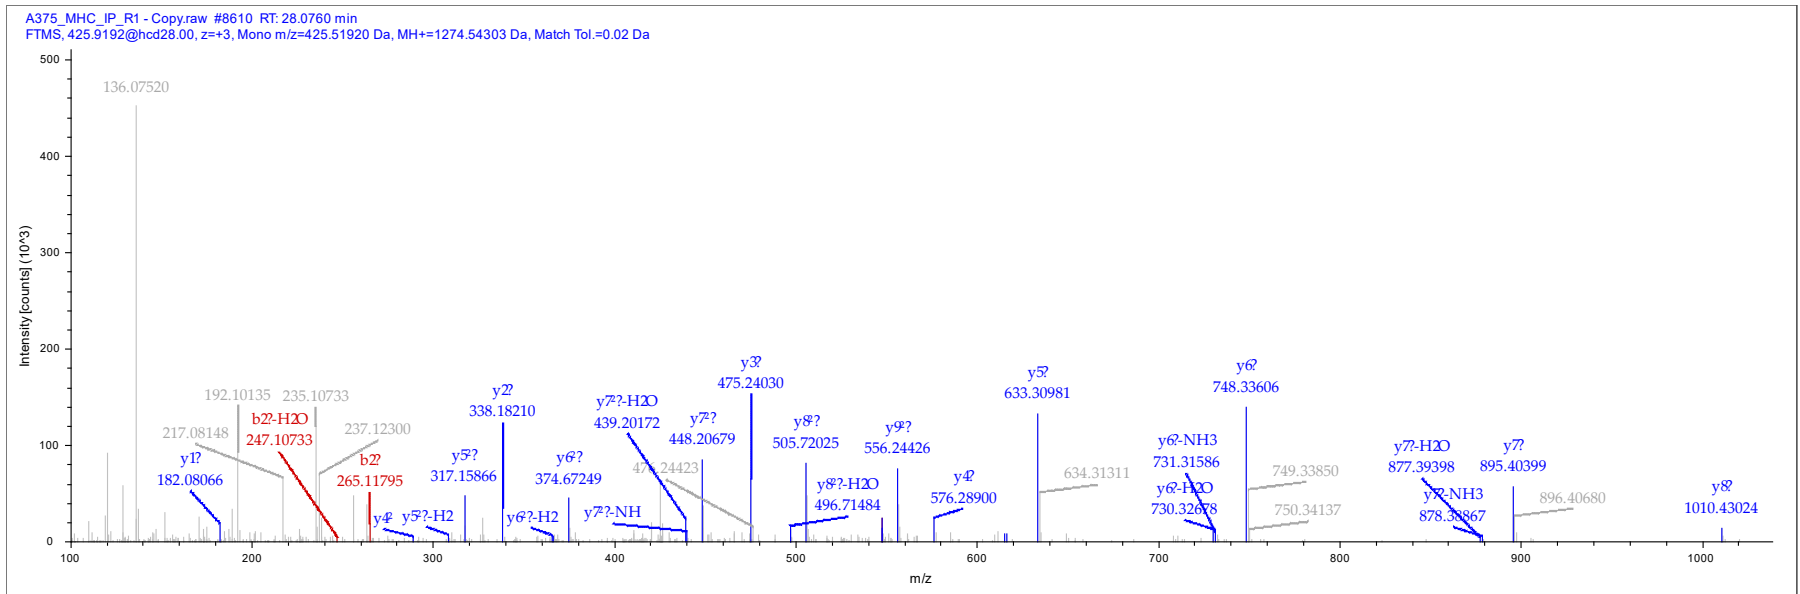



# Spliced peptide - YTDNLVRVAM

Synthetic

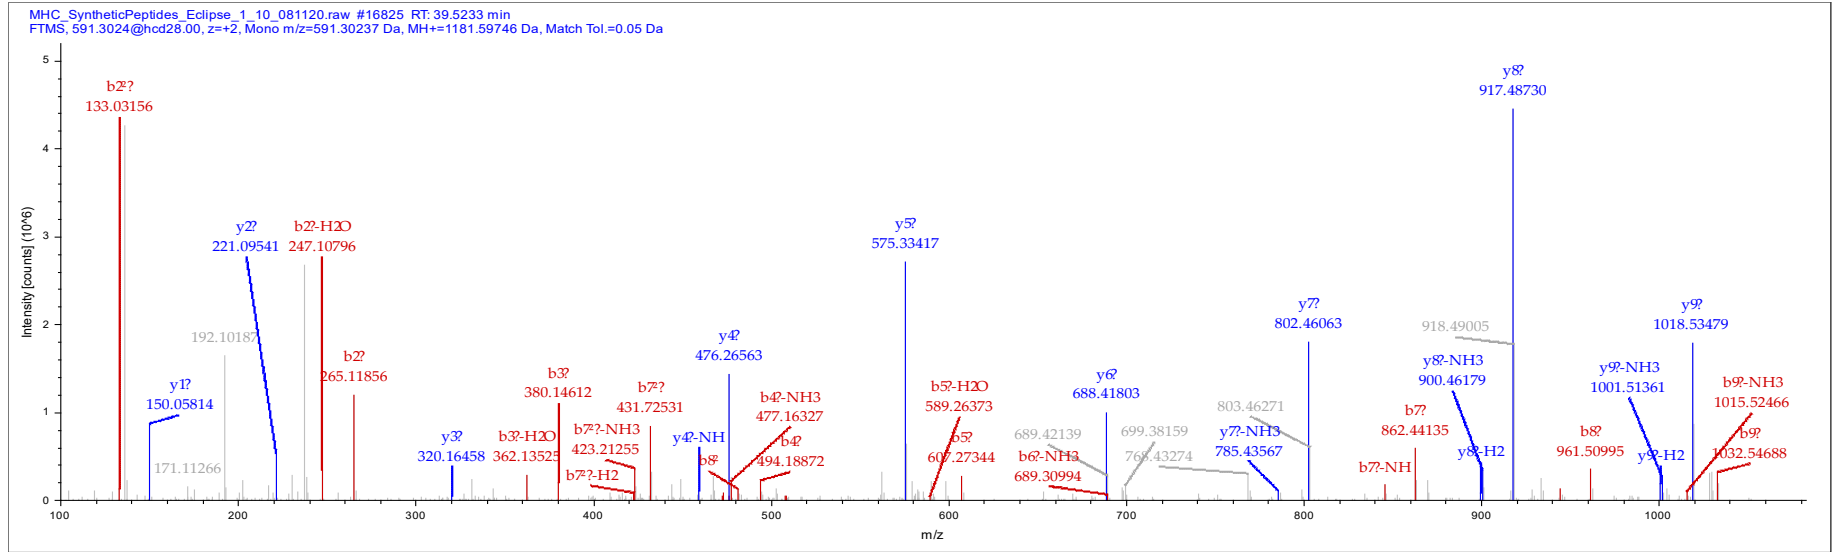

Experimental

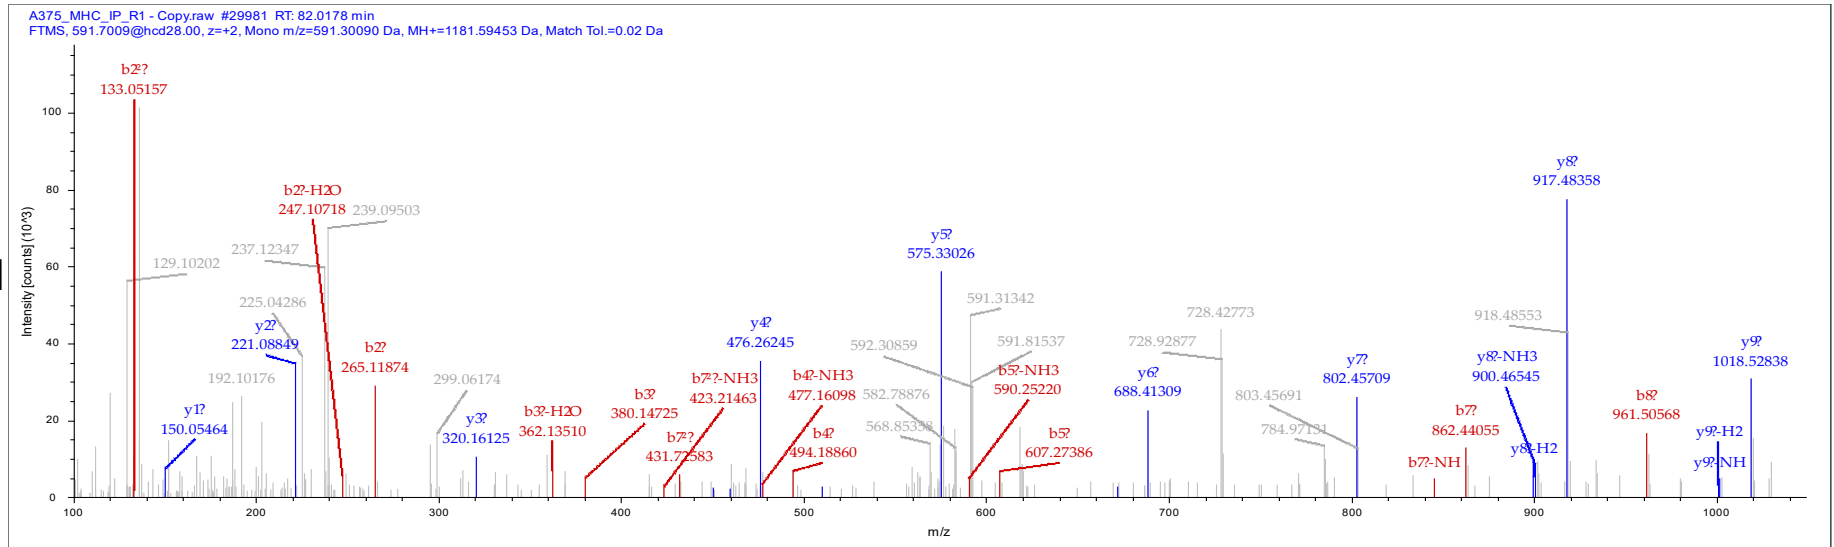

# Spliced peptide - YTEFEDLKSGY

Synthetic

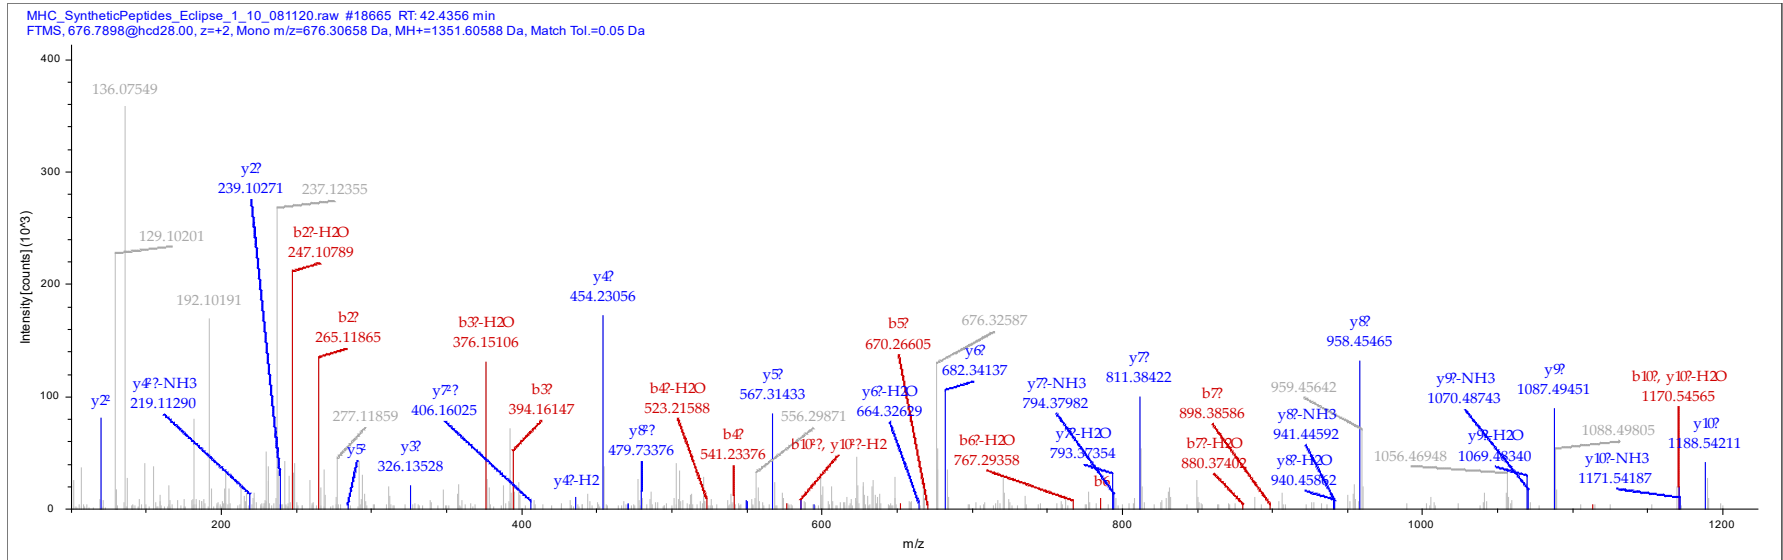

Experimental

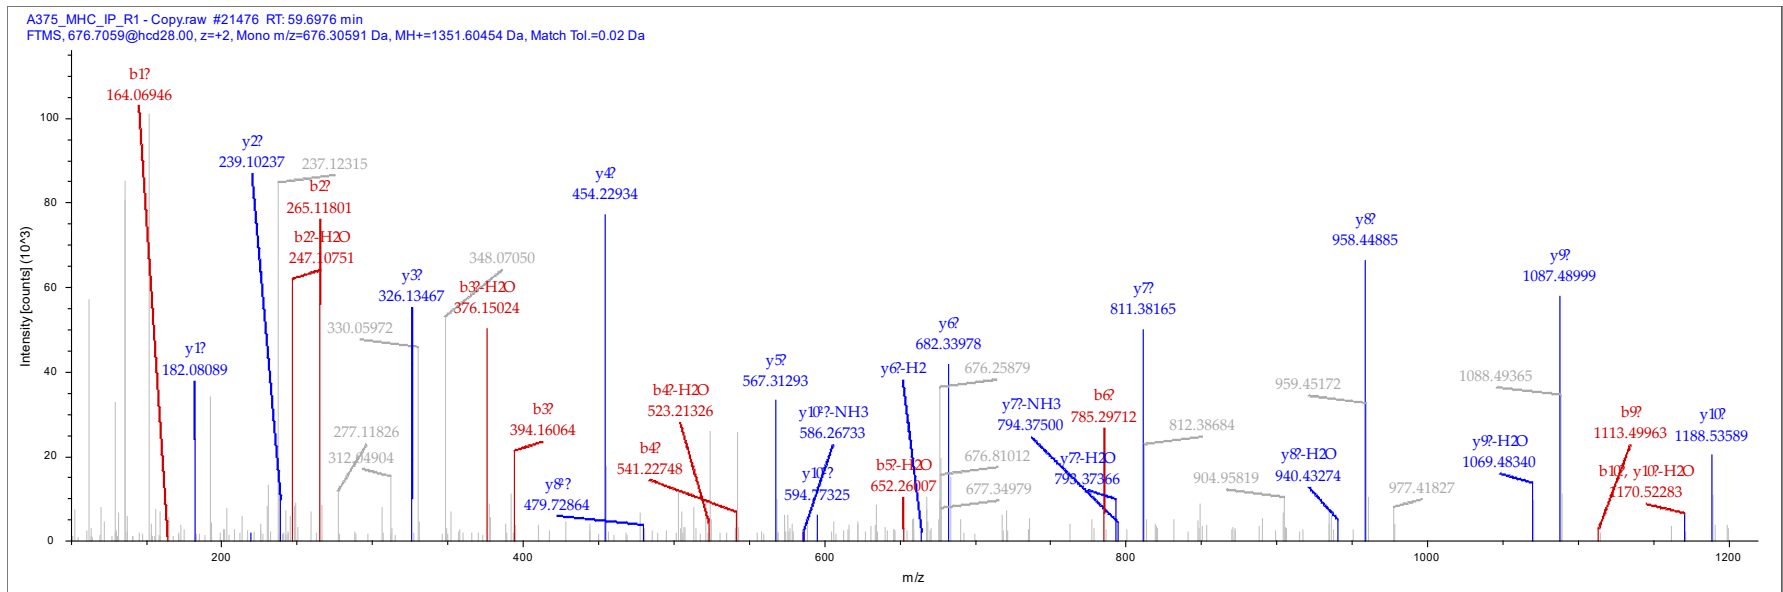

# Spliced peptide - YVDCGGRNTTY

Synthetic

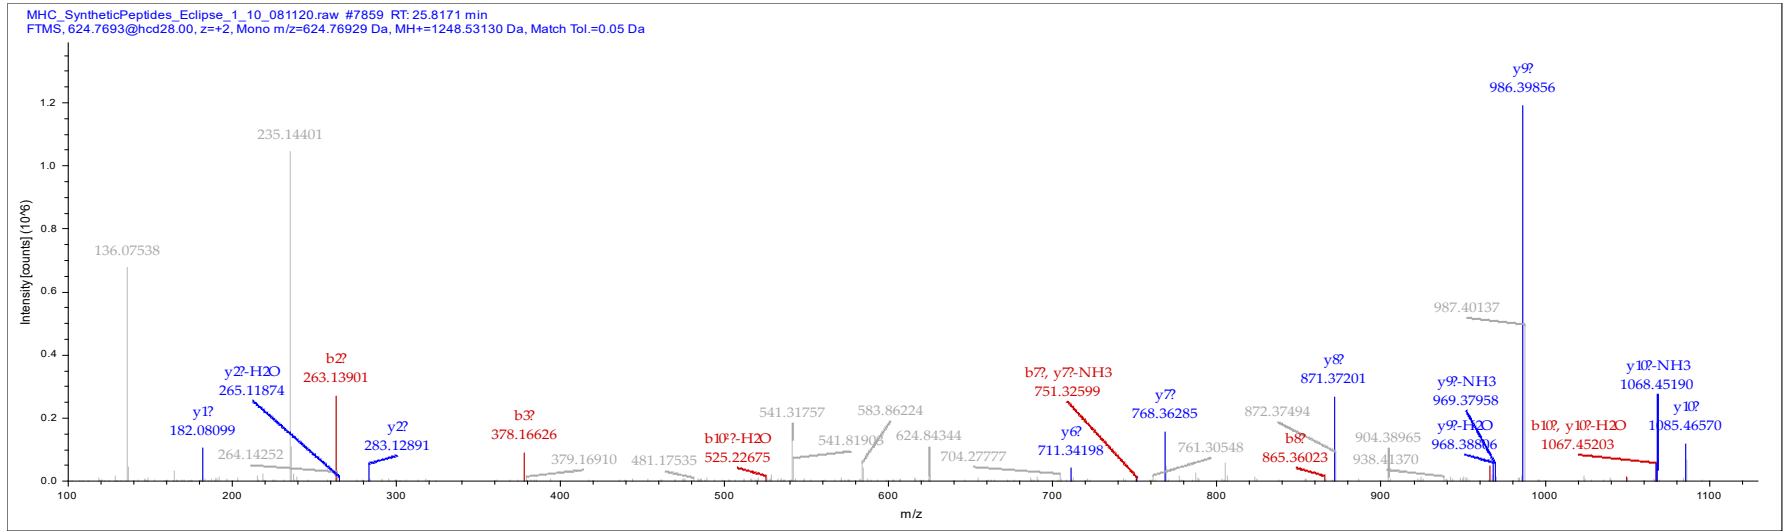

Experimental

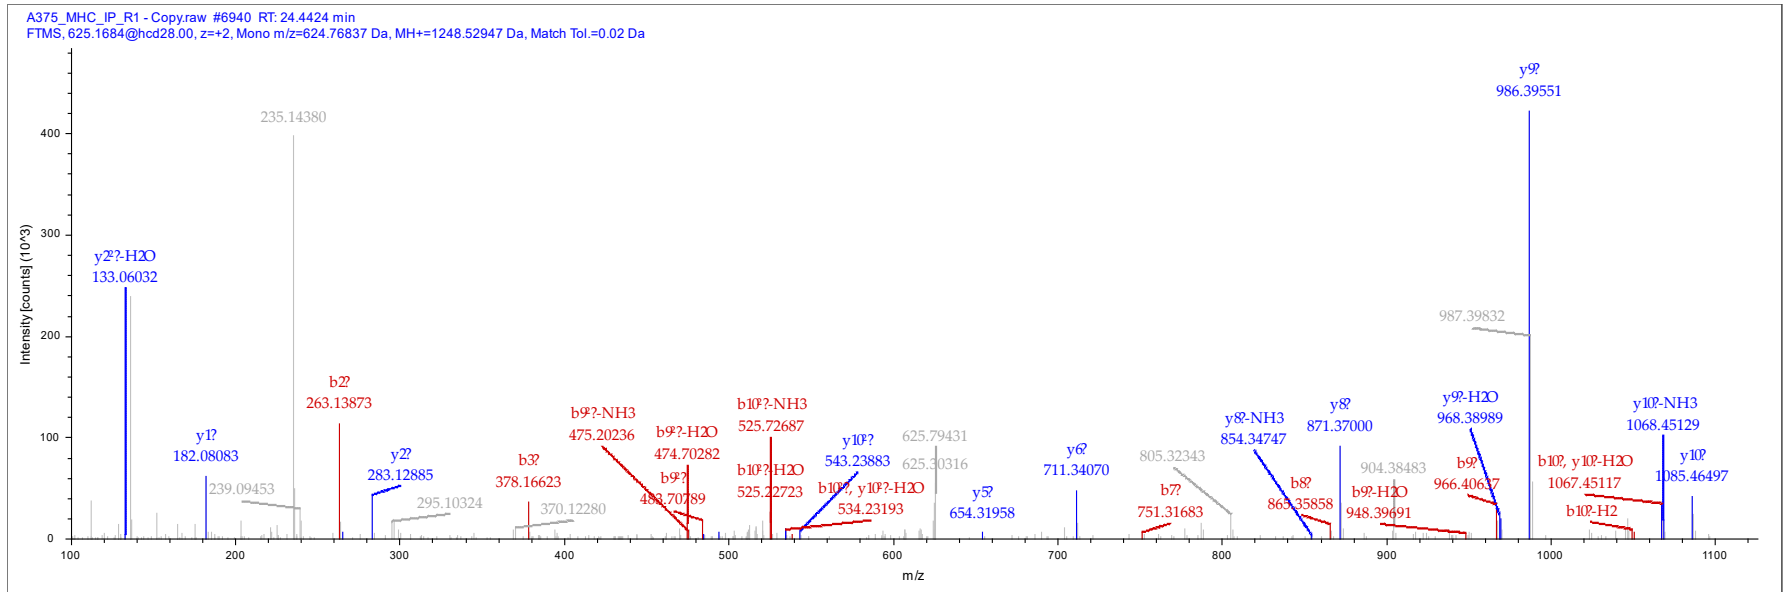

Supplement: 42485_2021_66_MOESM2_ESM.pdf [file 42485_2021_66_MOESM2_ESM.pdf]
