# Supplementary material for: Digging deeper into the immunopeptidome: characterization of post-translationally modified peptides presented by MHC I
Source: PubMed Central journal article supplement (PMC9807509; doi:10.1007/s42485-021-00066-x), 2021-06-04

# Supplementary Figure 1

1A.

A375 cell line

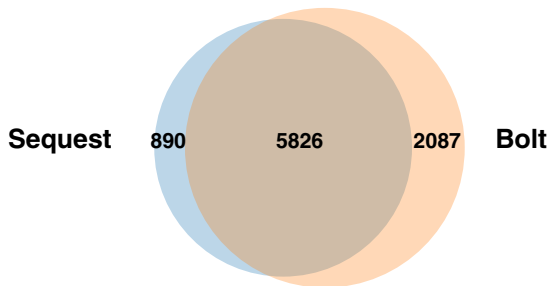

1B.

Loucy cell line

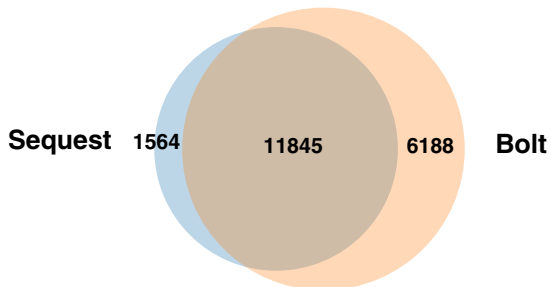

Supplement: 42485_2021_66_MOESM1_ESM.pdf [file 42485_2021_66_MOESM1_ESM.pdf]
